# Supplementary material for: Synthesis and migrastatic activity of cytochalasin analogues lacking a macrocyclic moiety
Source: Royal Society of Chemistry journal article supplement (doi:10.1039/d3md00535f), 2023-11-28

Supporting Information

**Synthesis and migrastatic activity of cytochalasin analogues lacking a macrocyclic moiety**

Bedřich Formánek,<sup>a</sup> Dorian Dupommier,<sup>a</sup> Tereza Volfová,<sup>b</sup> Silvie Rimpelová,<sup>c</sup> Aneta Škarková,<sup>b</sup> Jana Herciková,<sup>a</sup> Daniel Rösel,<sup>b</sup> Jan Brábek,<sup>b</sup> and Pavla Perlíková <sup>\*a,d</sup>

- a) Department of Organic Chemistry, Faculty of Chemical Technology, University of Chemistry and Technology, Prague, Technická 5, 166 28 Prague, Czech Republic.  
E-mail: perlikop@vscht.cz*
- b) Department of Cell Biology, BIOCEV, Faculty of Science, Charles University, Vestec, Prague West 252 50, Czech Republic.*
- c) Department of Biochemistry and Microbiology, Faculty of Food and Biochemical Technology, University of Chemistry and Technology Prague, Technická 5, 166 28 Prague, The Czech Republic.*
- d) Institute of Organic Chemistry and Biochemistry, Czech Academy of Sciences, Flemingovo namesti 2, 160 00 Prague, Czech Republic.*

**Contents:**

|                                                   |     |
|---------------------------------------------------|-----|
| Synthesis of compound <b>5</b> .....              | S2  |
| Supplementary schemes S2-S4.....                  | S5  |
| Supplementary table S1 .....                      | S7  |
| Supplementary figures S1-S2 .....                 | S7  |
| HPLC purity of final cytochalasin analogues ..... | S9  |
| Copies of NMR spectra .....                       | S22 |

## Synthesis of compound 5

### General remarks

Visualization methods for TLC: Compounds were visualized by irradiation with UV light (254 nm) and/or by treatment with a solution of phosphomolybdic acid (5 g), Ce(SO<sub>4</sub>)<sub>2</sub>·H<sub>2</sub>O (2 g), conc. H<sub>2</sub>SO<sub>4</sub> (12 mL) and H<sub>2</sub>O (188 mL) followed by heating or treatment with a solution of anisaldehyde (9 mL) in EtOH (230 mL), conc. H<sub>2</sub>SO<sub>4</sub> (8 mL) and conc. AcOH (3 mL) followed by heating or treatment with a solution of ninhydrin (0.2 g) in EtOH (100 mL), conc. AcOH (0.5 mL) and H<sub>2</sub>O (4.5 mL) followed by heating.

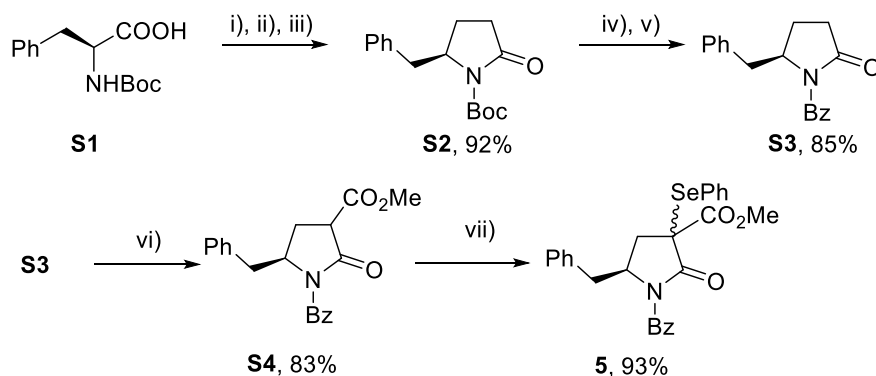

**Scheme S1:** Preparation of selenide **5**. Reaction conditions: i) Meldrum's acid, EDC, DMAP, DCM, 0°C to RT, 3 h; ii) NaBH<sub>4</sub>, AcOH, DCM, 0°C to RT; iii) toluene, reflux, 3 h; iv) TFA, DCM, 10°C-RT, 1 h; v) BzCl, py, RT, 4 h; vi) ClCO<sub>2</sub>Me, LiHMDS, THF, -78°C, 4.5 h; vii) PhSeCl, LiHMDS, THF, -78°C, 5 h.

The *tert*-butyl (*R*)-2-benzyl-5-oxopyrrolidine-1-carboxylate (**S2**) was synthesized according to the known procedures<sup>1</sup> in three steps starting from (*tert*-butoxycarbonyl)-L-phenylalanine (**S1**, 7.96 g, 30.0 mmol). All three reactions were monitored by TLC (hexanes/EtOAc/AcOH : 7/3/0.5).<sup>1c</sup>

First step was amide coupling of **S1** and Meldrum's acid (4.54 g, 31.5 mmol, recrystallized) proceeded with EDC (8.63 g, 45.0 mmol) and DMAP (5.50 g, 45.0 mmol) in dry DCM (90 mL) at 0°C, then RT for 3 h<sup>1b,c</sup>, followed by evaporation of a crude extract to ca. 100 mL and reduction by NaBH<sub>4</sub> (3.40 g, 90.0 mmol) and AcOH (17.2 mL, 300 mmol) at 0°C for 1 h, then RT overnight (after 3 h, the reaction is almost complete).<sup>1a,c</sup> Crude product was refluxed in toluene (150 mL) for 3 h. After evaporation of the solvent, column chromatography of the residue (80 g SiO<sub>2</sub>, 0-20% EtOAc in hexanes) furnished the **S2** (7.62 g, 92%), yellow oil. Our physical and spectroscopic data corroborated previously published materials.<sup>1a</sup>

The (*R*)-1-benzoyl-5-benzylpyrrolidin-2-one (**S3**) was synthesized according to the known procedures<sup>1d</sup>, TFA (7.6 mL) was added to **S2** (7.62 g, 27.6 mmol) in DCM (30.5 mL) at 10°C dropwise. The reaction mixture was stirred at RT until full conversion (1 h, TLC, hexanes/EtOAc : 4/1). BzCl (6.35 mL, 55.2 mmol) was added dropwise to the crude

<sup>1</sup> a) M. Smrčina, P. Majer, E. Majerová, T. A. Guerassina and M. A. Eissenstat, *Tetrahedron*, 1997, **53**, 12867-12874; b) S. Shankar, N. A. Wani, U. P. Singh and R. Rai, *Chemistry Select*, 2016, **1**, 3675-3678; c) O. Chaloin, F. Cabart, J. Marin, H. Zhang and G. Guichard, *Organic Syntheses*, 2008, **85**, 147-157; d) B. Hao, M. J. Gunaratna, M. Zhang, S. Weerasekara, S. N. Seiwald, V. T. Nguyen, A. Meier and D. H. Hua, *Journal of the American Chemical Society*, 2016, **138**, 16839-16848.

product in pyridine (69 mL) at RT.<sup>2</sup> After full conversion (4 h, TLC, DCM/MeOH : 20/1), Et<sub>2</sub>O (173 mL, 2.5 vol of py) was added, precipitate was filtered, filtrate concentrated and co-distilled with toluene (2×) under reduced pressure. Column chromatography of the residue (80 g SiO<sub>2</sub>, 10-25% EtOAc in hexanes) furnished the **S3** (6.55 g, 85%), yellow oil. Our physical and spectroscopic data corroborated previously published materials.<sup>3</sup>

#### Methyl (5*R*)-1-benzoyl-5-benzyl-2-oxopyrrolidine-3-carboxylate (**S4**)

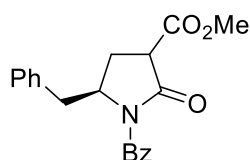

This compound was synthesized in analogy with a known procedure<sup>4</sup> from **S3** (0.57 g, 2.0 mmol) in dry THF (3 mL), using LiHMDS (4.0 mL, 4.0 mmol, 1M in THF) and neat methyl chloroformate (0.31 mL, 4.0 mmol). After full conversion (4 h, TLC, hexanes/EtOAc : 5/1) column chromatography of the residue on silica gel (0-20% EtOAc in hexanes) furnished **S4** (0.57 g, 83%) as a 1.7/1 diastereomeric mixture, yellow oil.

#### <sup>1</sup>H NMR (400 MHz, CDCl<sub>3</sub>)

major: δ 7.63–7.58 (m, 2H, 2×Ar), 7.58–7.50 (m, 1H *overlapped*, Ar), 7.47–7.39 (m, 2H *overlapped*, 2×Ar), 7.38–7.21 (m, 5H *overlapped*, Ar), 4.87 (dddd,  $J_{5,4a} = 8.6$  Hz,  $J_{5,Ph-CHb} = 7.9$  Hz,  $J_{5,Ph-CHa} = 3.5$  Hz,  $J_{5,4b} = 2.7$  Hz, 1H, H-5), 3.71 (s, 3H, COOCH<sub>3</sub>), 3.35 (dd,  $J_{3,4a} = 10.0$  Hz,  $J_{3,4b} = 9.1$  Hz, 1H, H-3), 3.24 (dd,  $J_{gem} = 13.5$  Hz,  $J_{Ph-CHa,5} = 3.5$  Hz, 1H, Ph-CHa), 2.98 (dd,  $J_{gem} = 13.5$  Hz,  $J_{Ph-CHb,5} = 7.9$  Hz, 1H, Ph-CHb), 2.56 (ddd,  $J_{gem} = 13.2$  Hz,  $J_{4a,3} = 10.0$  Hz,  $J_{4a,5} = 8.6$  Hz, 1H, H-4a), 2.34-2.18 (m, 1H *overlapped*, H-4b) ppm.

minor: δ 7.72–7.66 (m, 2H, 2×Ar), 7.58–7.50 (m, 1H *overlapped*, Ar), 7.47–7.39 (m, 2H *overlapped*, 2×Ar), 7.38–7.21 (m, 5H *overlapped*, Ar), 4.62 (dddd,  $J_{5,Ph-CHb,5} = 9.8$  Hz,  $J_{5,4} = 7.5$  Hz,  $J_{5,4} = 7.0$  Hz,  $J_{5,Ph-CHb,5} = 3.6$  Hz, 1H, H-5), 3.80 (s, 3H, COOCH<sub>3</sub>), 3.53 (dd,  $J_{3,4a} = 9.8$  Hz,  $J_{3,4b} = 8.4$  Hz, 1H, H-3), 3.48 (dd,  $J_{gem} = 13.2$  Hz,  $J_{Ph-CHa,5} = 3.6$  Hz, 1H, Ph-CHa), 2.78 (dd,  $J_{gem} = 12.9$  Hz,  $J_{Ph-CHb,5} = 9.9$  Hz, 1H, Ph-CHb), 2.34-2.18 (m, 2H *overlapped*, H-4a,b) ppm.

#### <sup>13</sup>C NMR (101 MHz, CDCl<sub>3</sub>)

major: δ 170.02 (C=O), 169.50 (C=O), 168.97 (C=O), 136.17 (C), 134.13 (C), 132.12 (CH-Ar), 129.67 (2×CH-Ar), 128.80 (2×CH-Ar), 128.79 (2×CH-Ar), 127.88 (2×CH-Ar), 127.19 (CH-Ar), 56.60 (CH-5), 52.83 (COOCH<sub>3</sub>), 48.84 (CH-3), 38.99 (Ph-CH<sub>2</sub>), 26.31 (CH<sub>2</sub>-4) ppm.

minor: δ 170.93 (C=O), 170.16 (C=O), 170.10 (C=O), 136.39 (C), 144.09 (C), 132.69 (CH-Ar), 129.59 (2×CH-Ar), 129.38 (2×CH-Ar), 128.64 (2×CH-Ar), 128.01 (2×CH-Ar), 126.89 (CH-Ar), 57.24 (CH-5), 52.98 (COOCH<sub>3</sub>), 49.12 (CH-3), 39.20 (Ph-CH<sub>2</sub>), 26.38 (CH<sub>2</sub>-4) ppm.

**HRMS** (ESI)  $m/z$  calcd for C<sub>20</sub>H<sub>19</sub>O<sub>4</sub>NNa<sup>+</sup> [M+Na]<sup>+</sup> 360.1206; found 360.1204.

<sup>2</sup> E. J. Thomas and M. Willis, *Organic & Biomolecular Chemistry*, 2014, **12**, 7537-7550; this approach furnished easily separable mixture and higher yields compared to BzCl/NaH procedure.

<sup>3</sup> S. A. Harkin, O. Singh and E. J. Thomas, *Journal of the Chemical Society, Perkin Transactions I*, 1984, 1489-1499.

<sup>4</sup> X. Long, Y. Ding and J. Deng, *Angewandte Chemie, International Edition*, 2018, **57**, 14221-14224.

**Methyl (5S)-1-benzoyl-5-benzyl-2-oxo-3-(phenylselanyl)pyrrolidine-3-carboxylate**

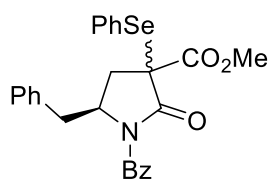

LiHMDS (4.5 mL, 4.5 mmol, 1M in THF) was added dropwise to a stirred solution of **S4** (1.71 g, 5.1 mmol) in dry THF (10 mL) at  $-78^{\circ}\text{C}$  under argon atmosphere. After 40 min, a solution of PhSeCl (0.86 g, 4.5 mmol) in dry THF (9 mL) was added dropwise and the reaction mixture was stirred at  $-78^{\circ}\text{C}$  until full conversion (3-4 h, TLC, hexanes/EtOAc : 5/1). Then, solution of  $\text{NH}_4\text{Cl}$  (10 mL) was added, the resulting mixture was warmed to RT, poured into a solution of  $\text{NH}_4\text{Cl}$  (40 mL) and extracted with EtOAc ( $2 \times 15$  mL). The organics were combined, washed with brine (10 mL), dried ( $\text{Na}_2\text{SO}_4$ ) and concentrated under reduced pressure. Column chromatography of the residue on silica gel (12-15% EtOAc in hexanes) furnished the **5** (2.32 g, 93%) as a 1.7/1 diastereomeric mixture, red-brown dense oil.

$^1\text{H NMR}$  (400 MHz,  $\text{CDCl}_3$ )

major:  $\delta$  7.74–7.21 (m, 13H *overlapped*,  $13 \times \text{Ar}$ ), 7.18–7.12 (m, 2H,  $2 \times \text{Ar}$ ), 4.41–4.30 (m, 1H, H-5), 3.76 (s, 3H,  $\text{COOCH}_3$ ), 3.30 (m, 1H *overlapped*, Ph-CHa), 2.68–2.54 (m, 2H *overlapped* Ph-CHb, H-4a), 2.25–2.17 (m, 1H *overlapped*, H-4b) ppm.

minor: 7.74–7.21 (m, 13H *overlapped*,  $13 \times \text{Ar}$ ), 7.12–7.07 (m, 2H,  $2 \times \text{Ar}$ ), 4.63 (dtd,  $J_1 = 9.4$  Hz,  $J_2 = 7.4$  Hz,  $J_3 = 3.4$  Hz, 1H, H-5), 3.66 (s, 3H,  $\text{COOCH}_3$ ), 3.30 (m, 1H *overlapped*, Ph-CHa), 2.73 (dd,  $J_{\text{gem}} = 14.4$  Hz,  $J_{\text{Ph-CHb,5}} = 7.6$  Hz, 1H, Ph-CHb), 2.68–2.54 (m, 1H *overlapped*, H-4a), 2.25–2.17 (m, 1H *overlapped*, H-4b) ppm.

$^{13}\text{C NMR}$  (101 MHz,  $\text{CDCl}_3$ )

major:  $\delta$  170.79 (C=O), 169.73 (C=O), 169.61 (C=O), 137.85 ( $2 \times \text{CH-Ar}$ ), 136.08 (CH-Ar), 134.06 (C *overlapped*), 132.56 (CH-Ar), 130.24 (CH-Ar), 129.56 ( $2 \times \text{CH-Ar}$ ), 129.39 ( $2 \times \text{CH-Ar}$ ), 129.19 ( $2 \times \text{CH-Ar}$ ), 128.62 ( $2 \times \text{CH-Ar}$ ), 127.94 ( $2 \times \text{CH-Ar overlapped}$ ), 126.92 (CH-Ar), 126.29 (C), 55.71 (CH-5), 53.71 (C-3), 53.53 ( $\text{COOCH}_3$ ), 38.46 (Ph- $\text{CH}_2$ ), 34.21 ( $\text{CH}_2$ -4) ppm.

minor:  $\delta$  171.18 (C=O), 169.86 (C=O), 169.02 (C=O), 137.89 ( $2 \times \text{CH-Ar}$ ), 135.97 (CH-Ar), 134.06 (C *overlapped*), 132.70 (CH-Ar), 130.10 (CH-Ar), 129.60 ( $2 \times \text{CH-Ar}$ ), 129.42 ( $2 \times \text{CH-Ar}$ ), 129.25 ( $2 \times \text{CH-Ar}$ ), 128.67 ( $2 \times \text{CH-Ar}$ ), 127.94 ( $2 \times \text{CH-Ar overlapped}$ ), 126.96 (CH-Ar), 125.64 (C), 55.92 (CH-5), 54.88 (C-3), 53.59 ( $\text{COOCH}_3$ ), 38.76 (Ph- $\text{CH}_2$ ), 34.35 ( $\text{CH}_2$ -4) ppm.

**HRMS** (ESI)  $m/z$  calcd for  $\text{C}_{26}\text{H}_{24}\text{O}_4\text{NSe}^+$   $[\text{M}+\text{H}]^+$  494.0865; found 494.0861.



**Scheme S2:** Screening of various conditions for epoxide rearrangement.

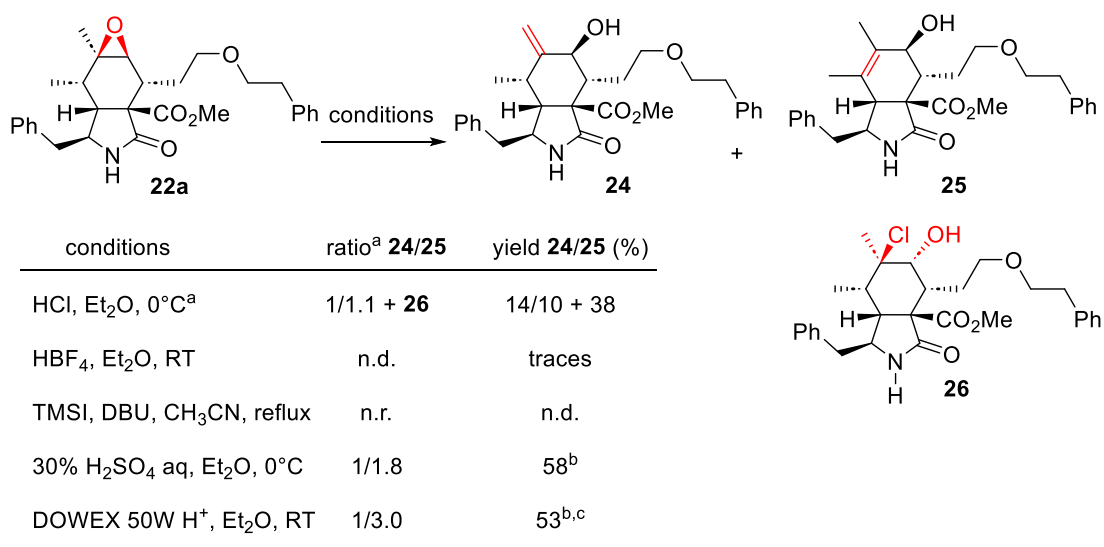

<sup>a</sup> Based on <sup>1</sup>H NMR spectra of the crude material. <sup>b</sup> Obtained as a mixture of **24** and **25**. <sup>c</sup> HPLC separation of the mixture furnished compound **25** in 13% yield. n.d. - not determined, n.r. - no reaction

**Scheme S3:** Proposed mechanism of formation of compounds **24-26** in reaction of **22a** with HCl in diethyl-ether

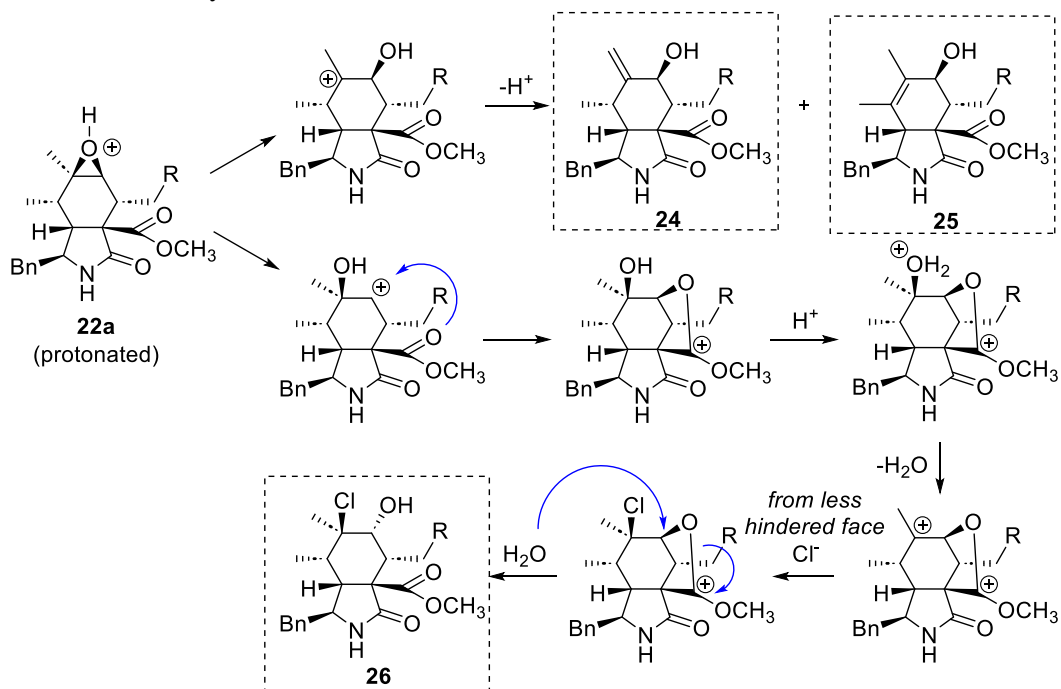

**Scheme S4:** Screening of various conditions for elimination reaction.

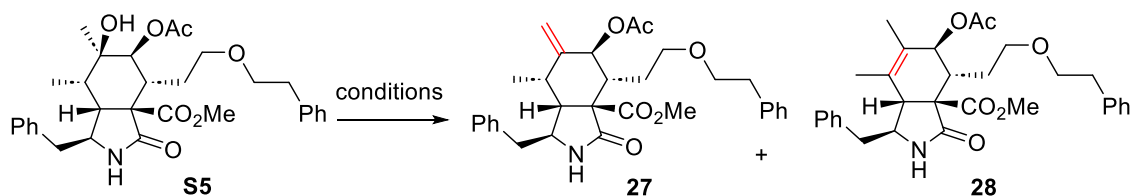

| conditions                                | ratio <sup>a</sup> <b>27/28</b> | yield of <b>27/28</b> <sup>b</sup> (%) |
|-------------------------------------------|---------------------------------|----------------------------------------|
| SOCl <sub>2</sub> , DMAP, pyridine, 0°C   | 1.6/1                           | 58                                     |
| SOCl <sub>2</sub> , DMAP, pyridine, -40°C | 2.0/1                           | 49                                     |
| SOCl <sub>2</sub> , DMAP, pyridine, +40°C | 1.3/1                           | 50                                     |
| tripphosgene, DMAP, DCM, RT               | 2.3/1                           | 15                                     |
| POCl <sub>3</sub> , pyridine, DCM, 0-35°C | n.d.                            | 0 <sup>c</sup>                         |

<sup>a</sup> Ratio based on <sup>1</sup>H NMR spectra of a crude product. <sup>b</sup> Obtained as a mixture of **27** and **28**. <sup>c</sup> Different product obtained. n.d. - not determined.

**Table S1:** Spheroid invasion assay with BLM cell line at 10  $\mu$ M concentration, 24 h.

|                    |            |            |            |            |            |            |            |            |            |            |
|--------------------|------------|------------|------------|------------|------------|------------|------------|------------|------------|------------|
| compound           | DMSO       | <b>1</b>   | <b>2</b>   | <b>17a</b> | <b>17b</b> | <b>17c</b> | <b>17d</b> | <b>17e</b> | <b>17f</b> | <b>17g</b> |
| rel. spheroid area | 1.02       | 0.26       | 0.23       | 1.21       | 1.14       | 0.93       | 1.24       | 0.96       | 0.92       | 1.17       |
| SD                 | 0.28       | 0.04       | 0.06       | 0.11       | 0.19       | 0.18       | 0.26       | 0.14       | 0.12       | 0.28       |
| compound           | <b>17f</b> | <b>17g</b> | <b>17h</b> | <b>17i</b> | <b>17j</b> | <b>20</b>  | <b>22a</b> | <b>22b</b> | <b>22h</b> | <b>23a</b> |
| rel. spheroid area | 0.92       | 1.17       | 1.05       | 1.14       | 1.12       | 0.56       | 1.11       | 1.24       | 0.98       | 1.01       |
| SD                 | 0.12       | 0.28       | 0.21       | 0.27       | 0.30       | 0.25       | 0.17       | 0.30       | 0.39       | 0.24       |
| compound           | <b>23b</b> | <b>23h</b> | <b>24</b>  | <b>25</b>  | <b>26</b>  | <b>27</b>  | <b>28</b>  | <b>29</b>  | <b>30</b>  |            |
| rel. spheroid area | 1.10       | 0.93       | 0.46       | 1.15       | 0.88       | 0.89       | 0.72       | 1.05       | 0.50       |            |
| SD                 | 0.21       | 0.38       | 0.07       | 0.30       | 0.11       | 0.27       | 0.15       | 0.22       | 0.27       |            |

**Figure S1:** Representative images of BLM cell spheroid invasion assay with or without inhibitor. Images were taken at 0 h and 24 h. using a Leica TCS SP2 microscope (5x/0.15 dry objective). DMSO (first column) was used as a control. Scale bar 500  $\mu$ m.

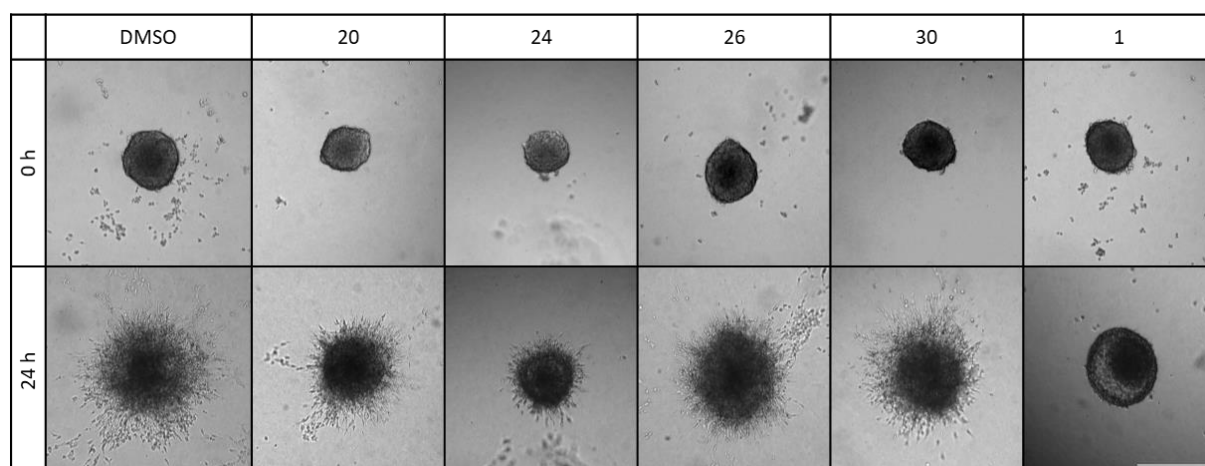

**Figure S2:** Actin polymerization assay at 10  $\mu\text{M}$  concentration. Representative graph of one measurement.

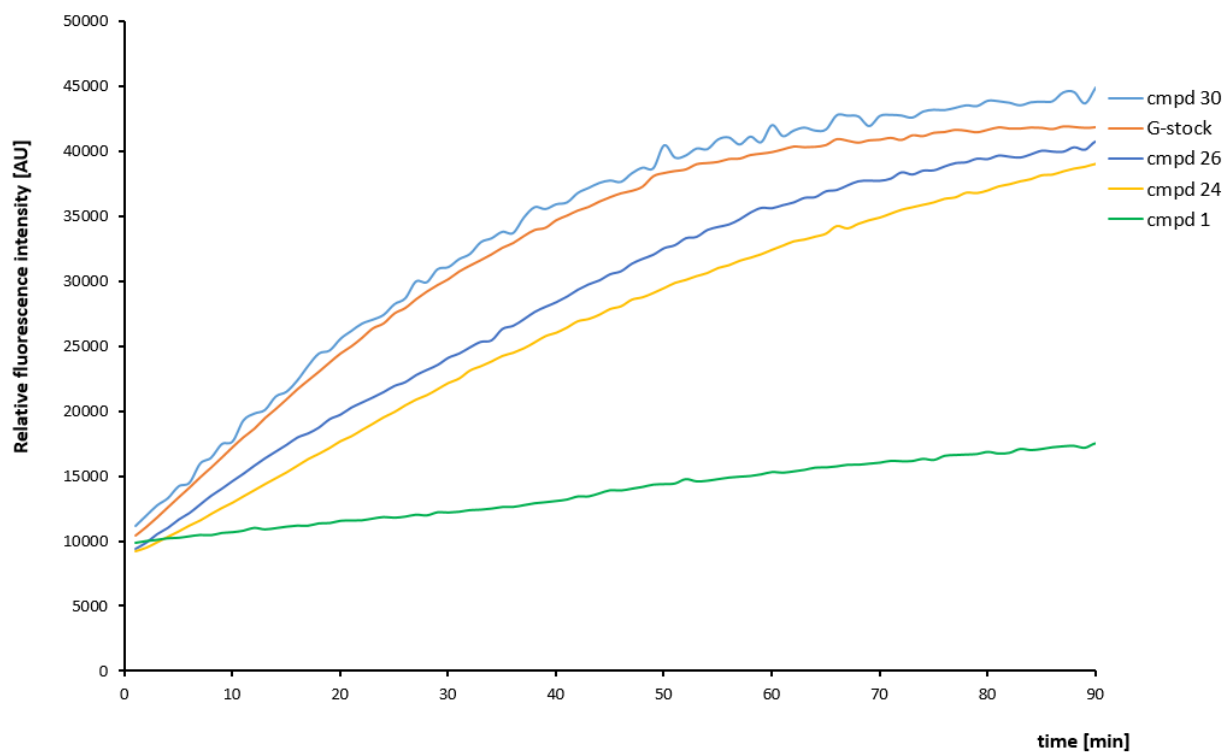

## HPLC purity of final cytochalasin analogues

### Separation conditions:

A: column 4x150 mm, 5  $\mu$ m silica gel, 60  $\text{\AA}$ , V=1 mL/min, EtOAc/hexane – 0. min 20/80, 10. min 80/20, 12.5. min 80/20.

B: column 4x100 mm, 5  $\mu$ m C18-RP, 130  $\text{\AA}$ , V=0.75 mL/min, MeOH/H<sub>2</sub>O – 0. min 60/40, 7. min 95/5, 11. min 95/5, 14. min 60/40, 20. min 60/40.

C: column 2.1x100 mm, 1.7  $\mu$ m C18-BEH, V=0.5 mL/min, ACN/H<sub>2</sub>O – 0. min 0/100, 5. min 100/0, 6. min 100/0.

| Sample | Purity (%) | Separation conditions | Retention time (min) |
|--------|------------|-----------------------|----------------------|
| 17a    | 98.8       | A                     | 9.12                 |
| 17b    | 95.5       | A                     | 9.60                 |
| 17c    | 95.1       | A                     | 8.67                 |
| 17d    | 98.3       | A                     | 9.79                 |
| 17e    | 98.9       | A                     | 9.65                 |
| 17f    | 98.8       | A                     | 8.86                 |
| 17g    | 98.0       | A                     | 10.04                |
| 17h    | 98.4       | A                     | 10.06                |
| 17i    | 98.0       | A                     | 9.72                 |
| 17j    | 99.0       | A                     | 11.38                |
| 20     | 97.1       | A                     | 7.60                 |
| 22a    | 98.4       | A                     | 10.62                |
| 22b    | 96.6       | A                     | 10.31                |
| 22h    | 99.9       | A                     | 10.57                |
| 23a    | 95.8       | C                     | 4.44                 |
| 23b    | 99.3       | A                     | 10.91                |
| 23h    | 98.9       | A                     | 10.98                |
| 24     | 99.3       | A                     | 9.98                 |
| 25     | 98.0       | B                     | 9.14                 |
| 26     | 97.6       | A                     | 7.21                 |
| 27     | 99.9       | A                     | 7.07                 |
| 28     | 97.9       | A                     | 7.77                 |
| 29     | 95.8       | B                     | 8.29                 |
| 30     | 99.9       | A                     | 13.54                |

**17a** – purity 98.8 %,  $T_R = 9.12$  min

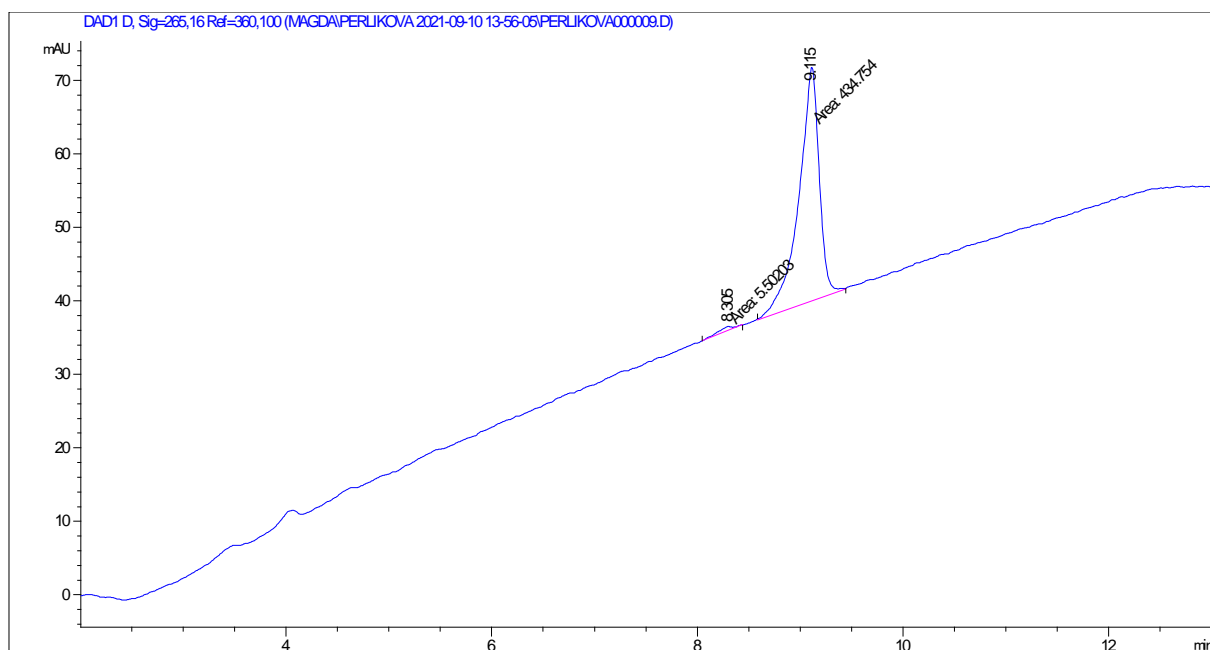

**17b** – purity 95.5 %,  $T_R = 9.60$  min

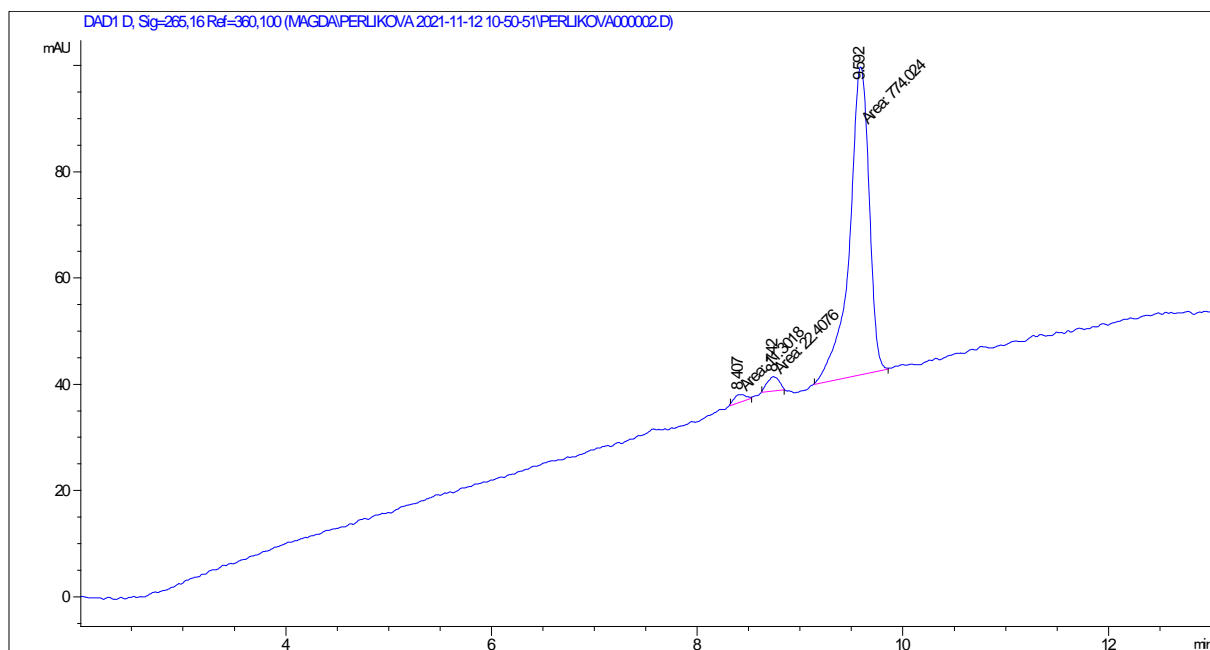

**17c** – purity 95.1 %,  $T_R = 8.67$  min

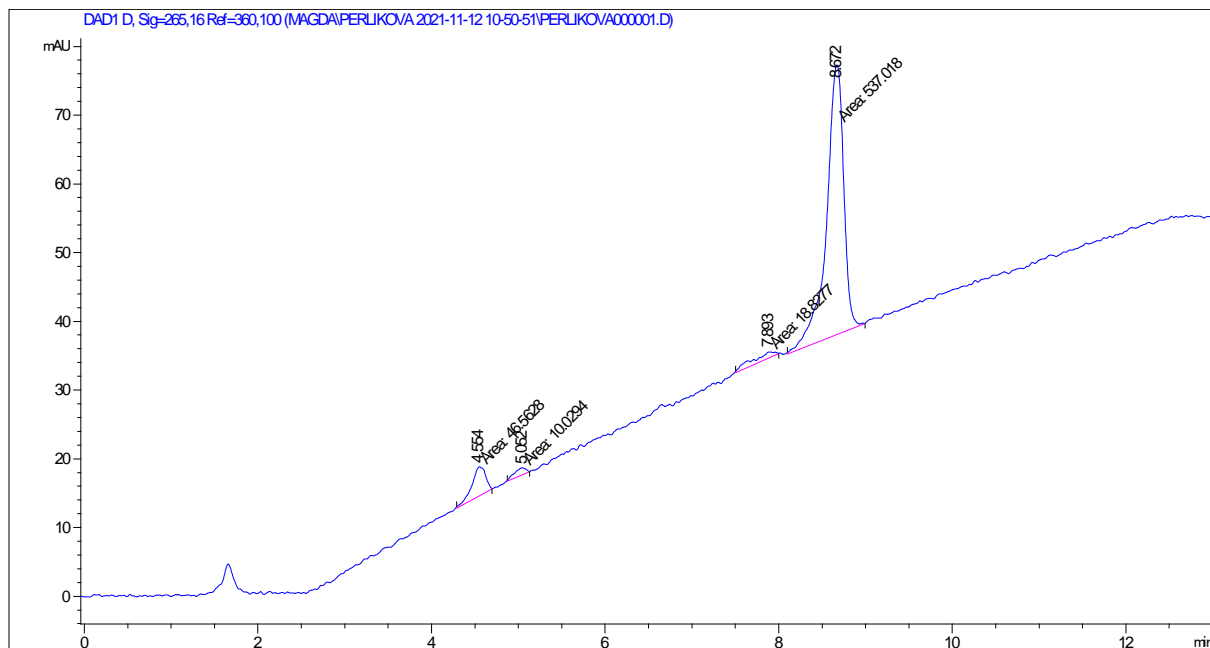

**17d** – purity 98.3 %,  $T_R = 9.79$  min

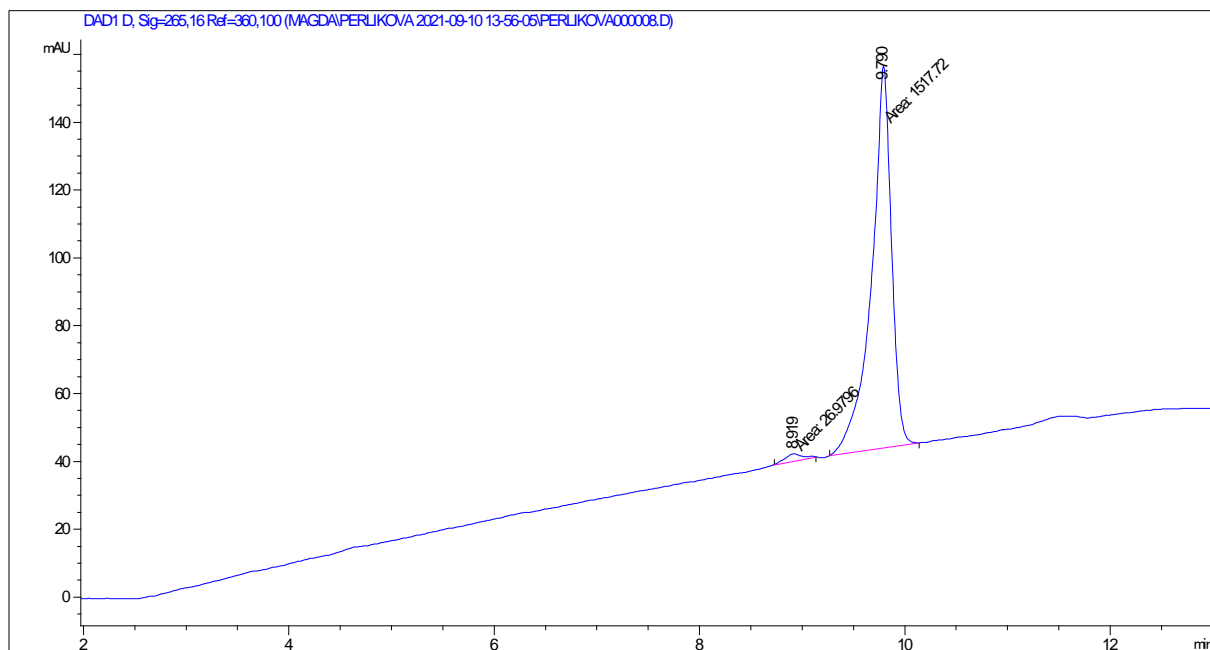

**17e** – purity 98.9 %,  $T_R = 9.65$  min

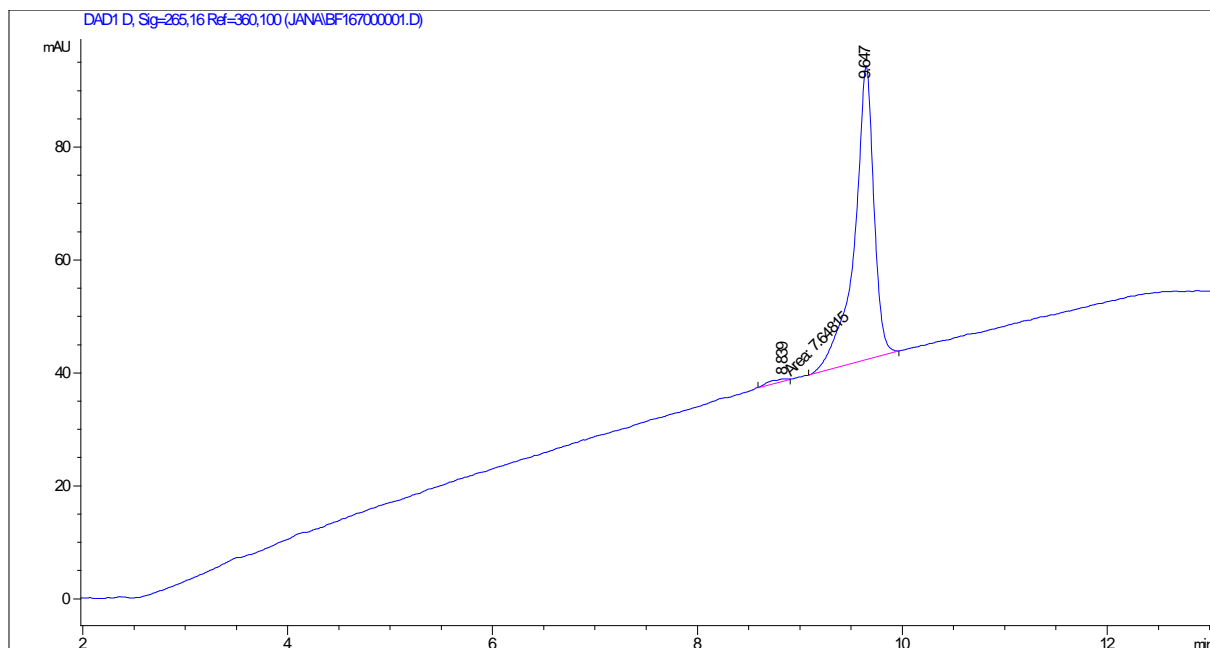

**17f** – purity 98.8 %,  $T_R = 8.86$  min

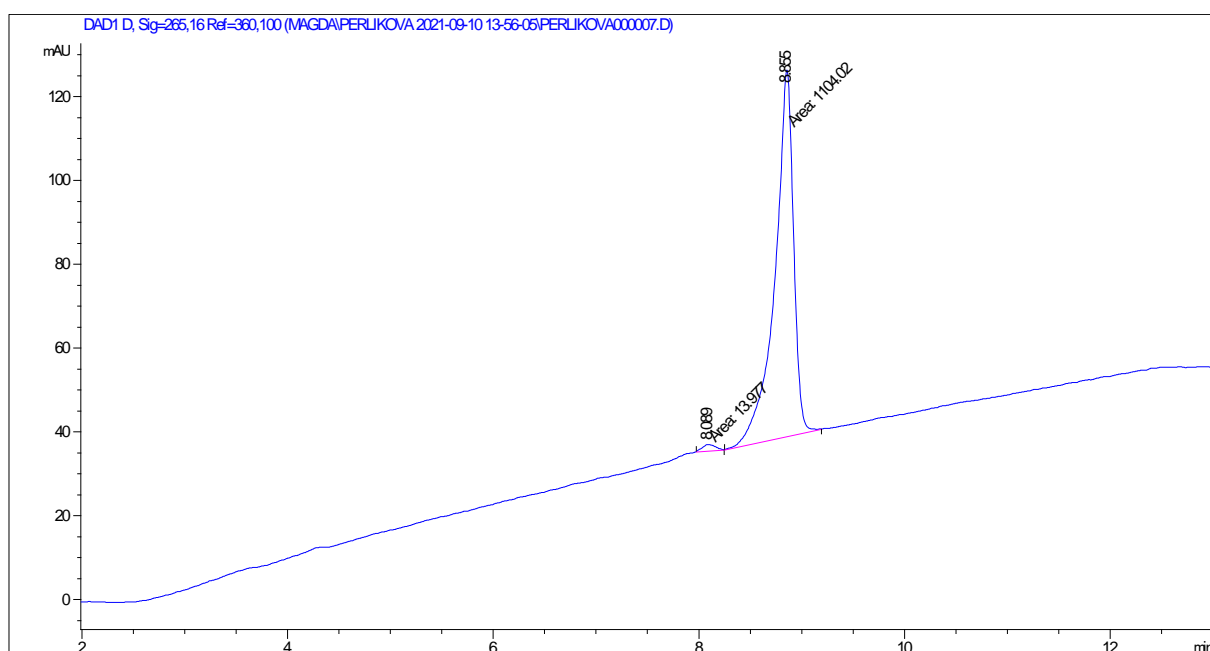



**17g** – purity 98.0 %,  $T_R = 10.04$  min

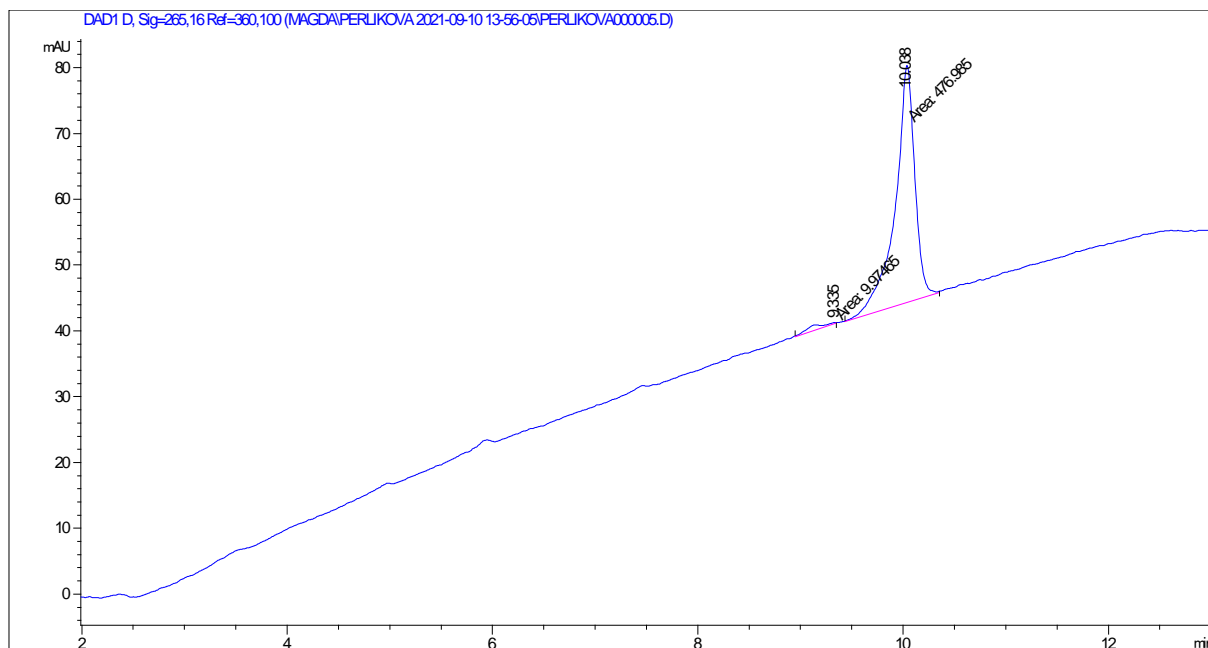

**17h** – purity 98.4 %,  $T_R = 10.06$  min

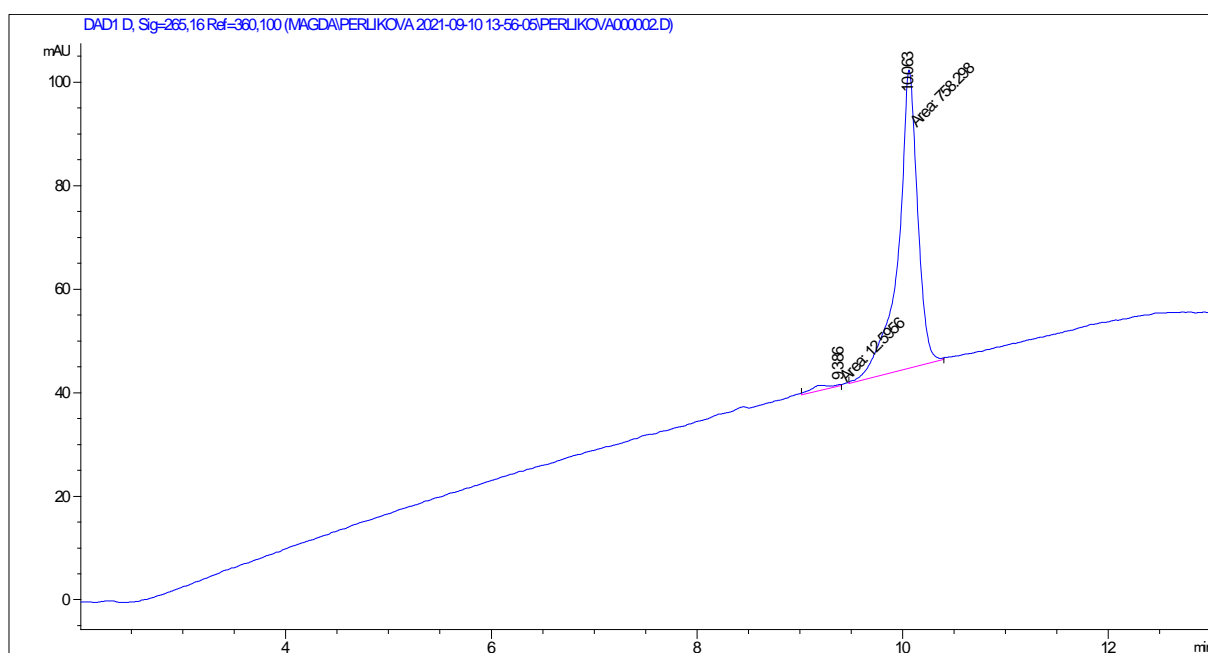

**17i** – purity 98.0 %,  $T_R = 9.72$  min

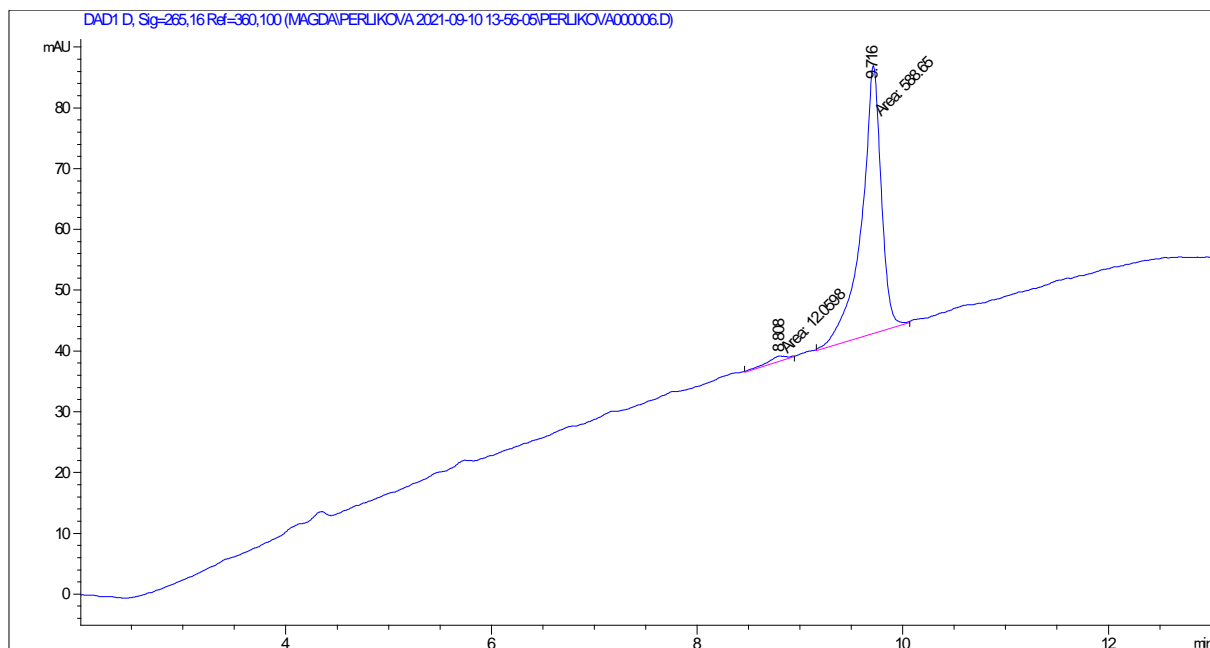

**17j** – purity 99.0 %,  $T_R = 11.38$  min

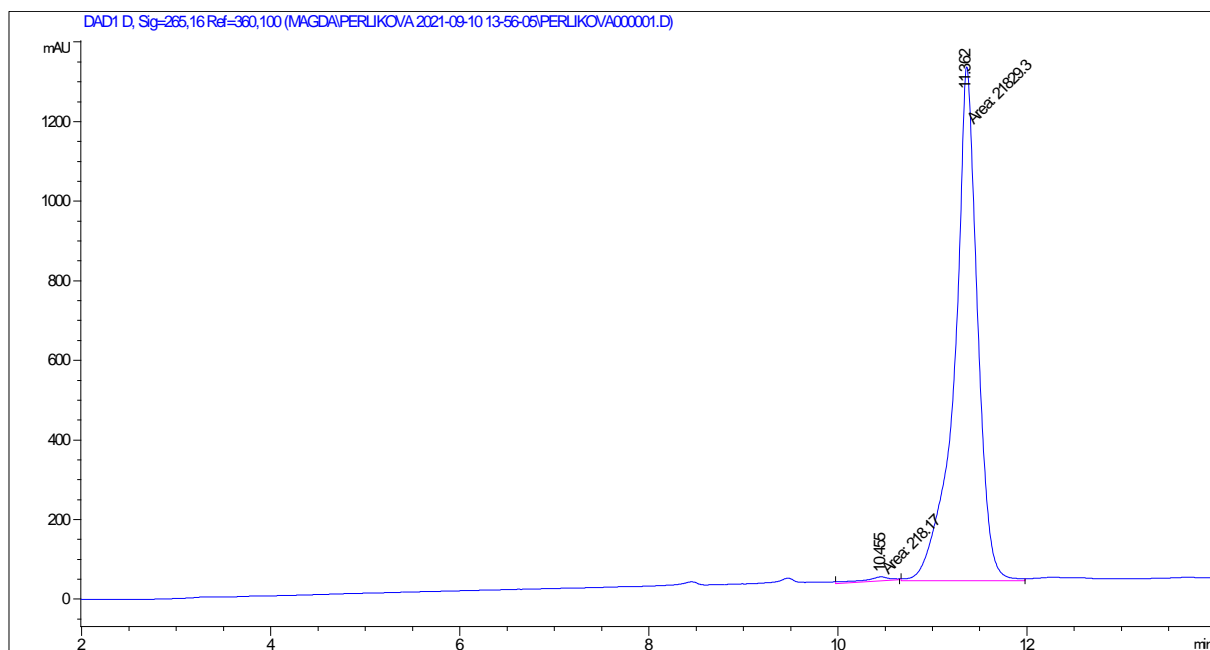

**20** – purity 97.1 %,  $T_R = 7.60$  min

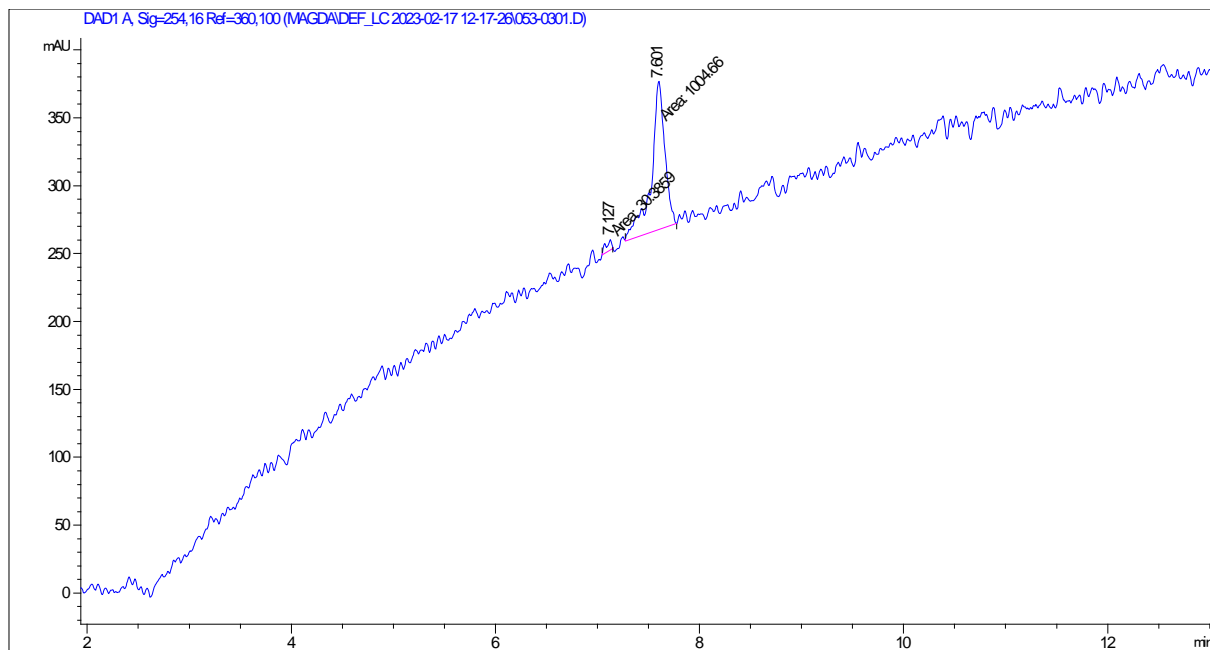

**22a** – purity 98.4 %,  $T_R = 10.62$  min

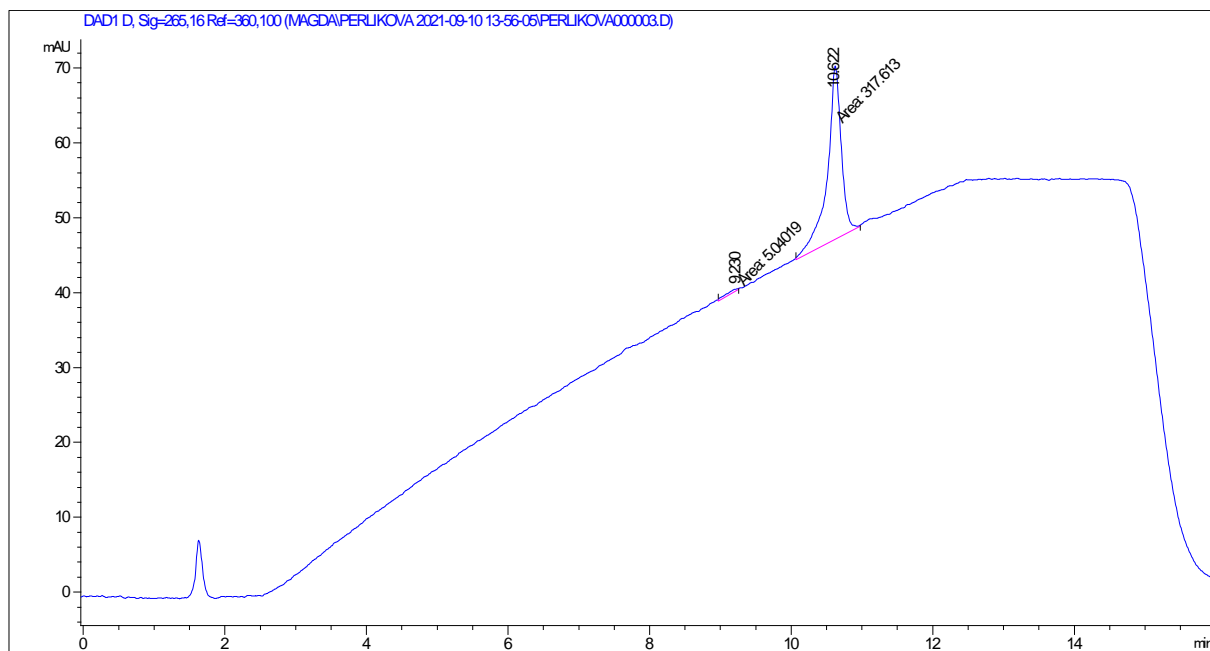

**22b** – purity 96.6 %,  $T_R = 10.31$  min

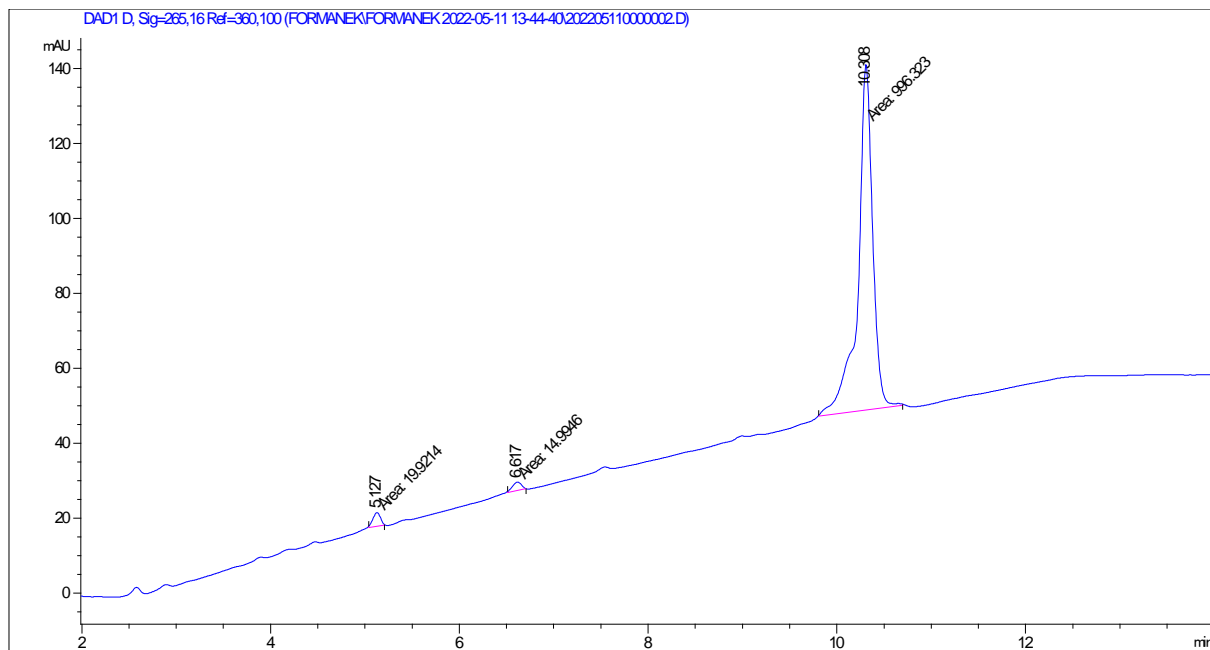

**22h** – purity 99.9 %,  $T_R = 10.57$  min

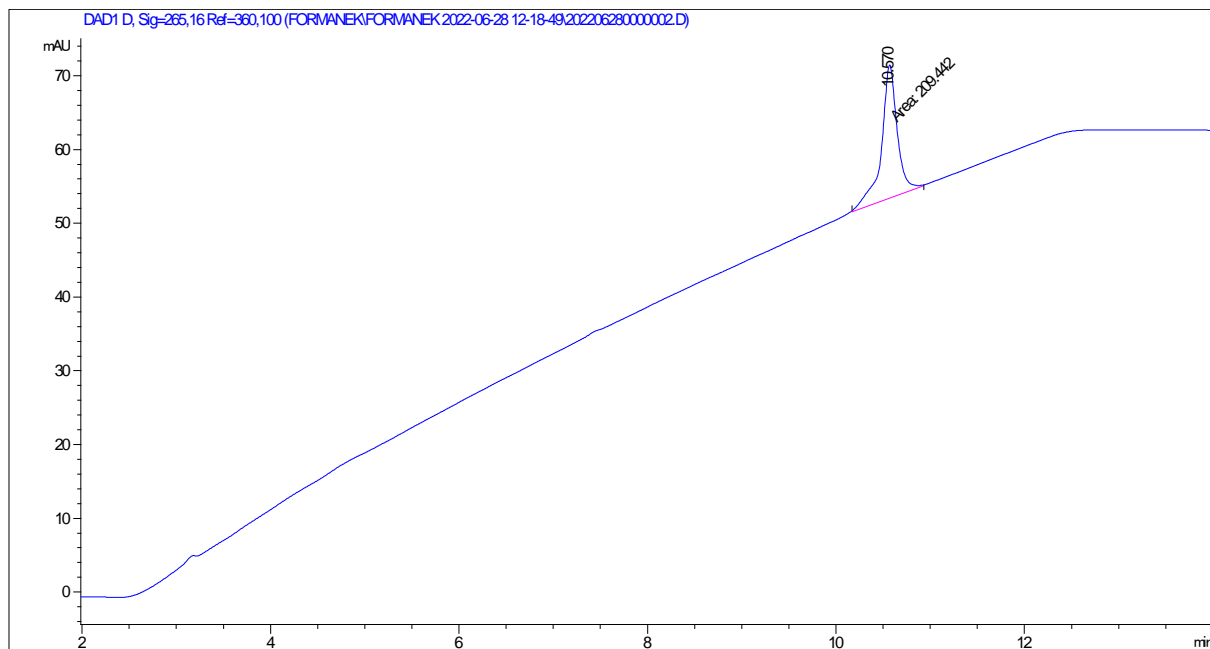

**23a** – purity 95.8 %,  $T_R = 4.44$  min

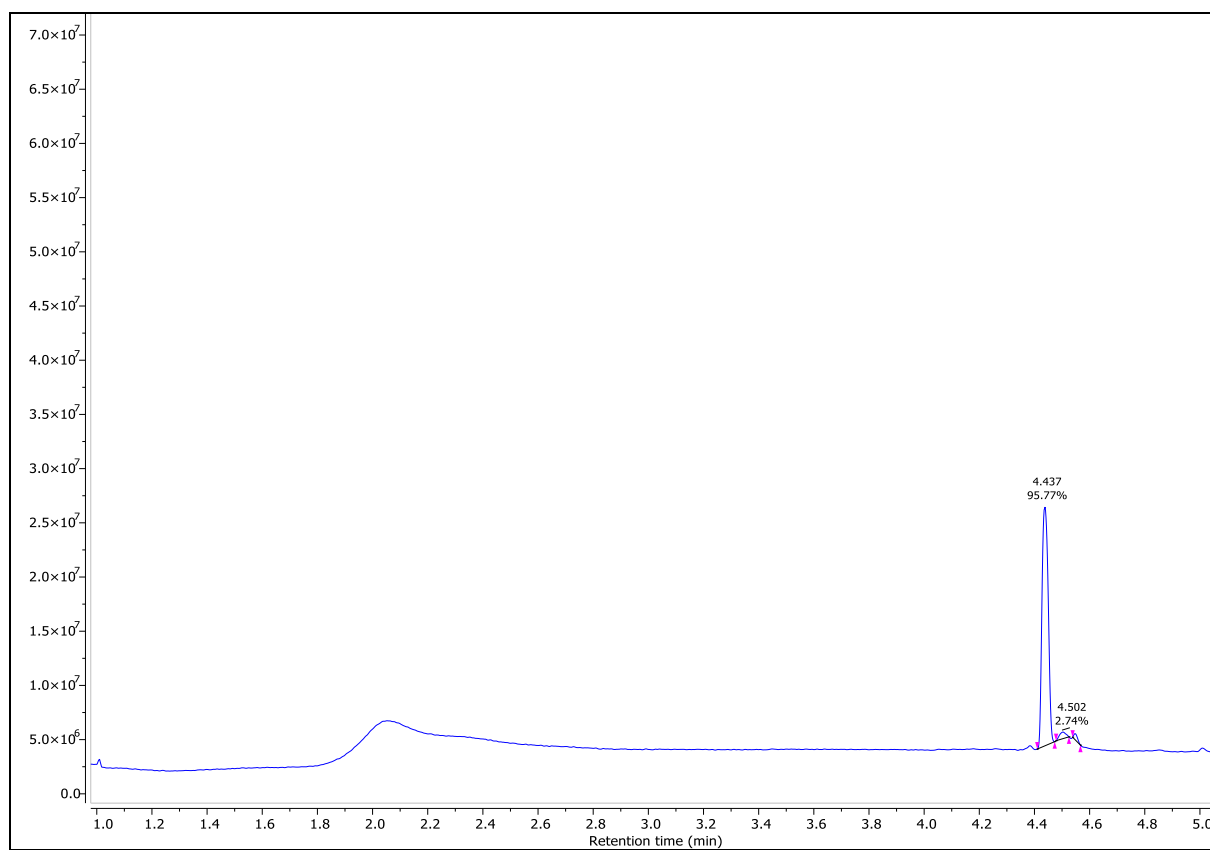

**23b** – purity 99.3 %,  $T_R = 10.91$  min

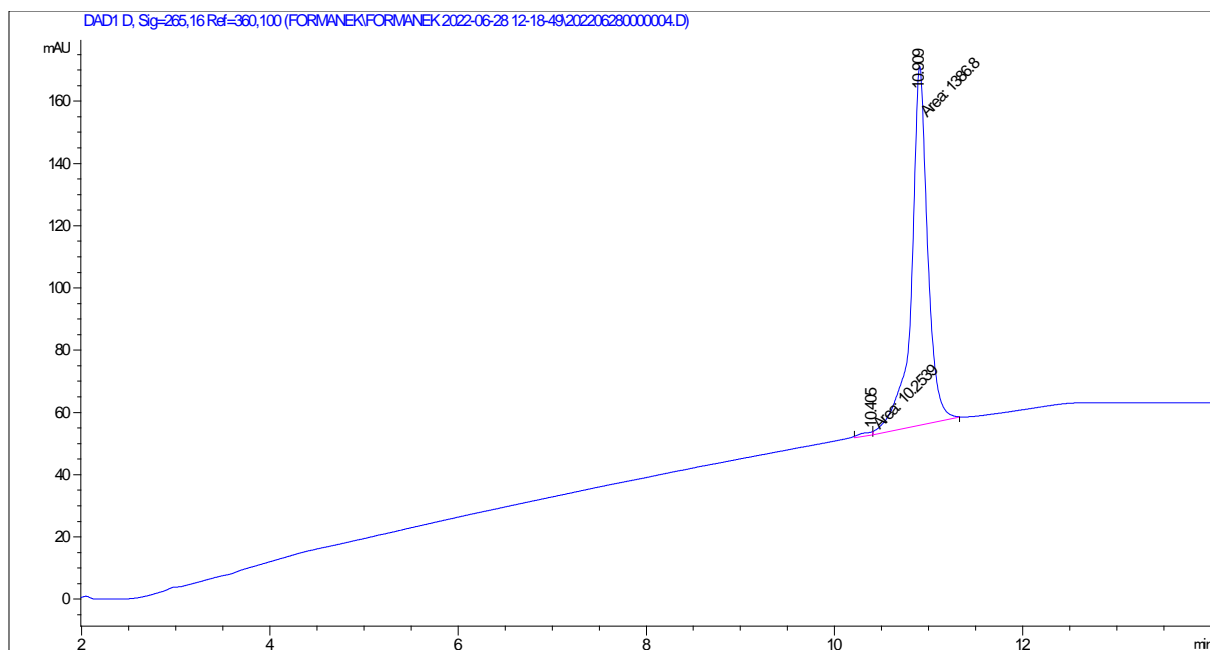

**23h** – purity 98.9 %,  $T_R = 10.98$  min

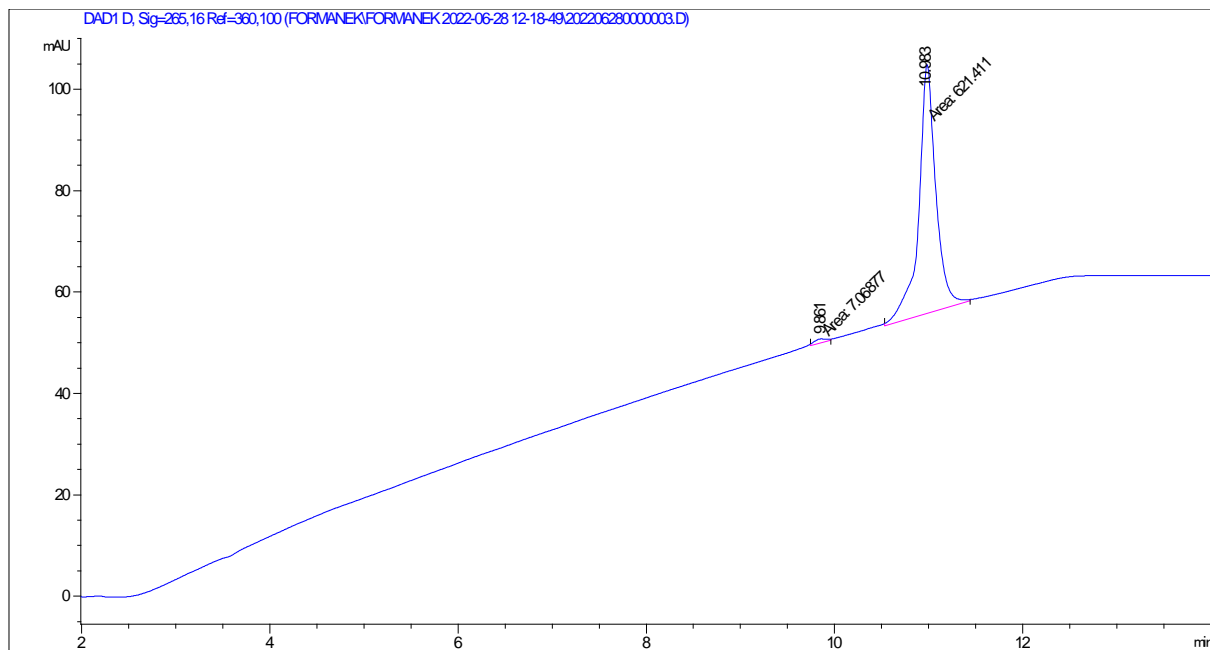

**24** – purity 99.3 %,  $T_R = 9.98$  min

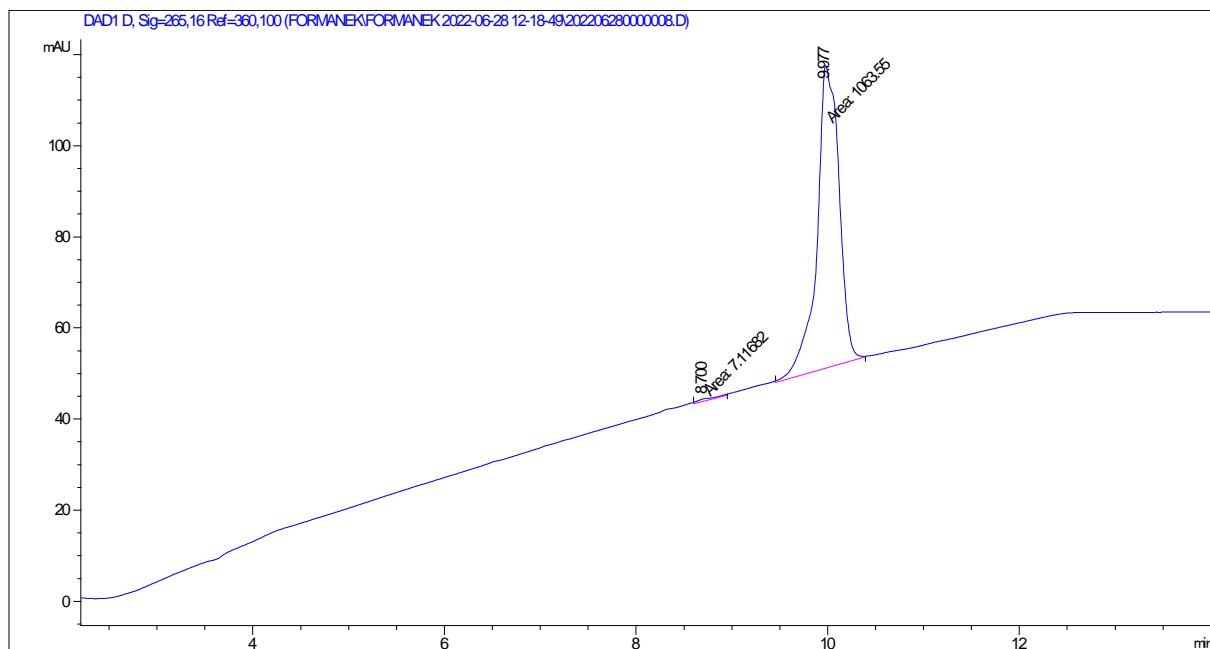

**25** – purity 98.0 %,  $T_R = 9.14$  min

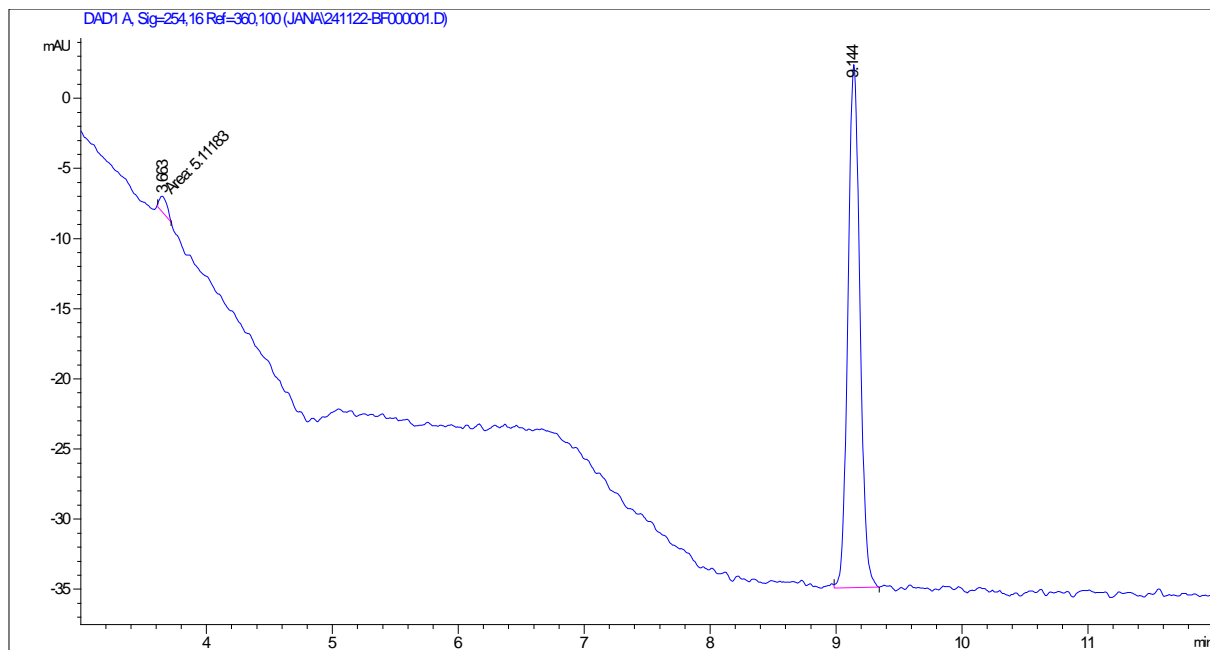

**26** – purity 97.6 %,  $T_R = 7.21$  min

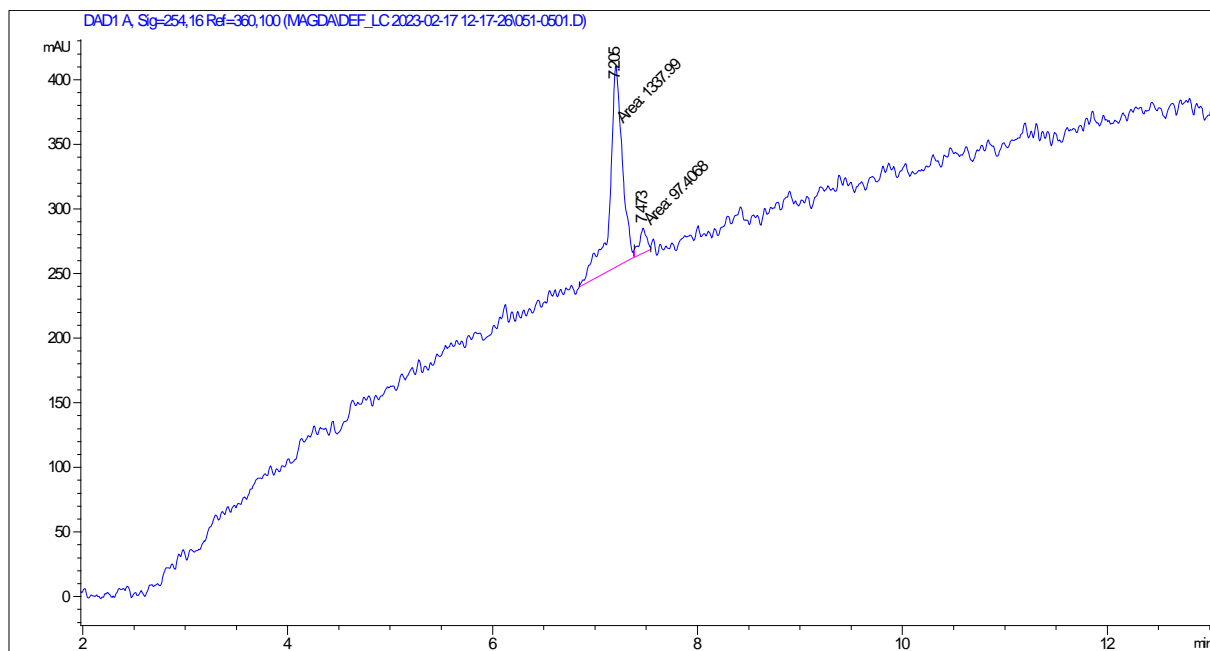

**27** – purity 99.9 %,  $T_R = 7.07$  min

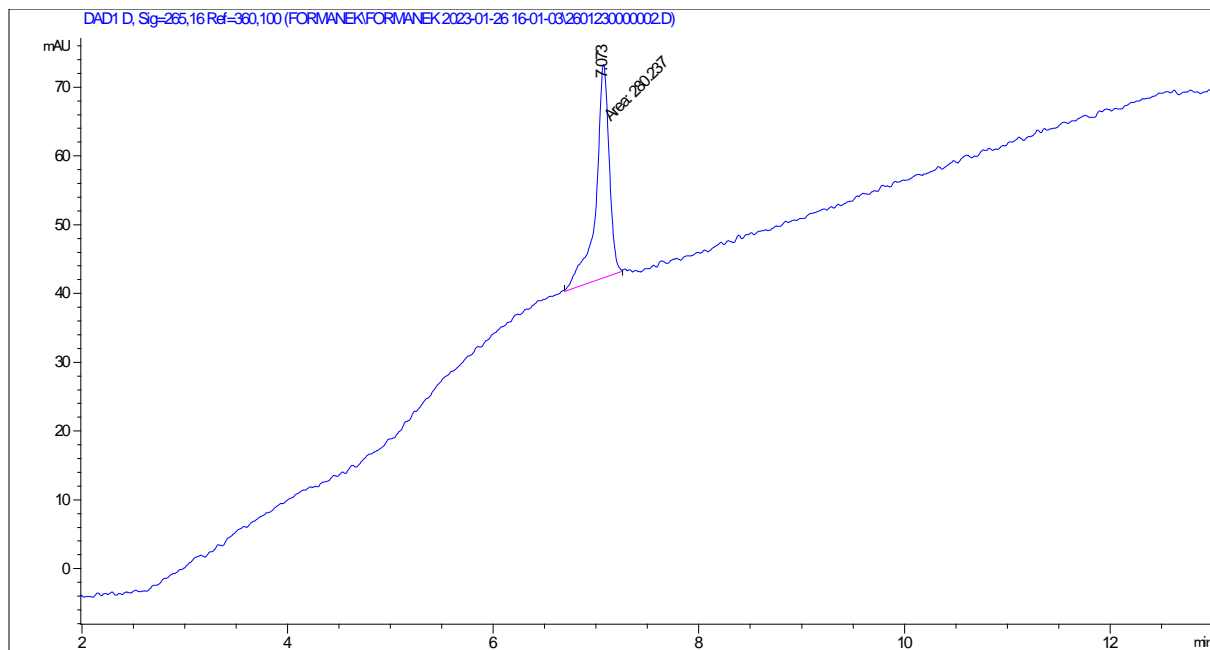

**28** – purity 97.9 %,  $T_R = 7.77$  min

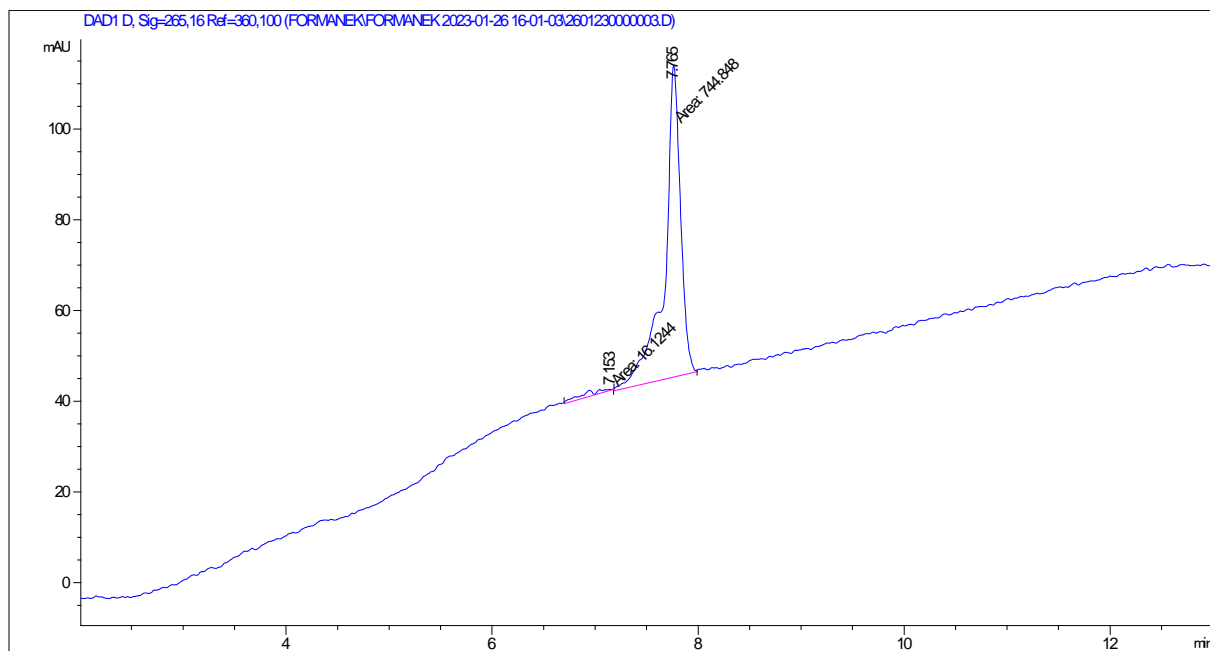



**29** – purity 95.8 %,  $T_R = 8.29$  min

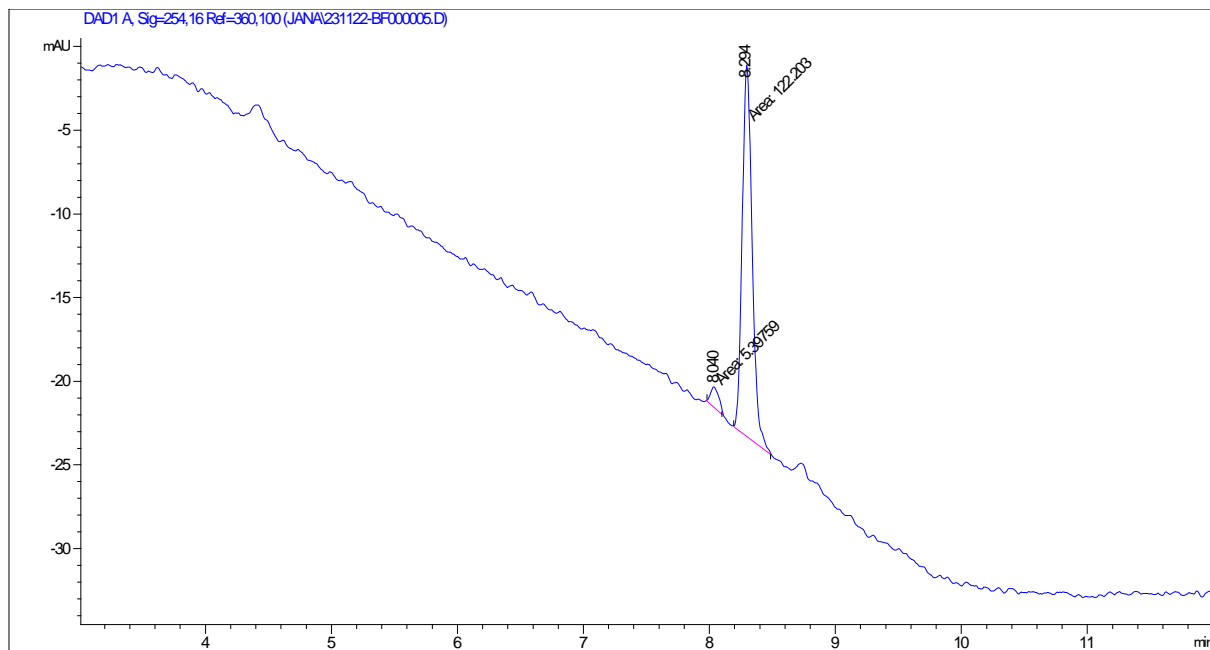

**30** – purity 99.9 %,  $T_R = 13.54$  min

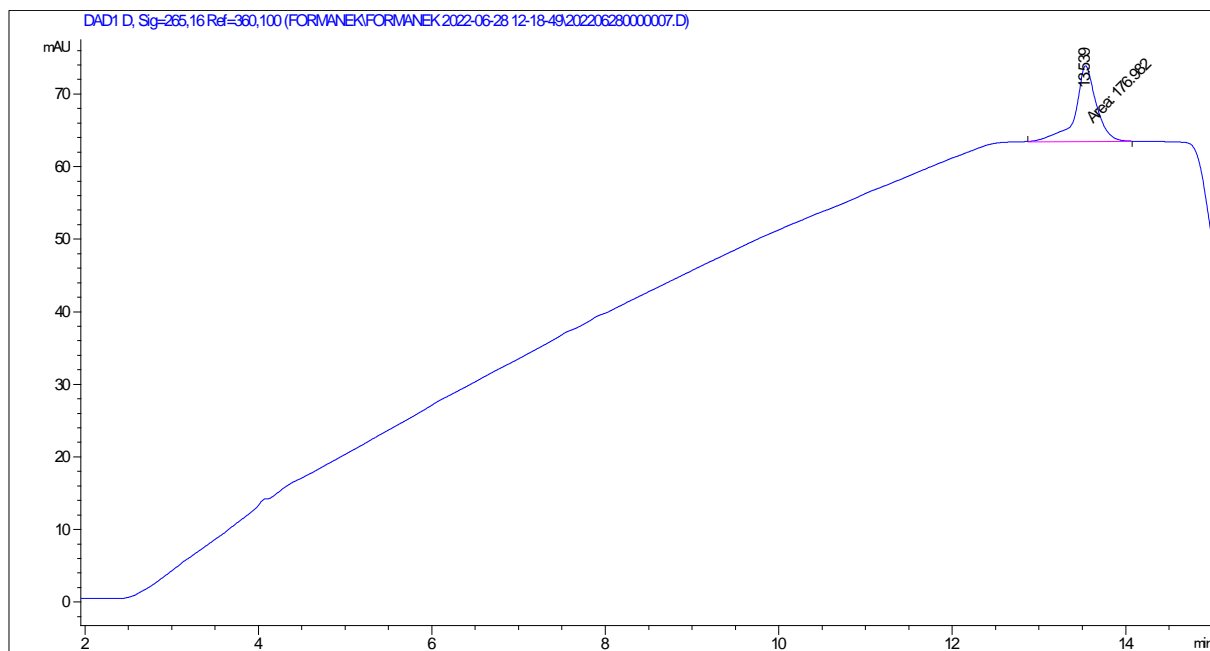

# Copies of NMR spectra

## S4

BF-21-145\_ac-ZNOVU-1H-p2

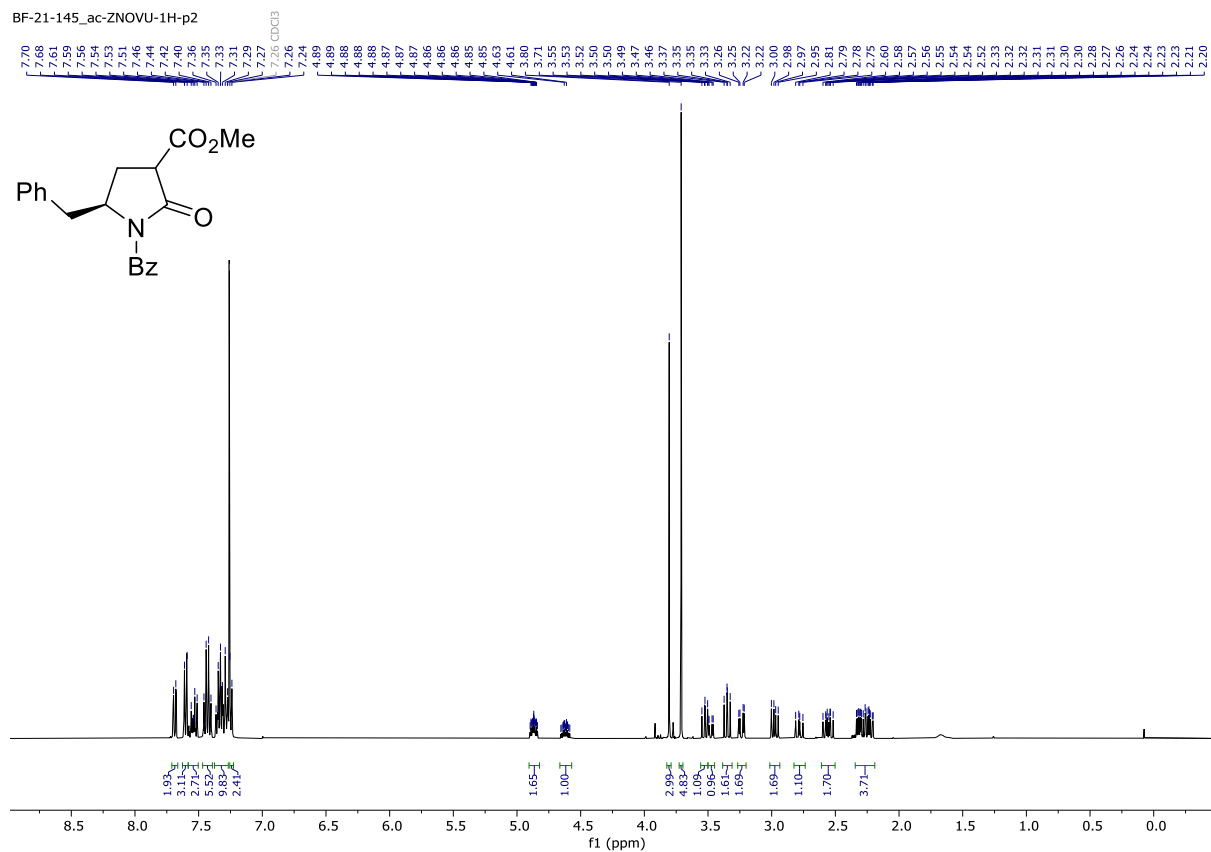

BF-21-145\_ac-ZNOVU-13C

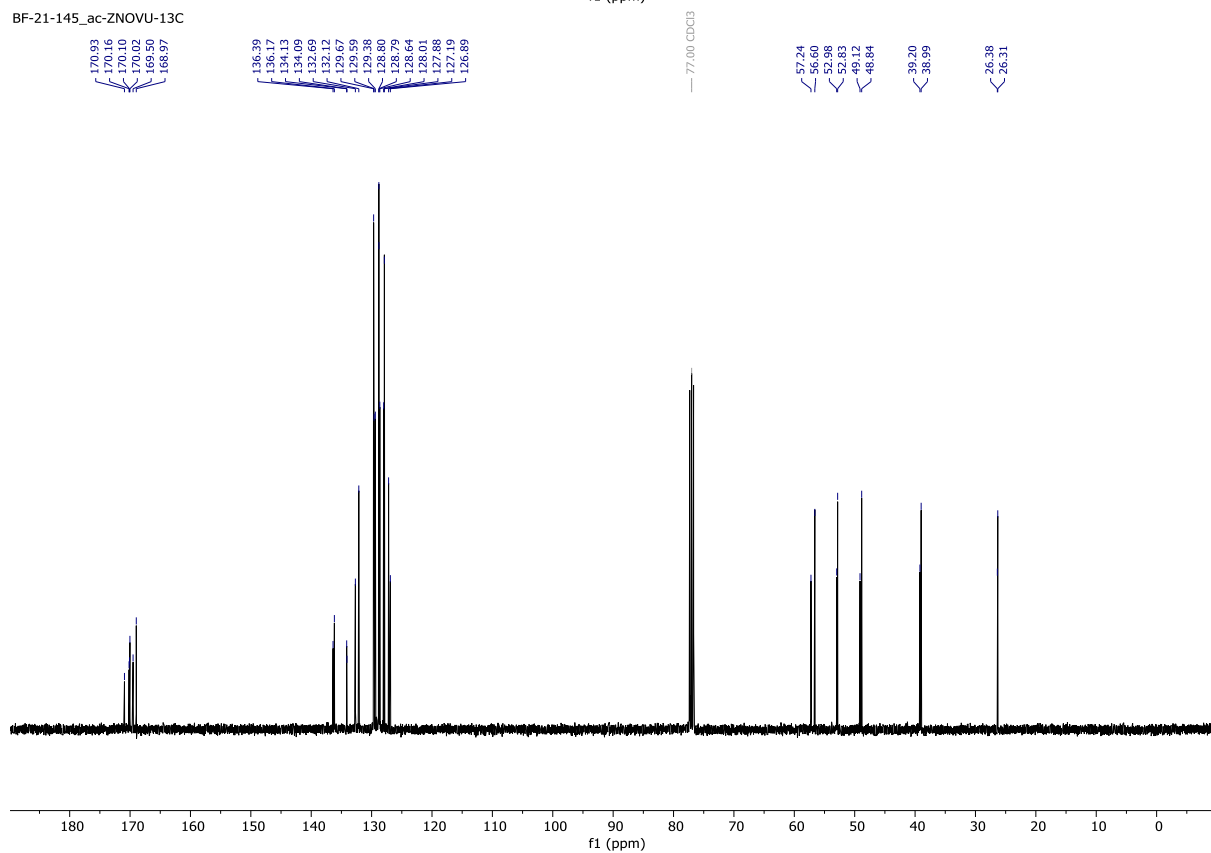

5

DD088-selenide

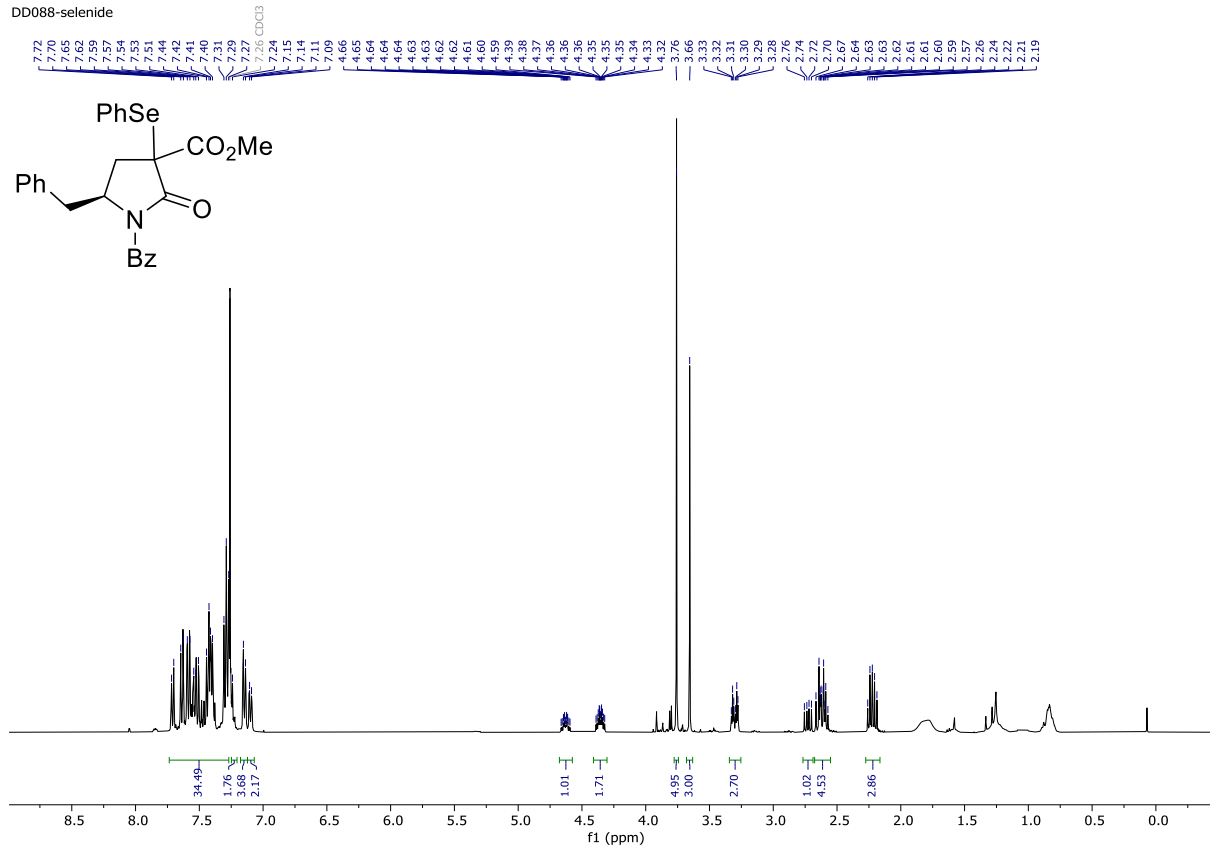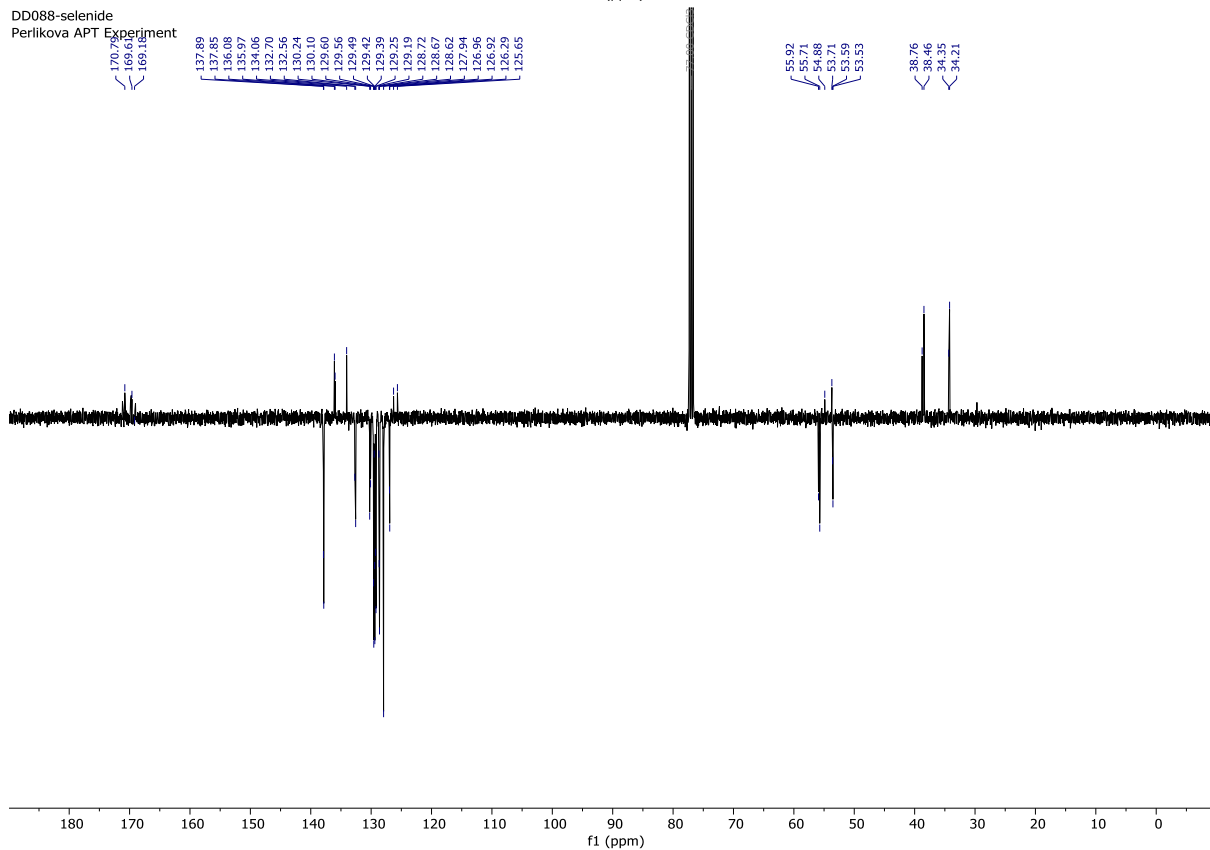

# 11

BF033.1.fid

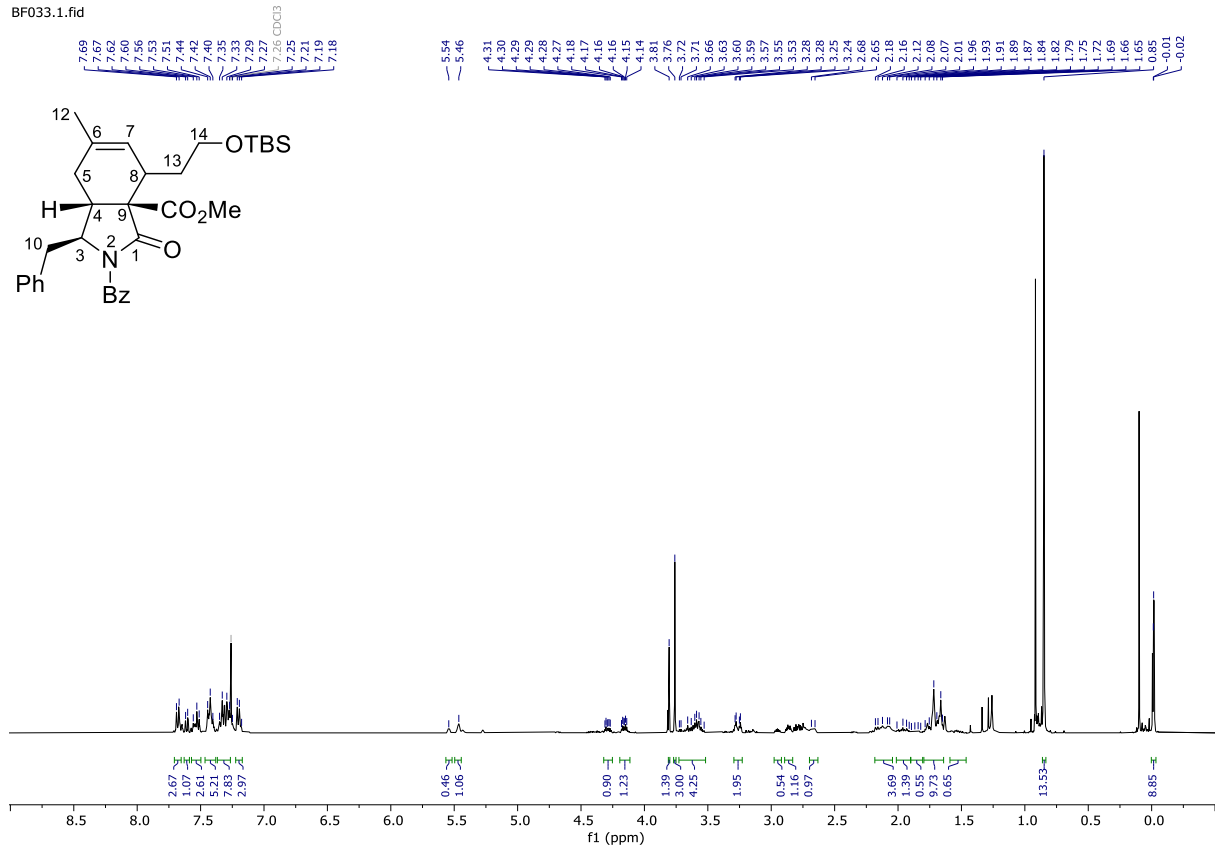

BF033.3.fid

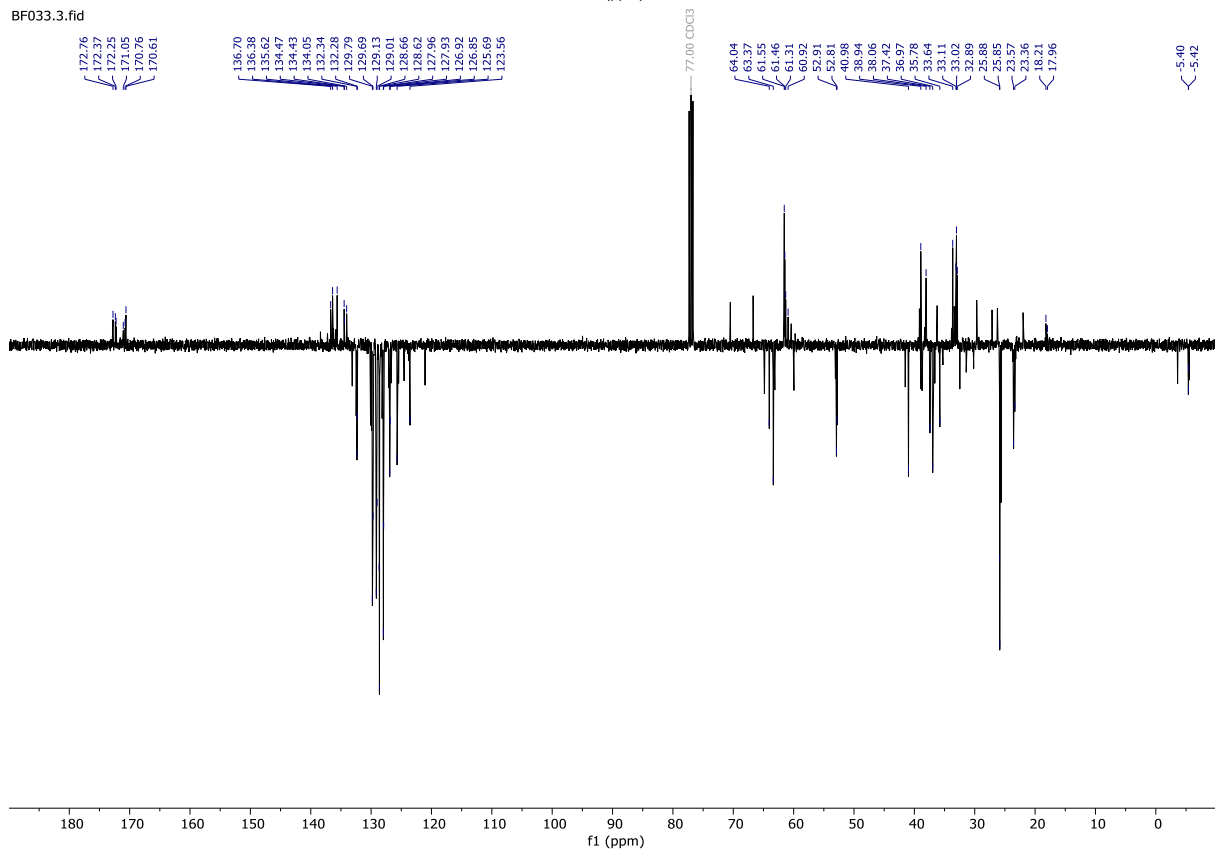

12

BF-21-070-ac-2F

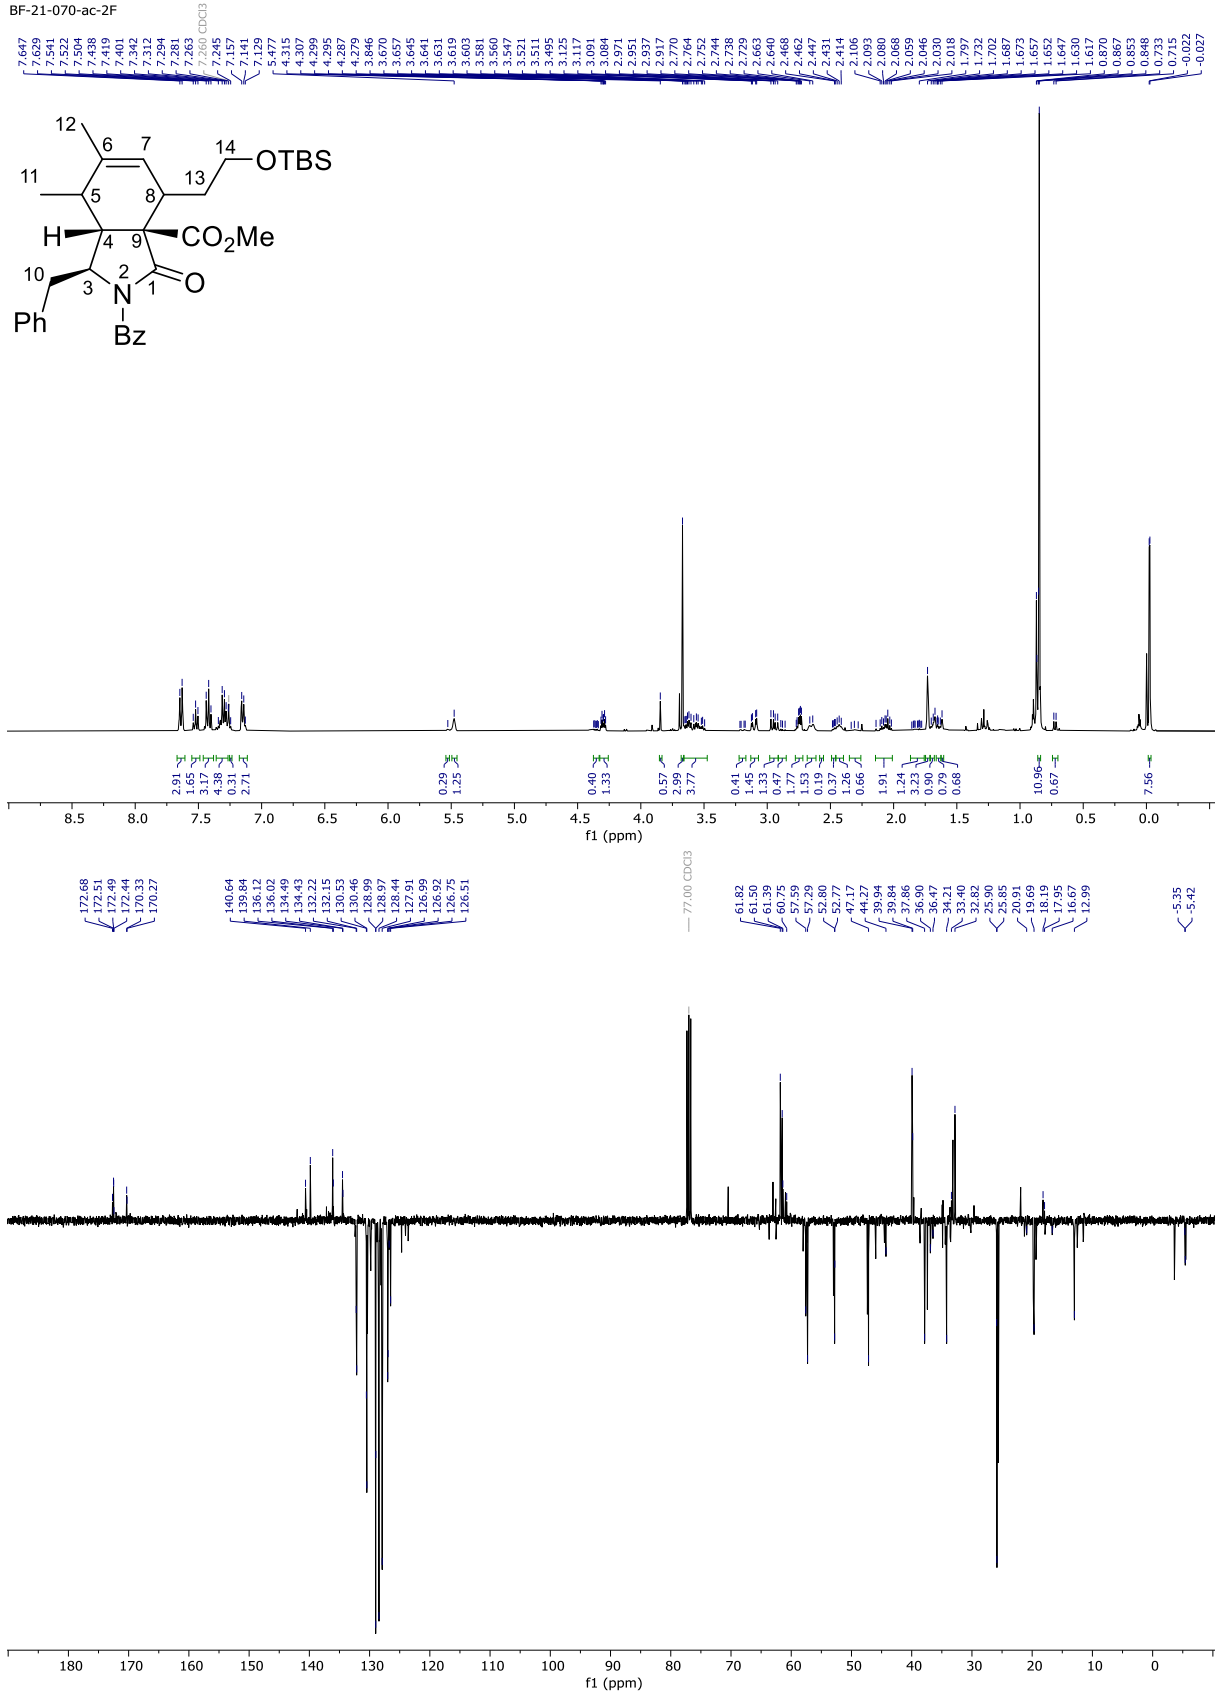



14

PAP138

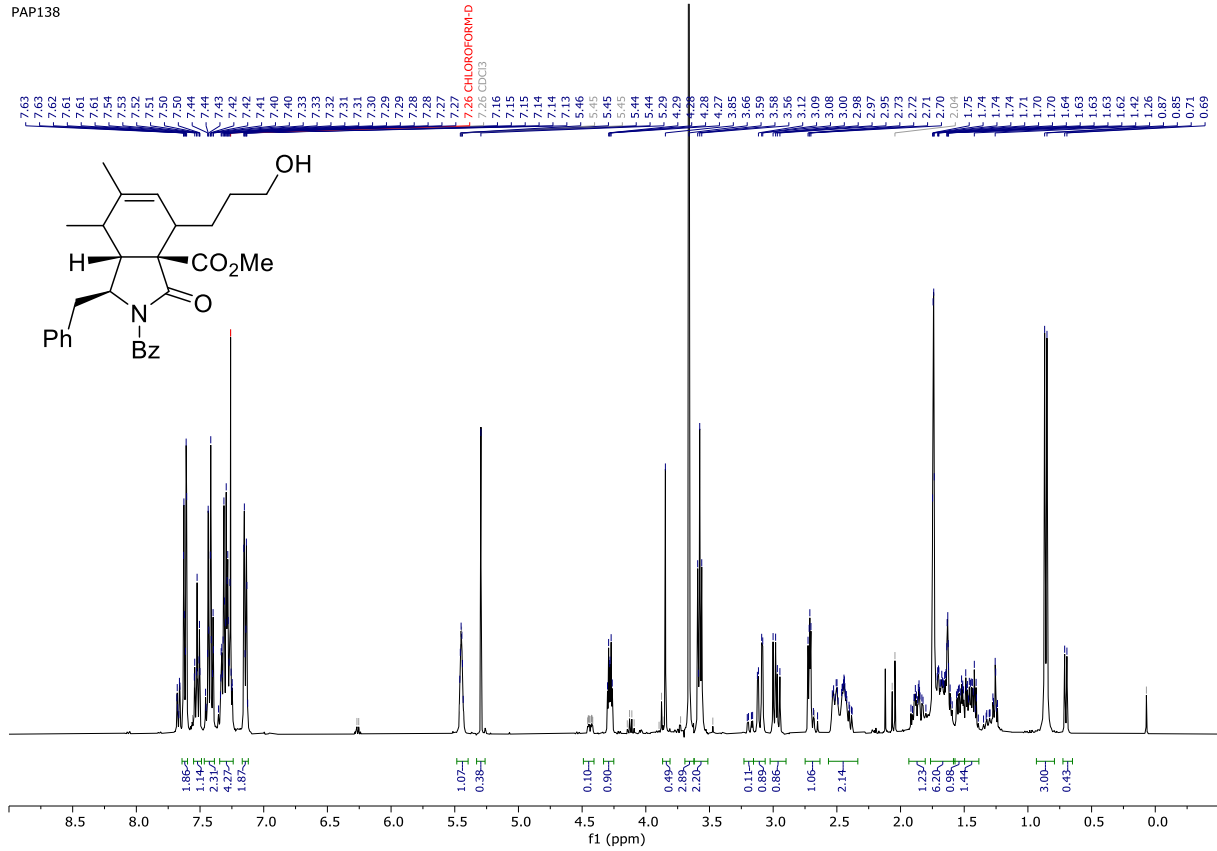

PAP138

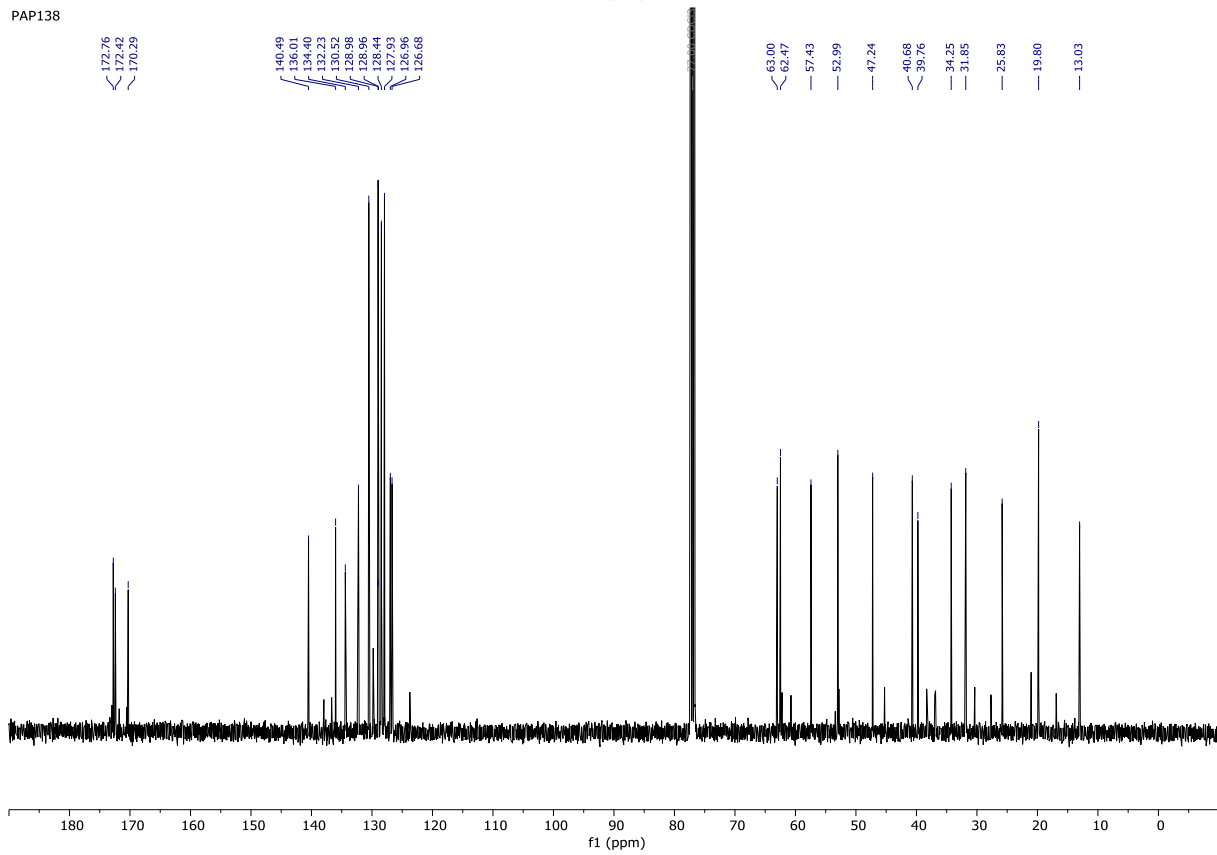

# 16a

BF-21-177\_ac3-hf

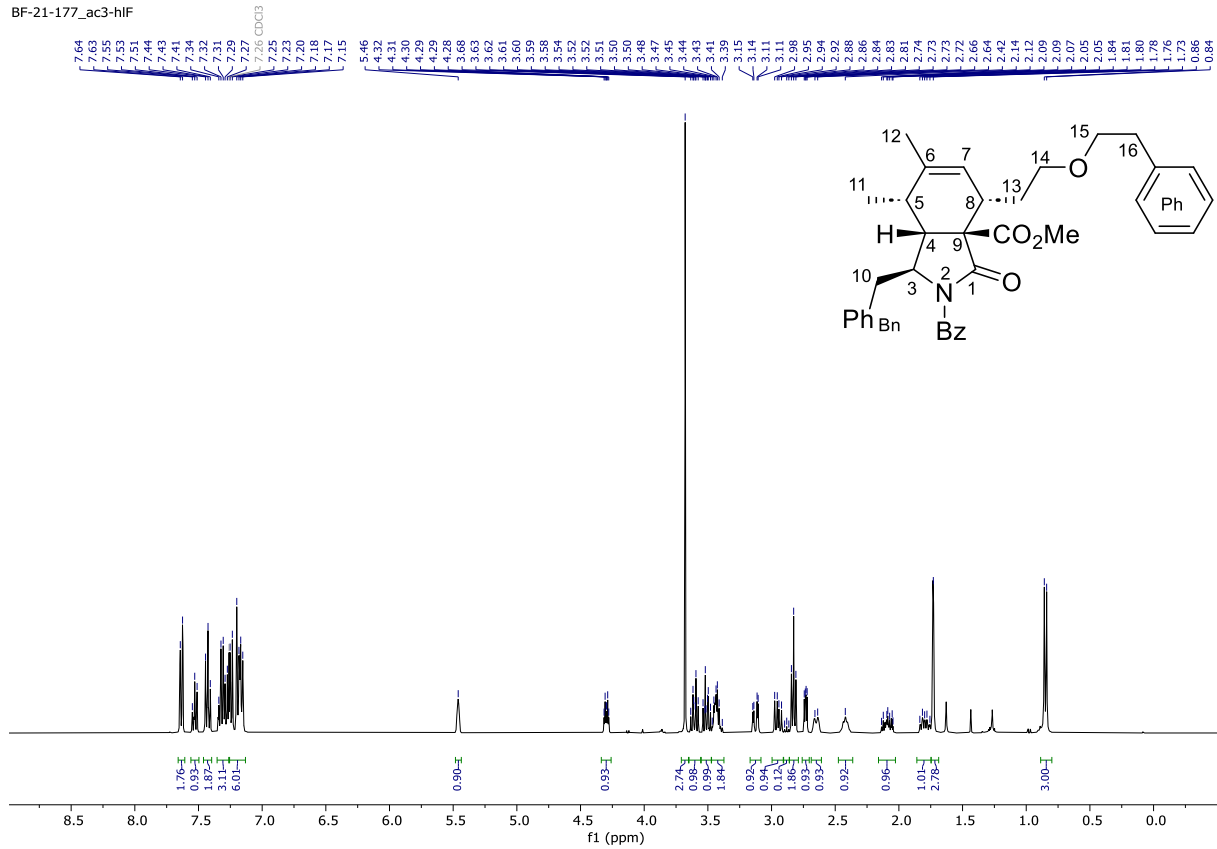

APT\_01

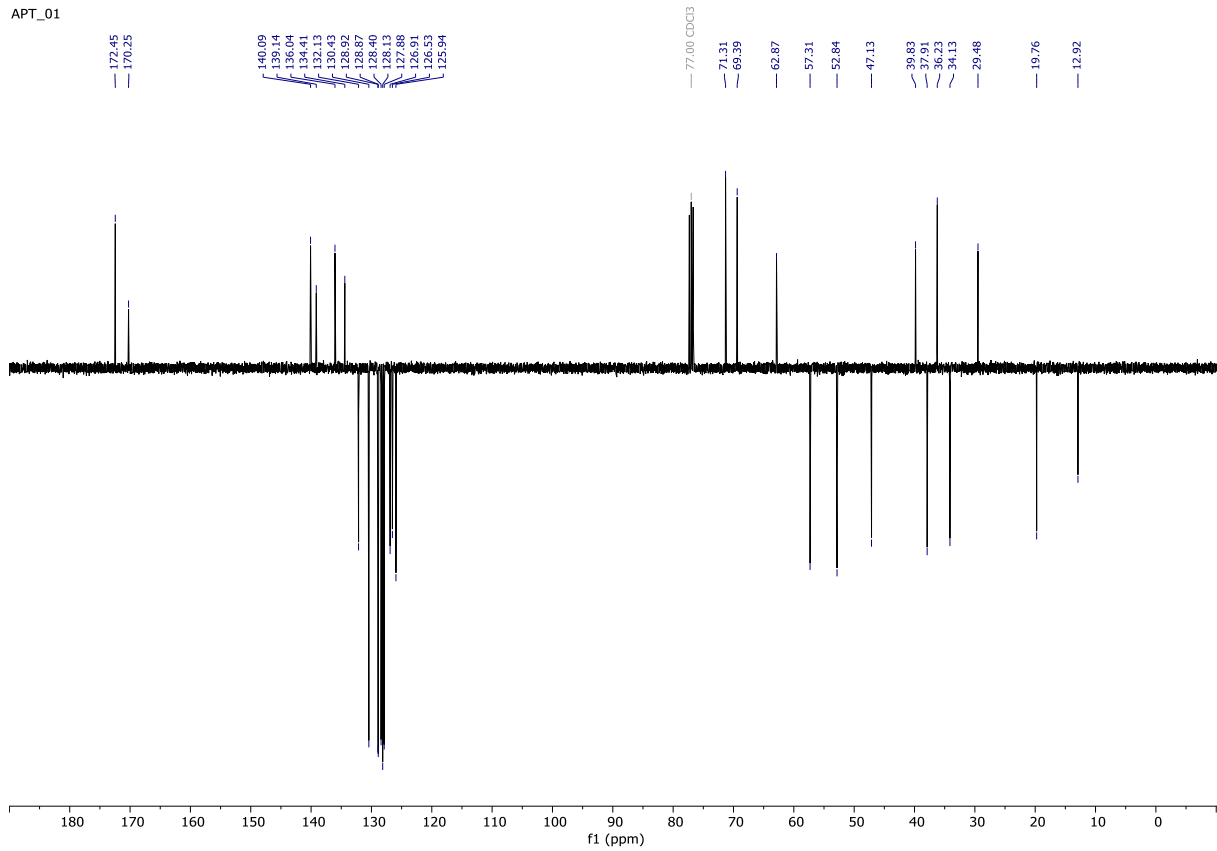



16b

BF-21-174\_ac

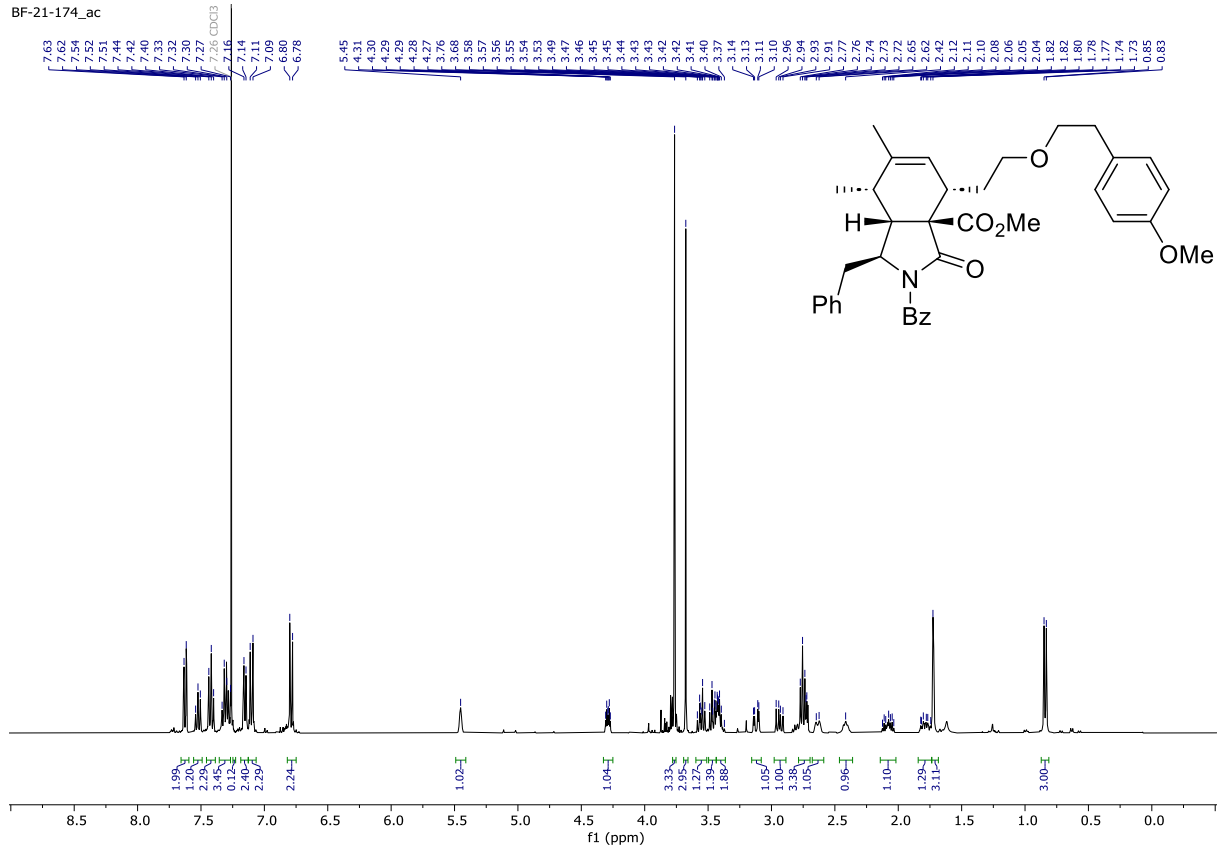

BF174.2.fid

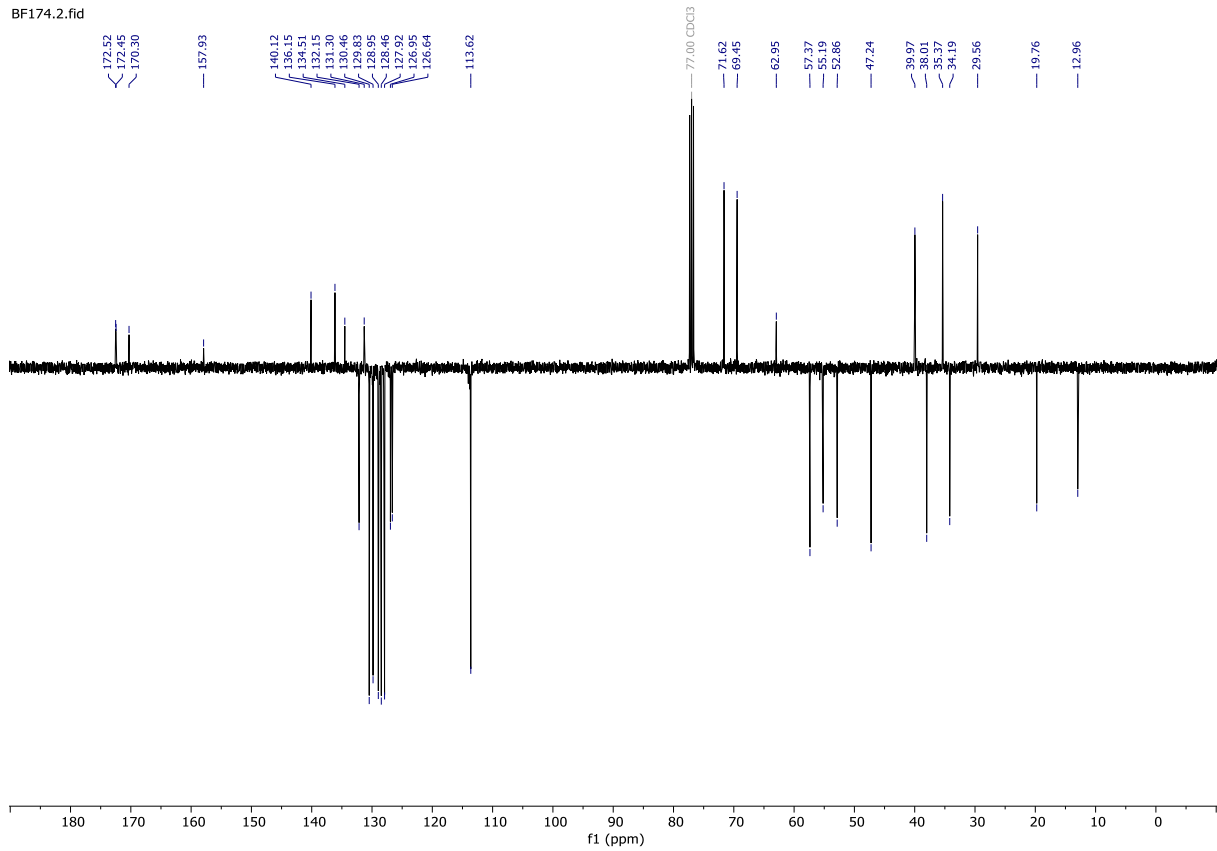

16c

BF159.1.fid

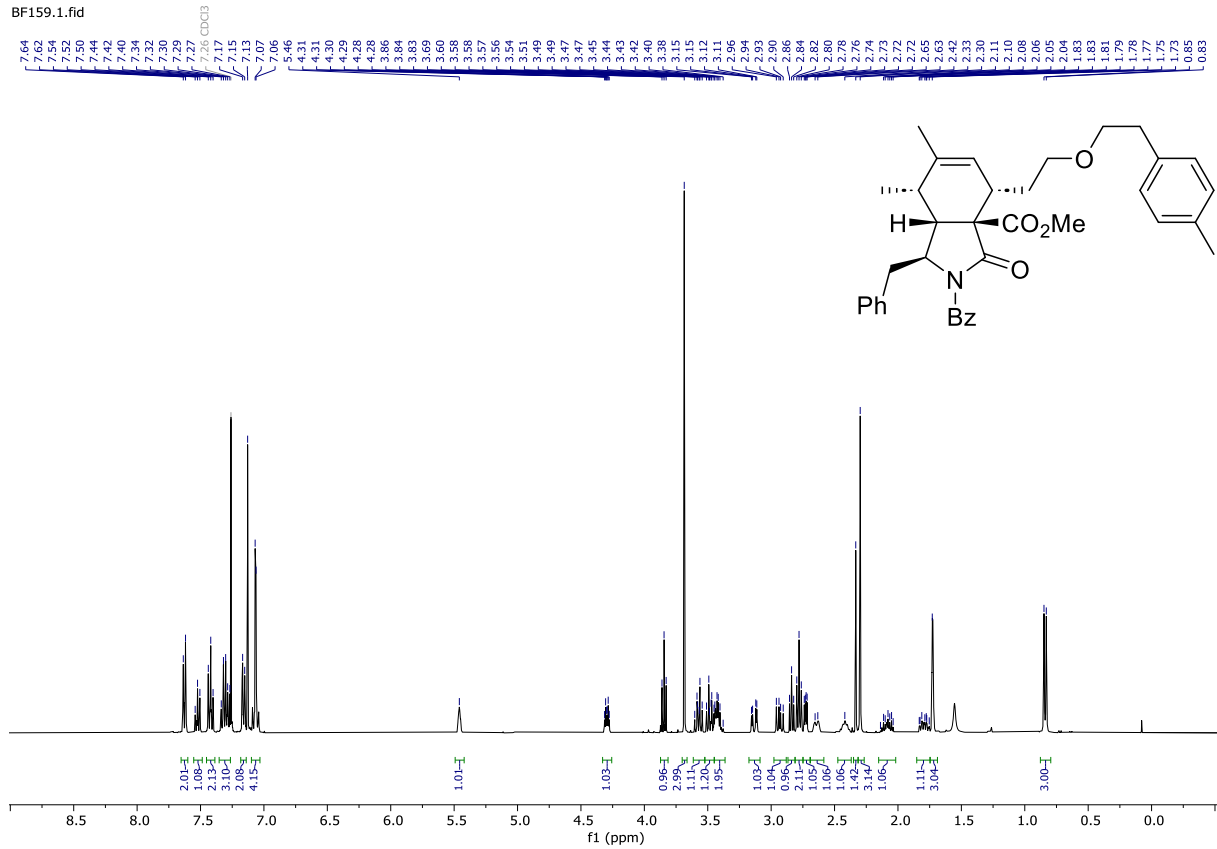

BF159.3.fid

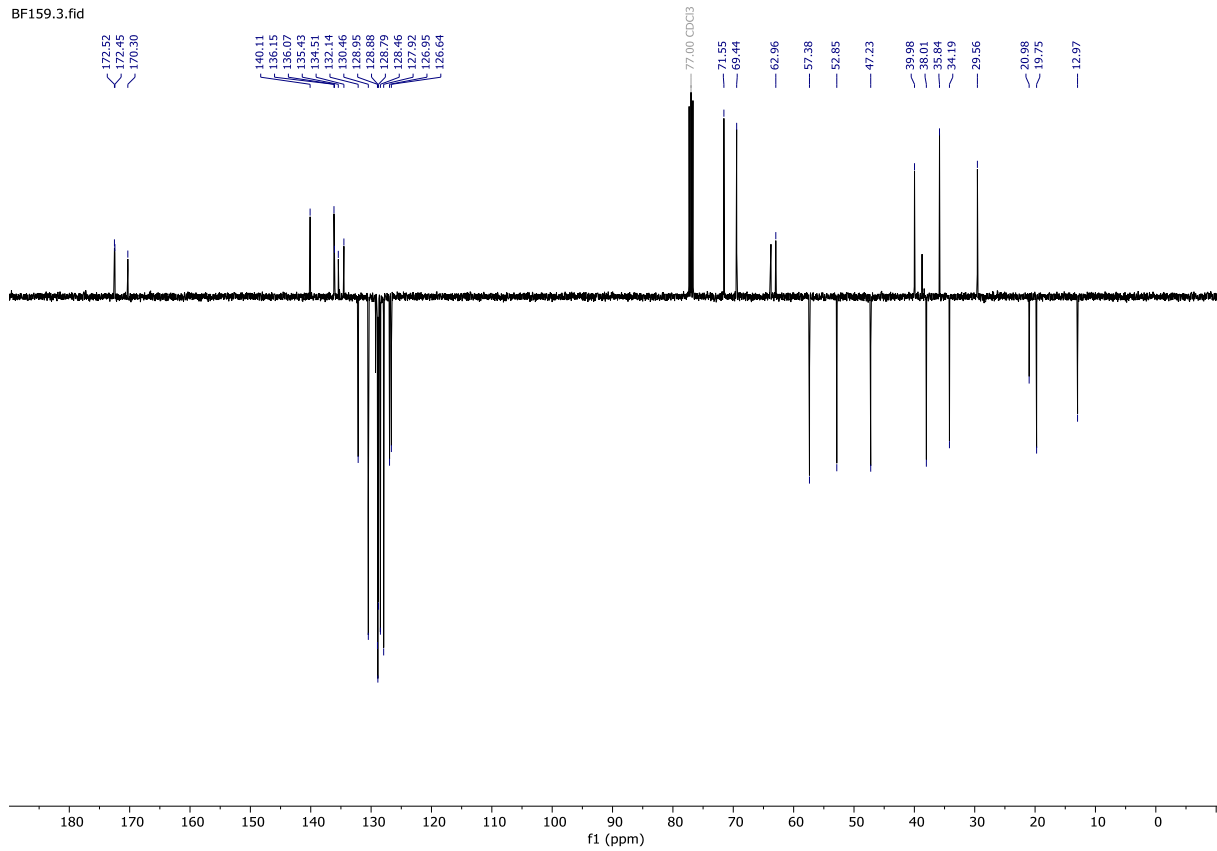

# 16d

BF173.1.fid

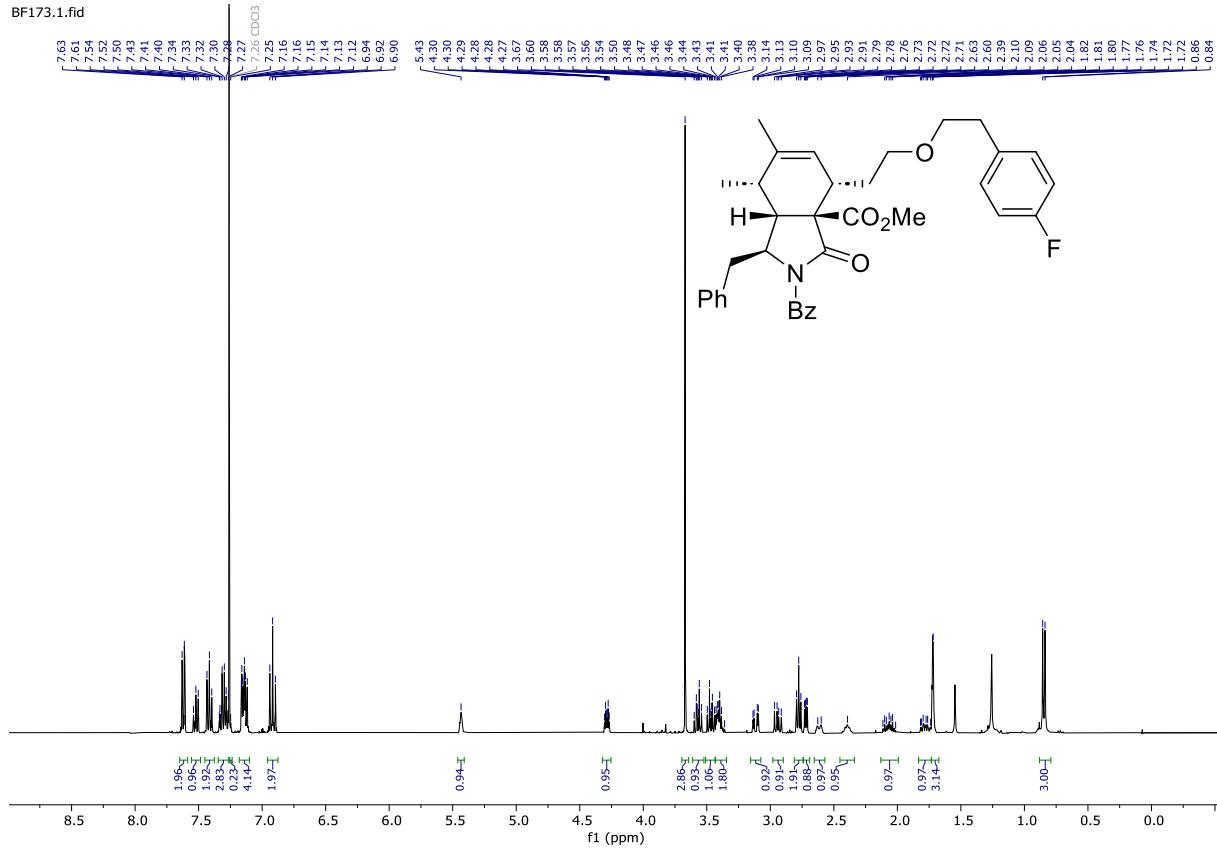

BF173.2.fid

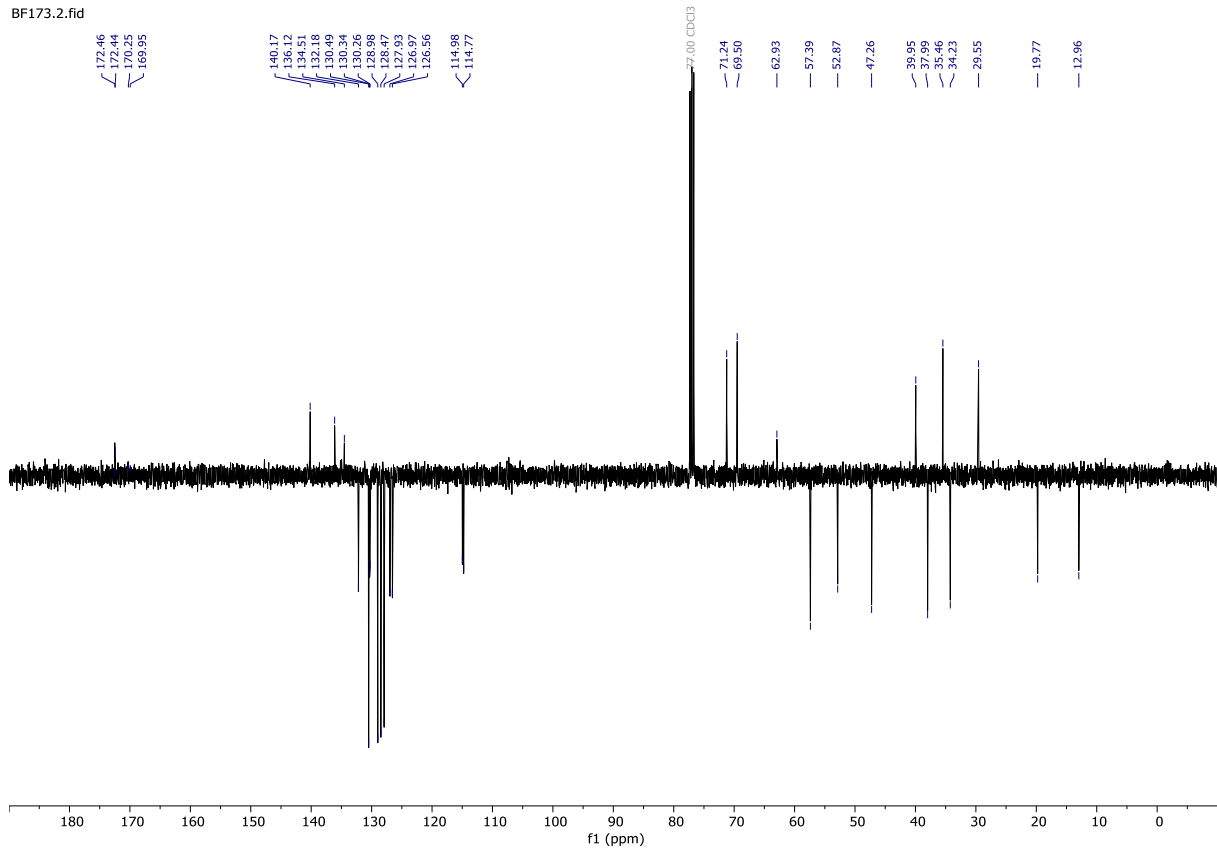

— 144.71

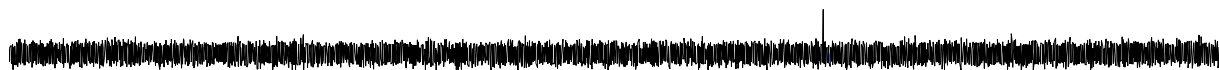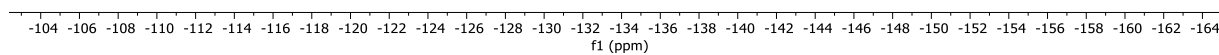



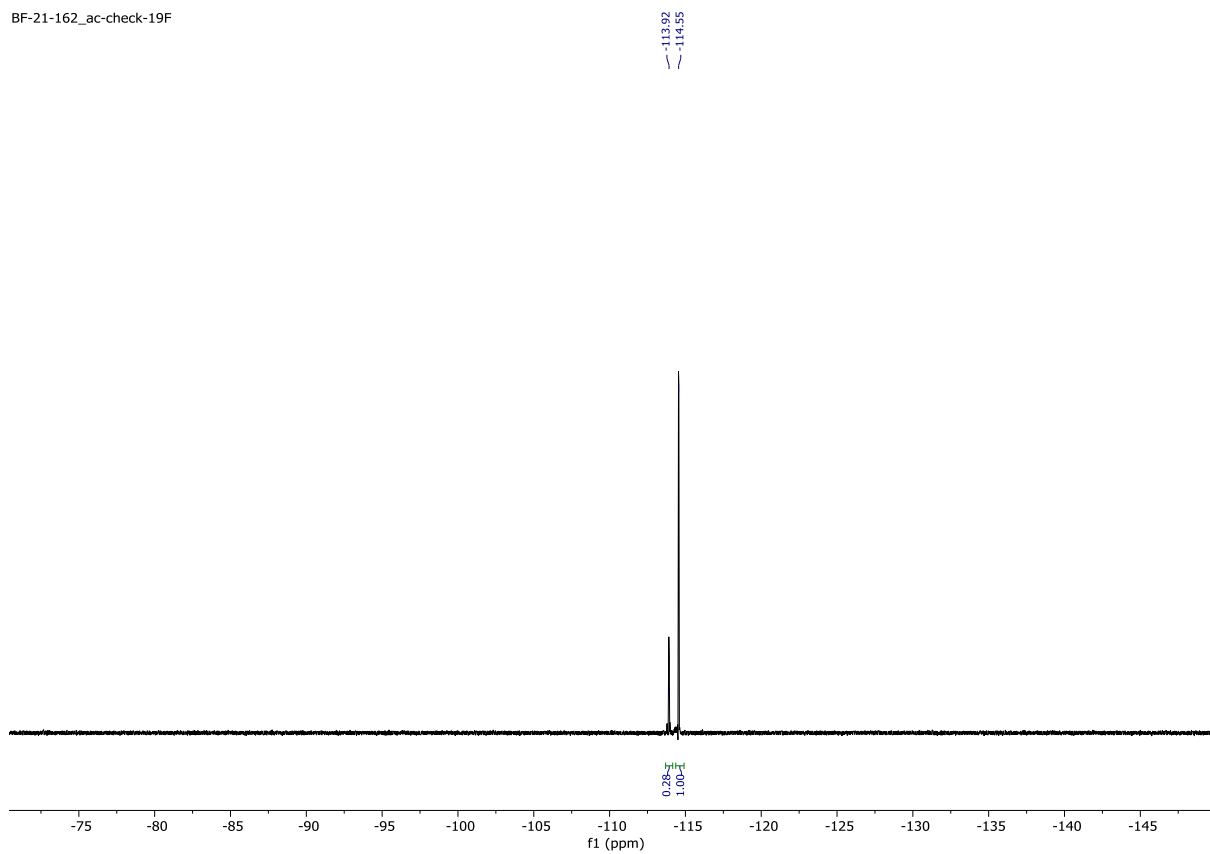

# 16f

BF-21-176\_ac2-h1F

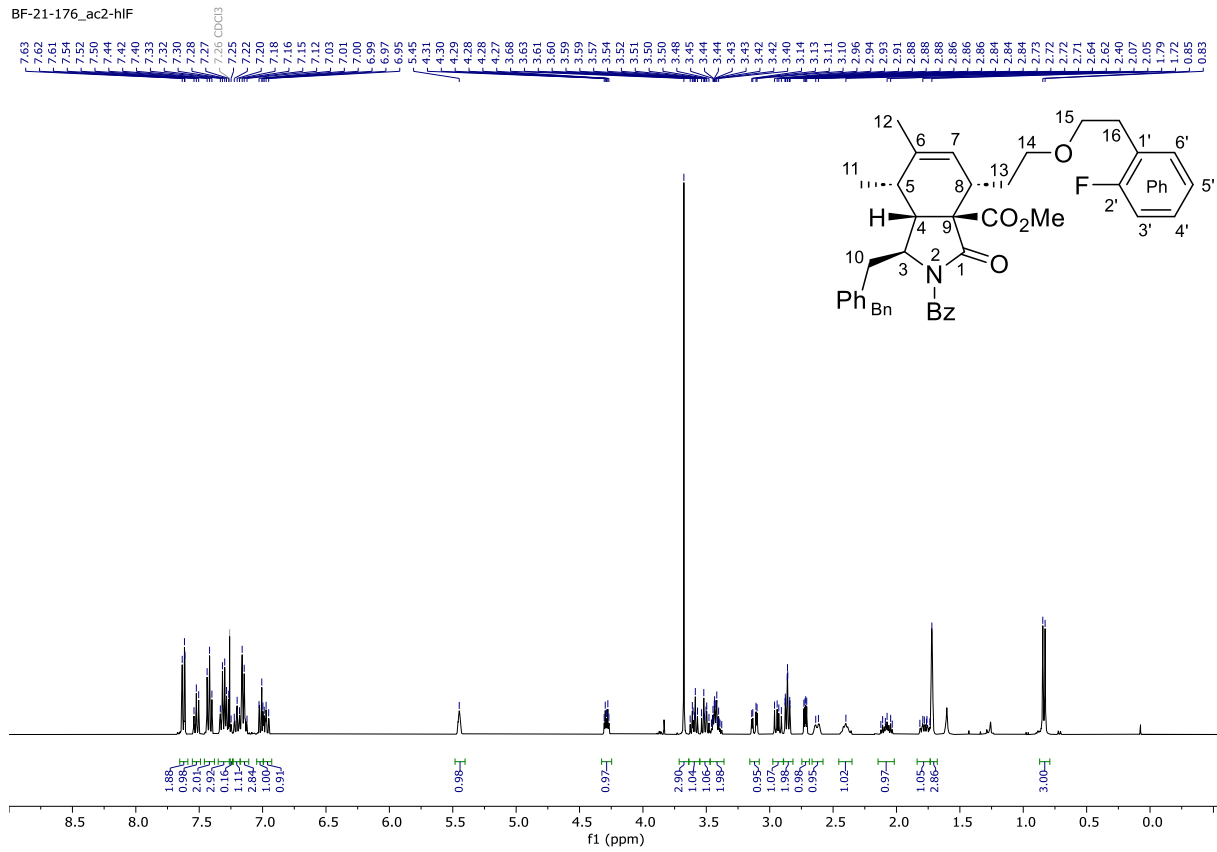

BF176.2.fid

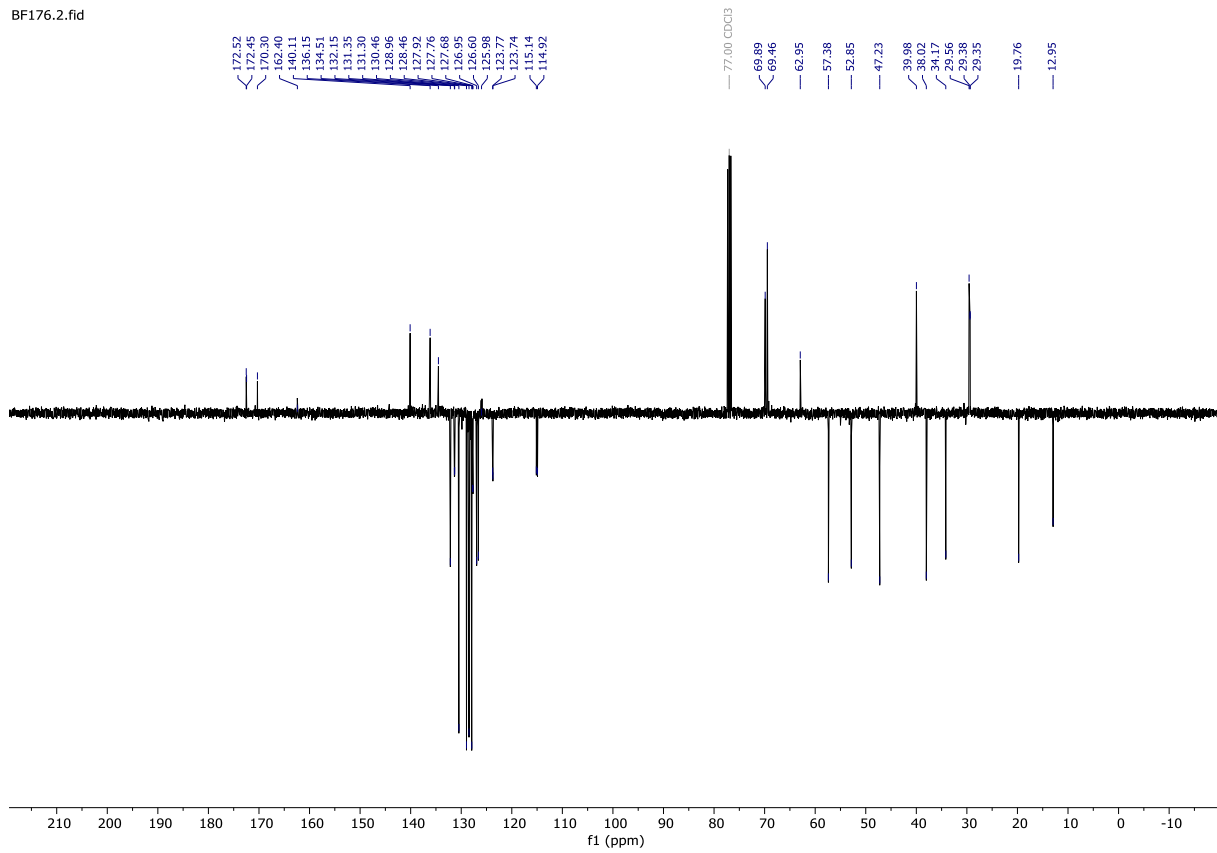

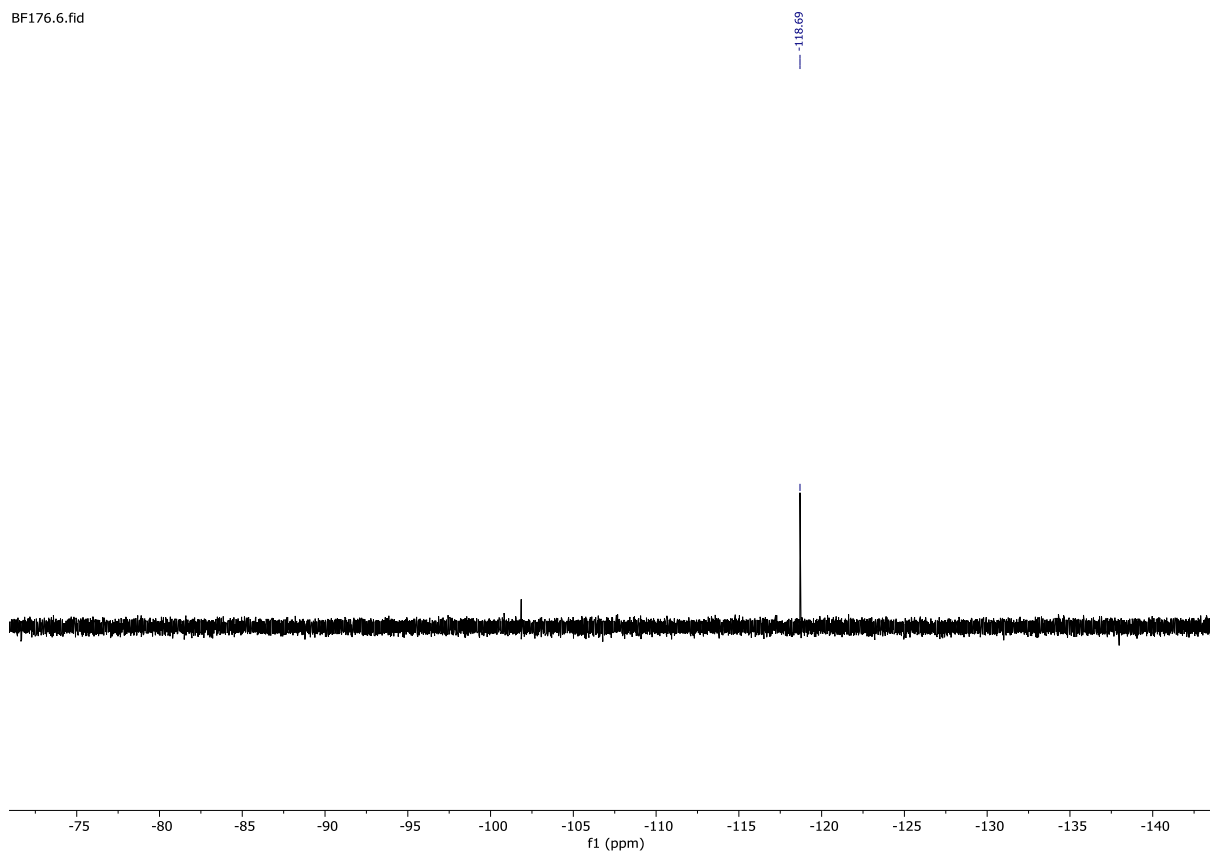



# 16g

BF160.1.fid

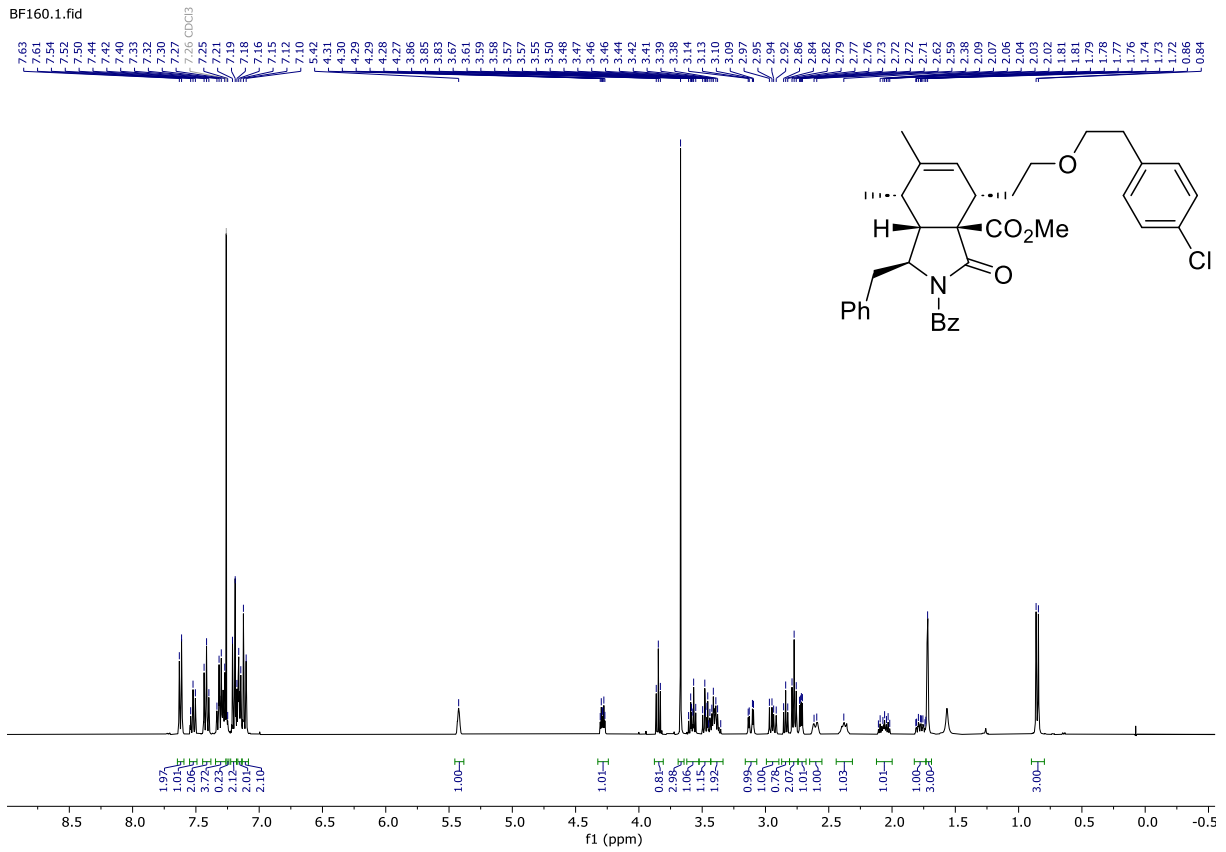

BF160.3.fid

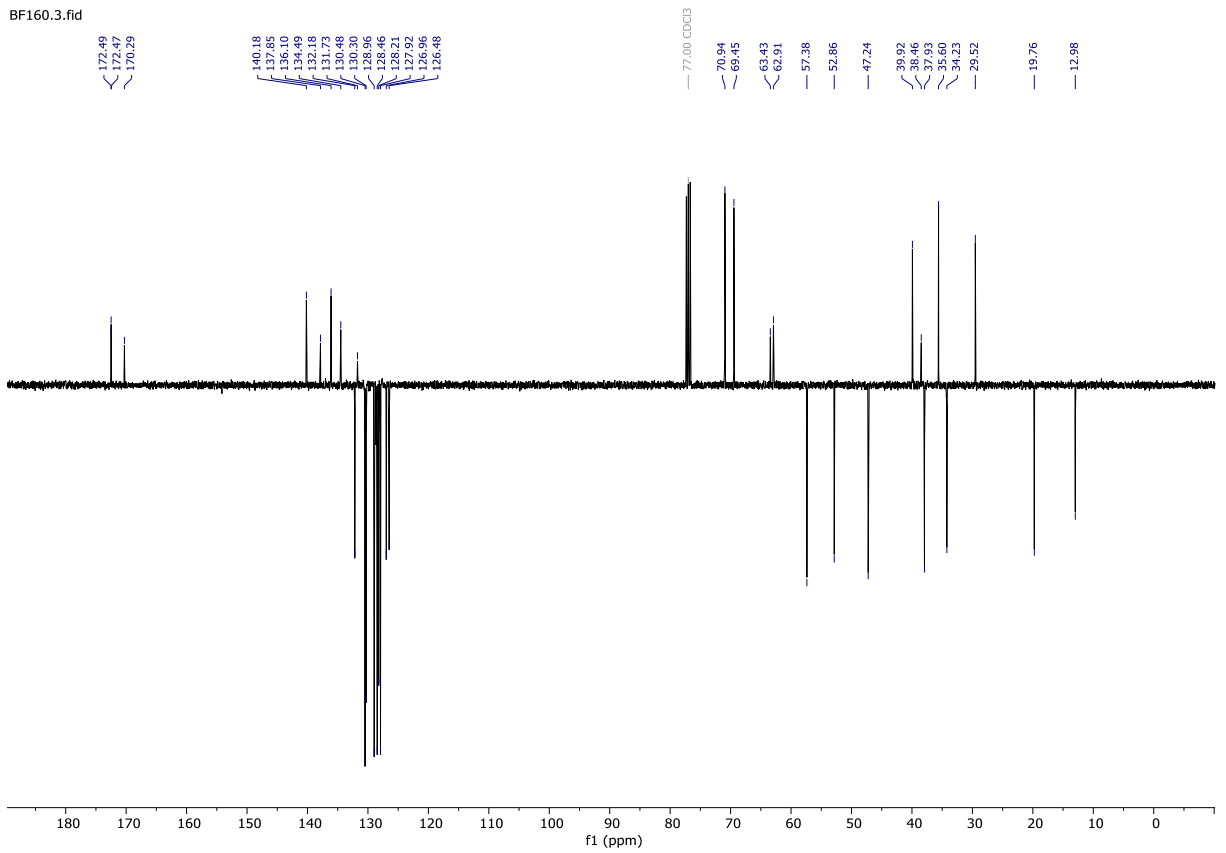

# 16h

BF125.1.fid

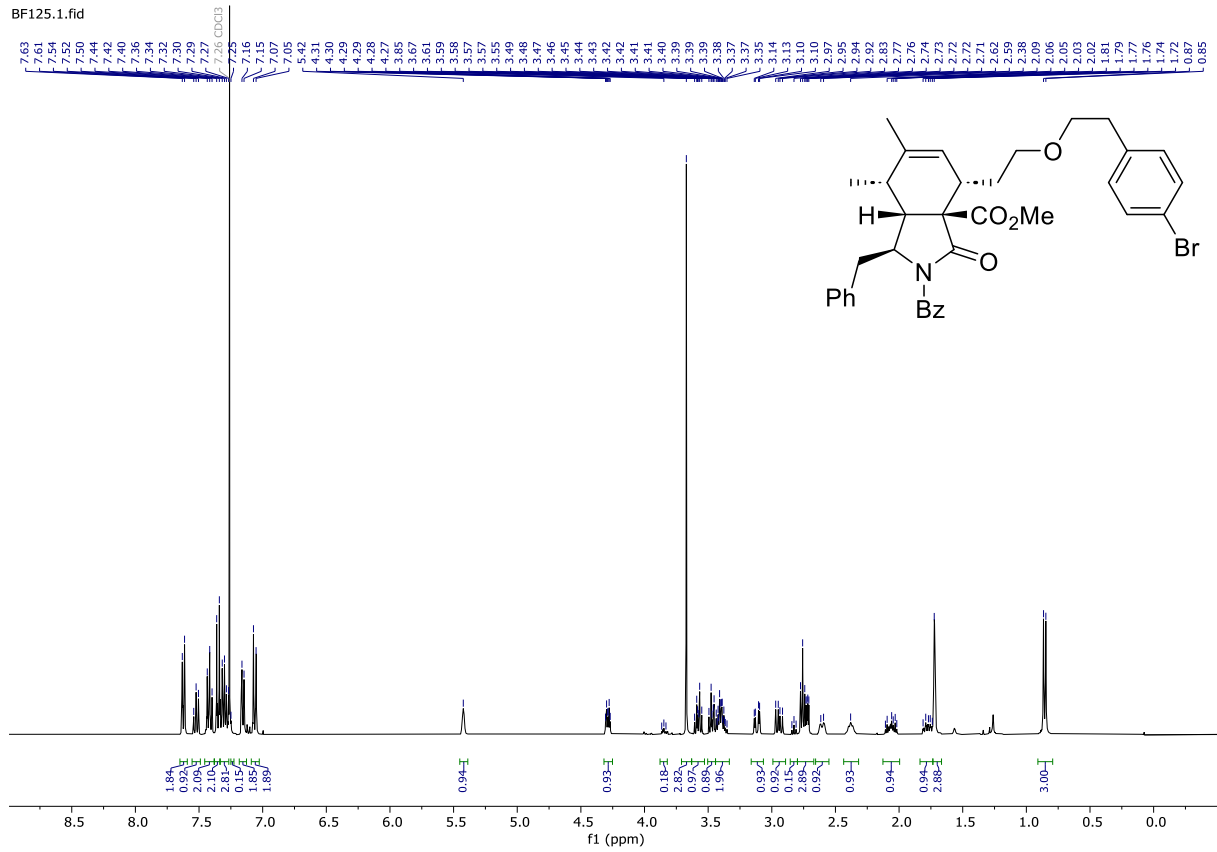

BF125.3.fid

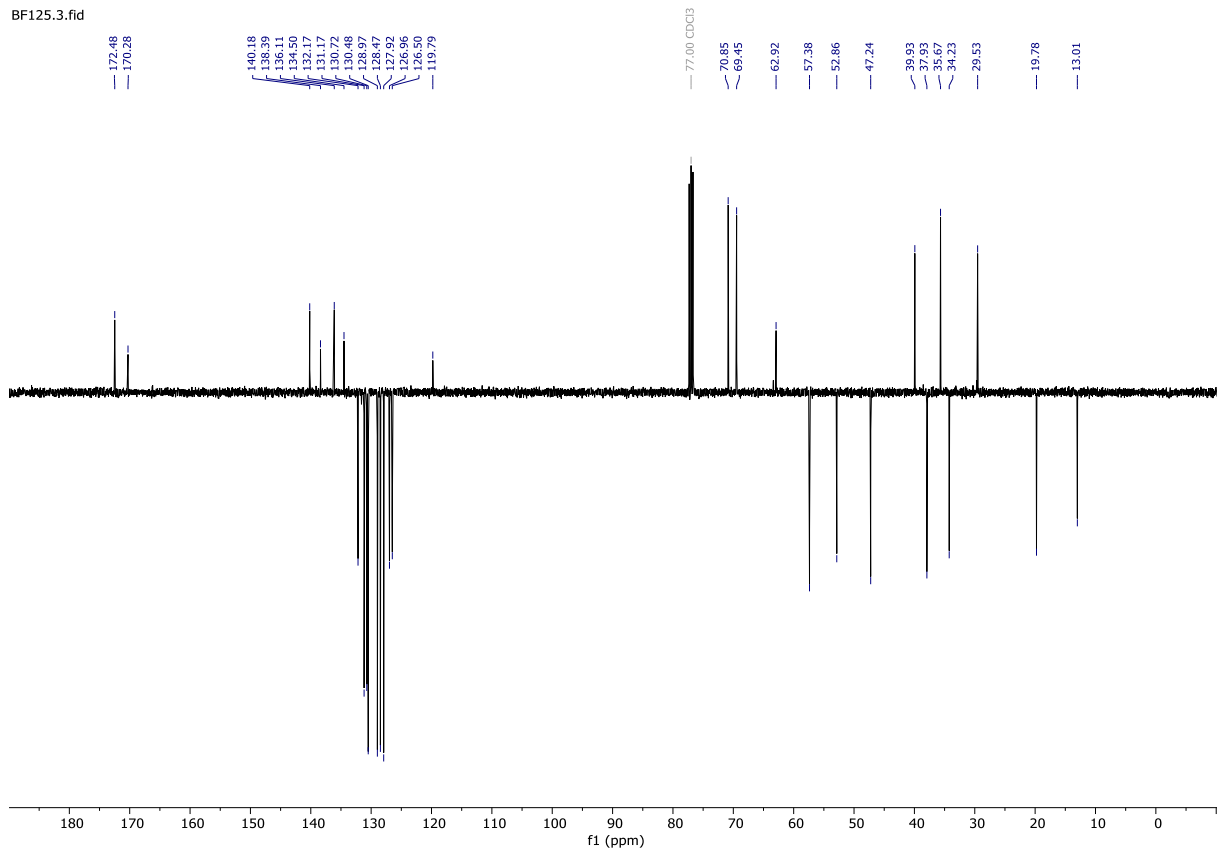

16i

BF126.1.fid

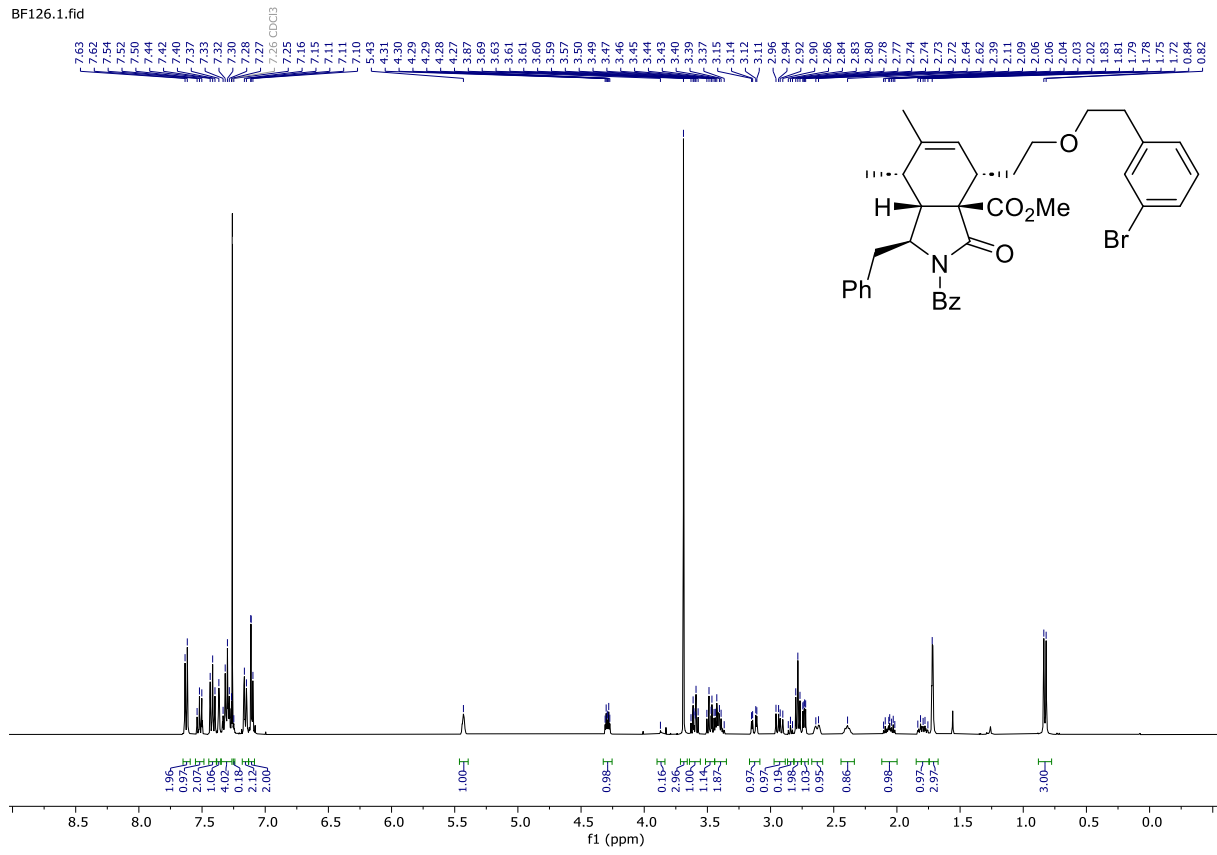

BF126.3.fid

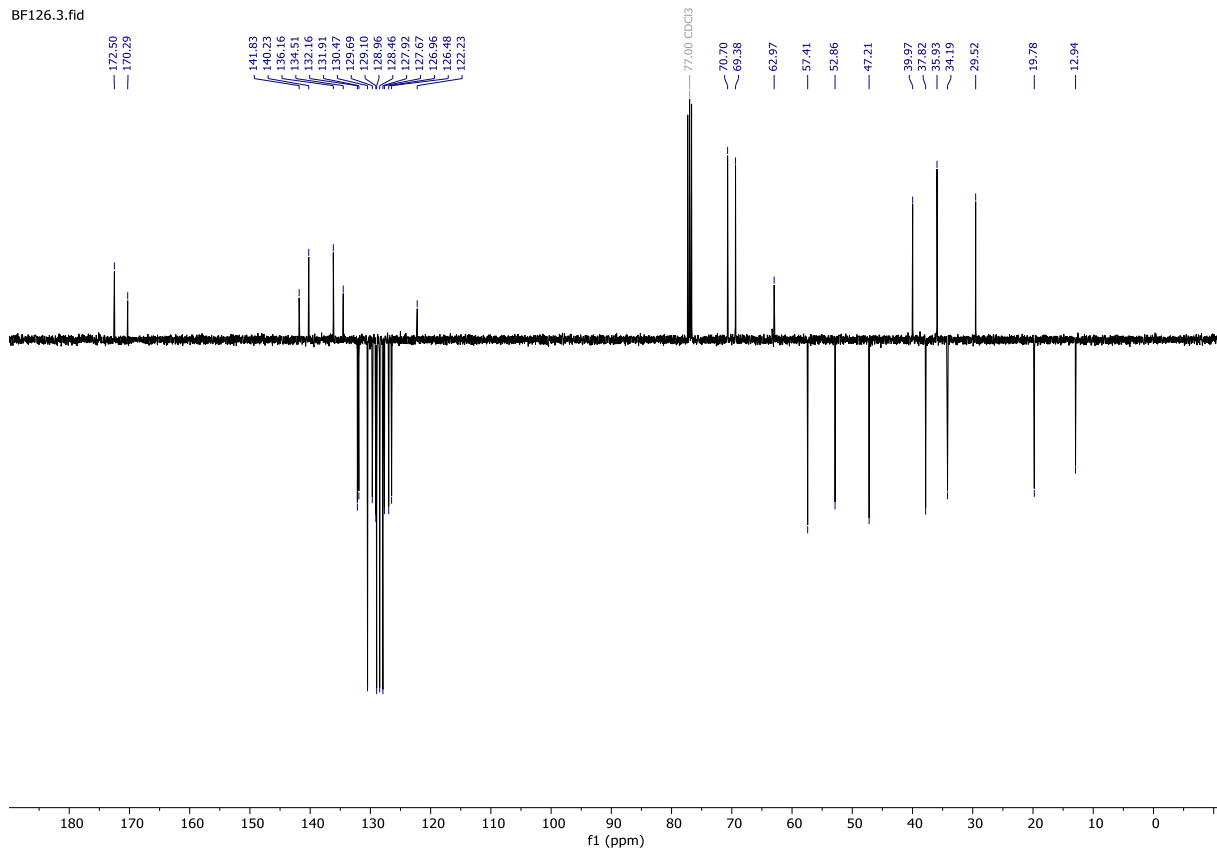



# 17a

BF138.1.fid

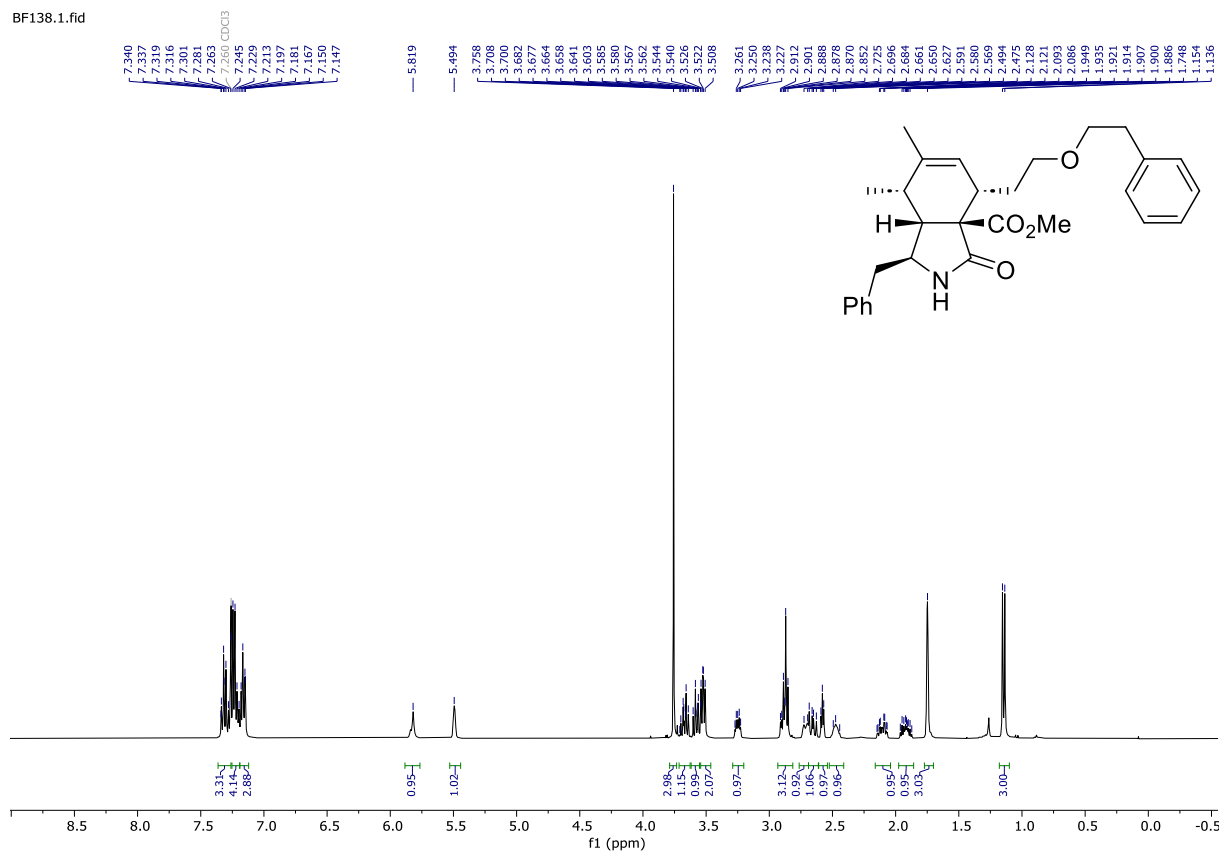

BF138.3.fid

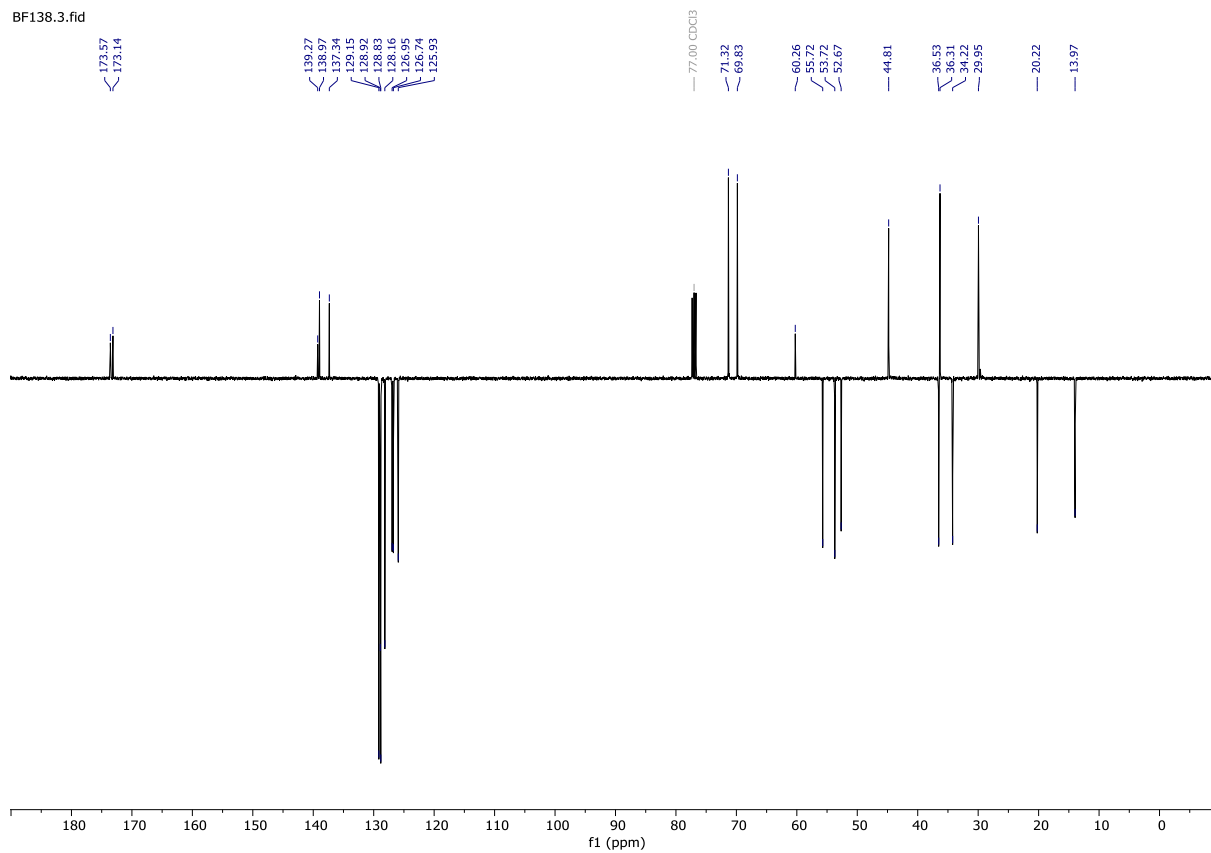

# 17b

BF180.1.fid

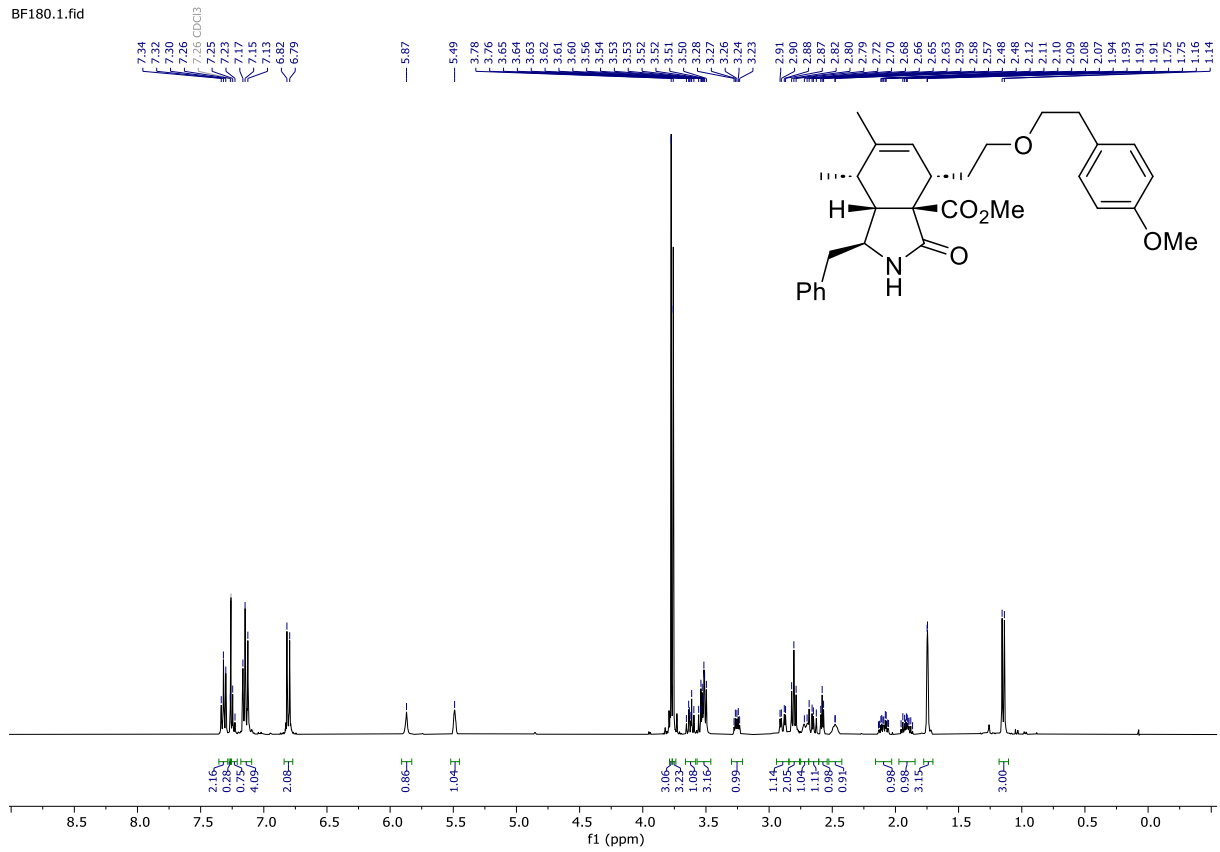

BF180.2.fid

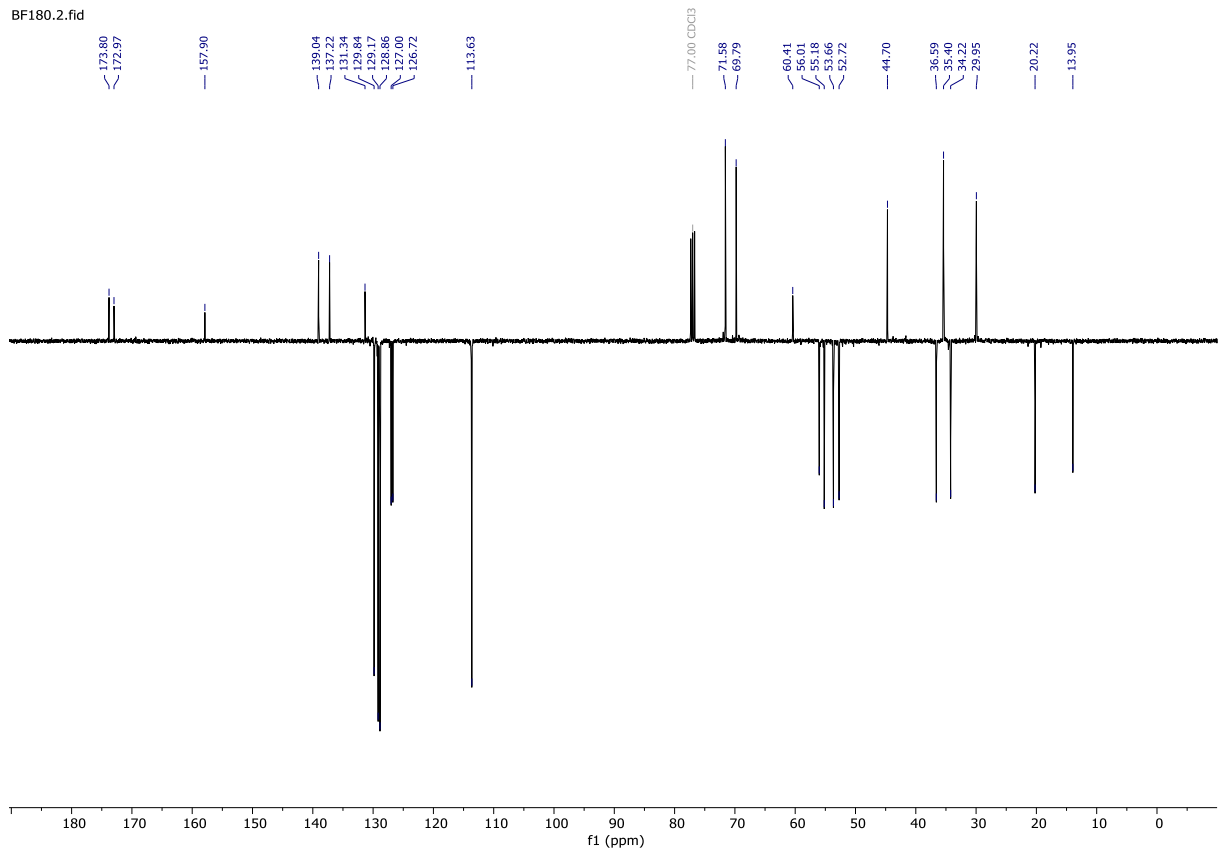

# 17c

BF-164.1.fid

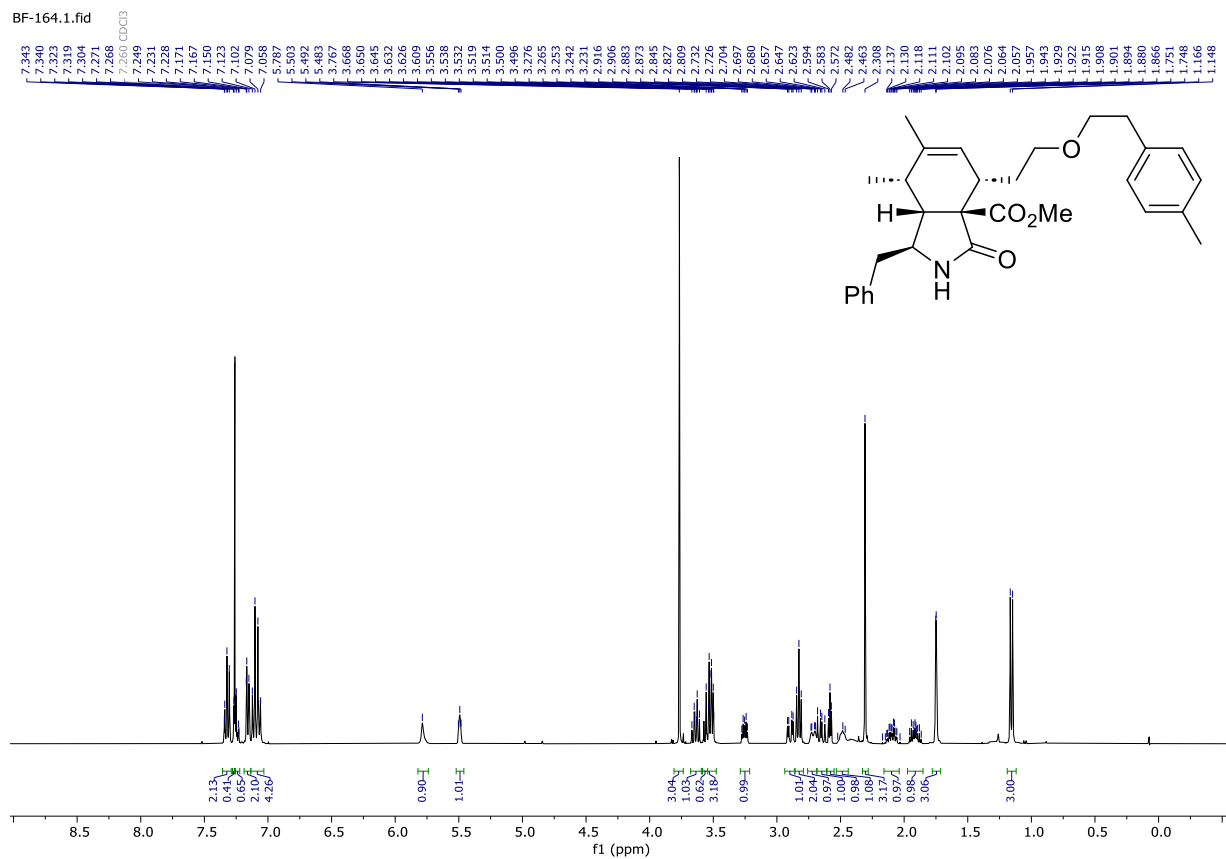

BF-164.3.fid

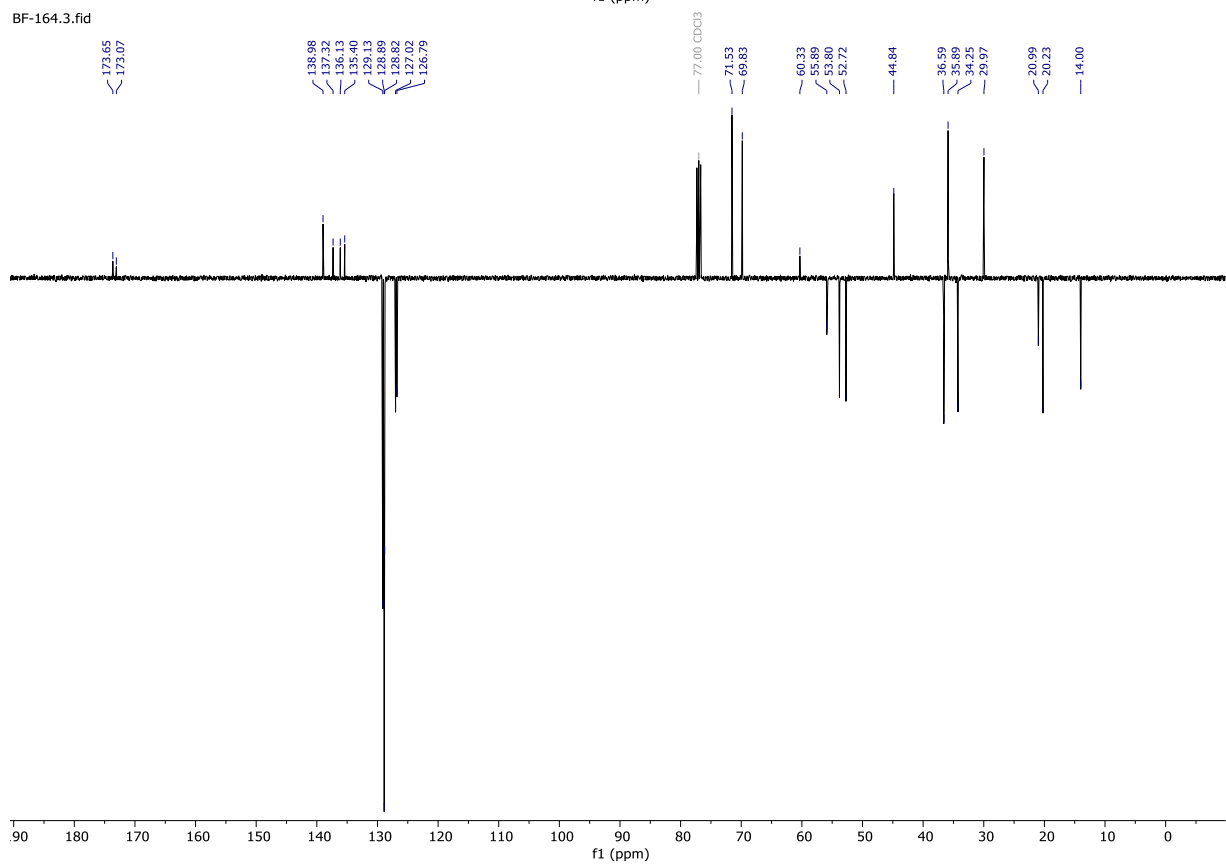

# 17d

BF179.1.fid

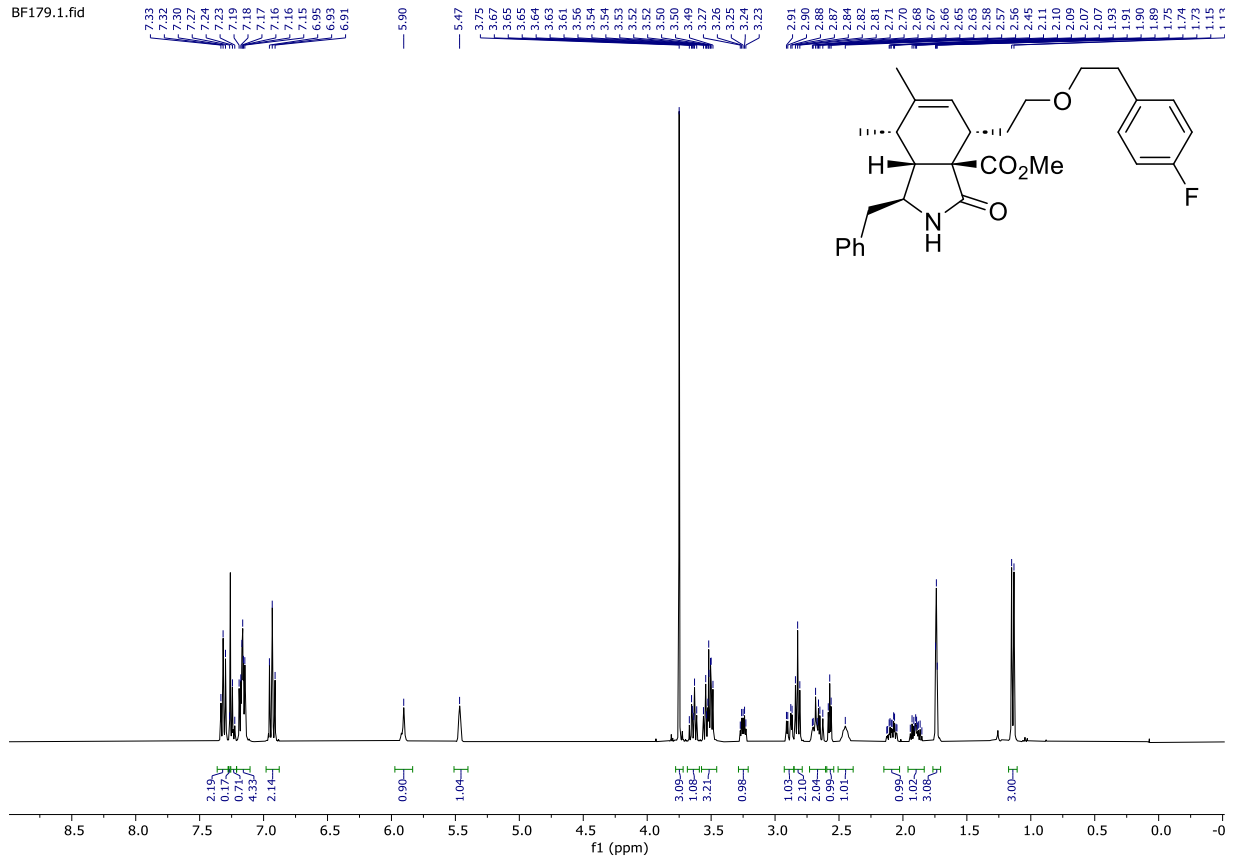

BF179.2.fid

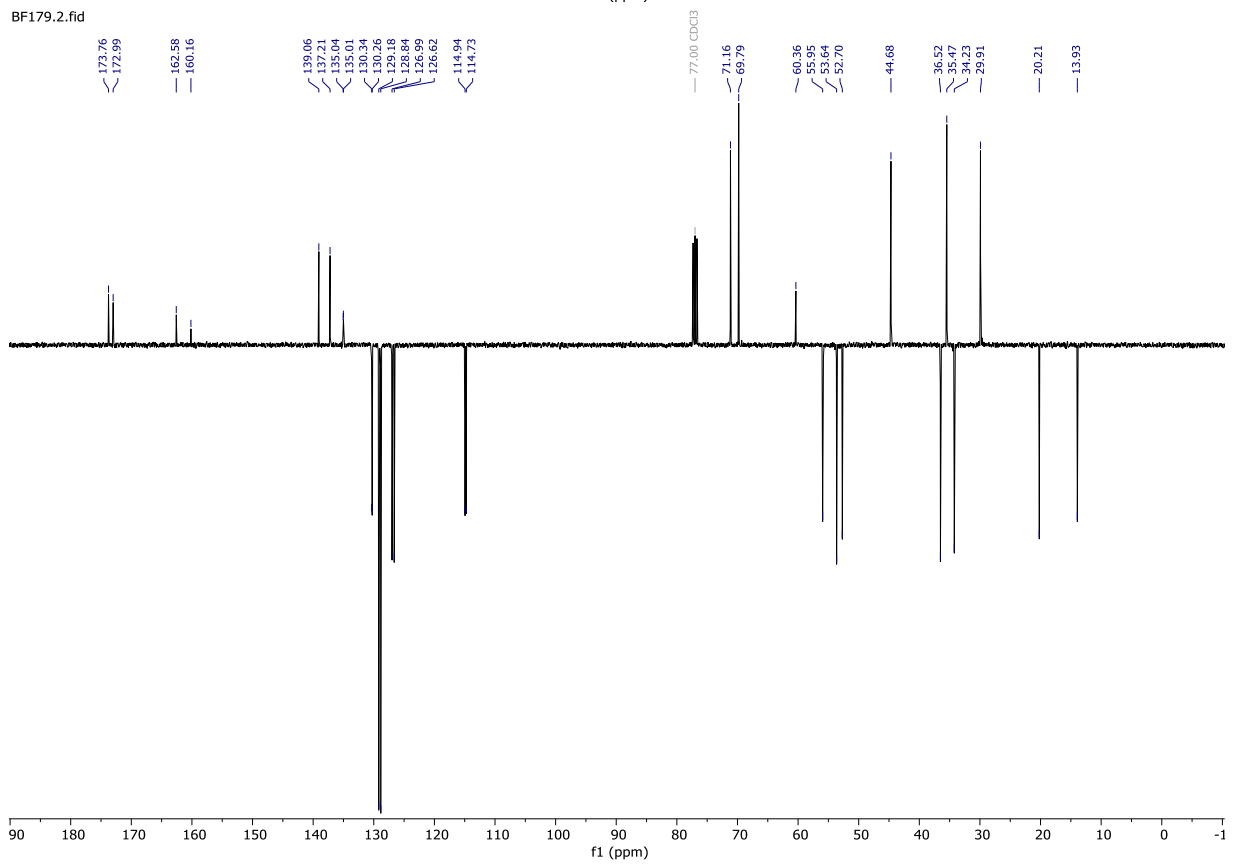



BF179.6.fid

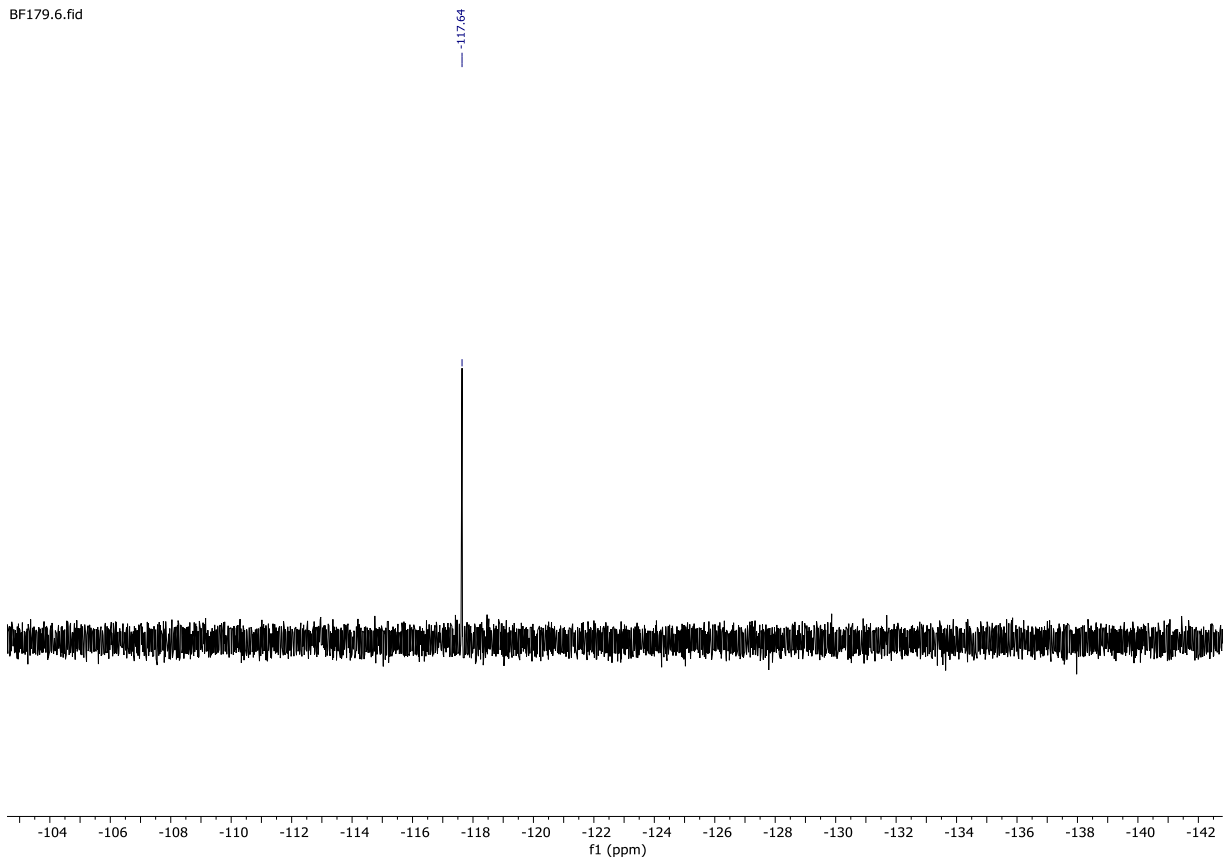

17e

BF-167.1.fid

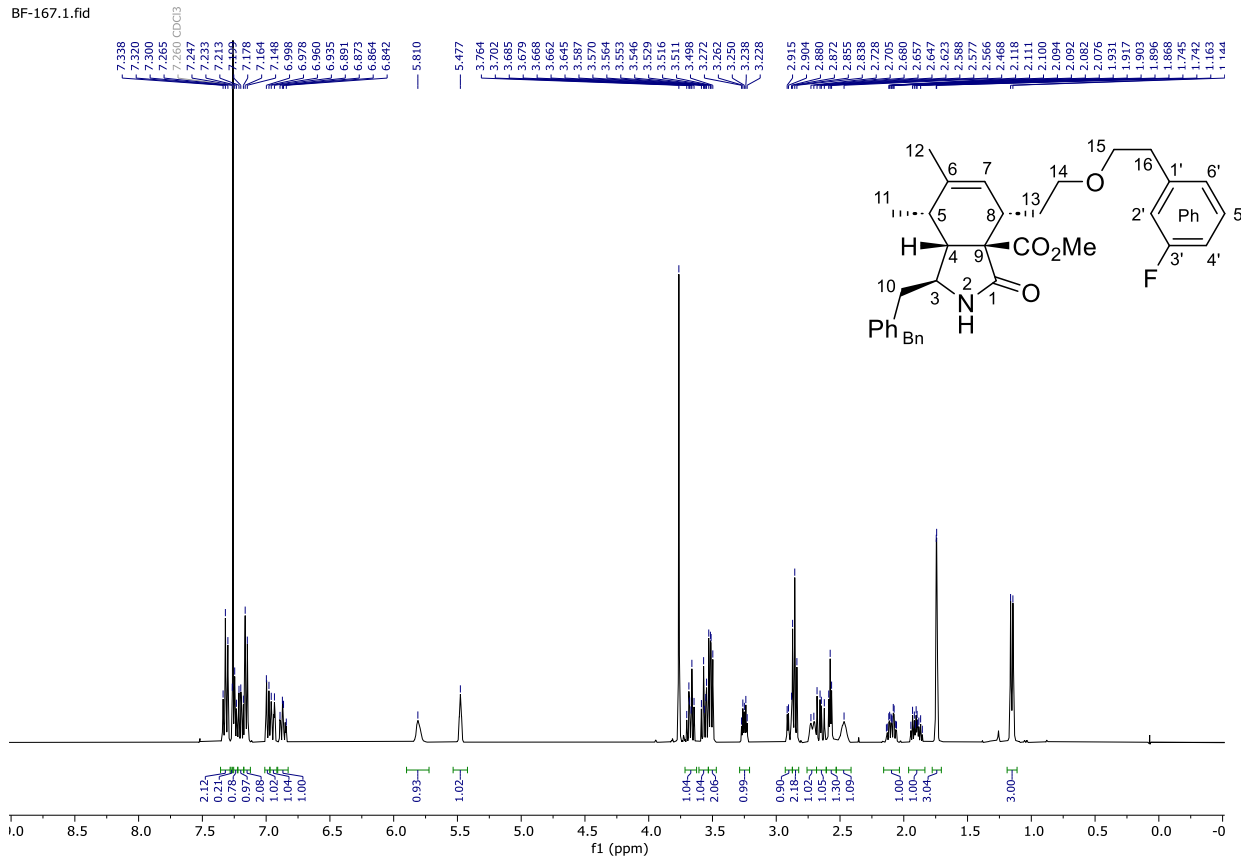

BF-167.4.fid

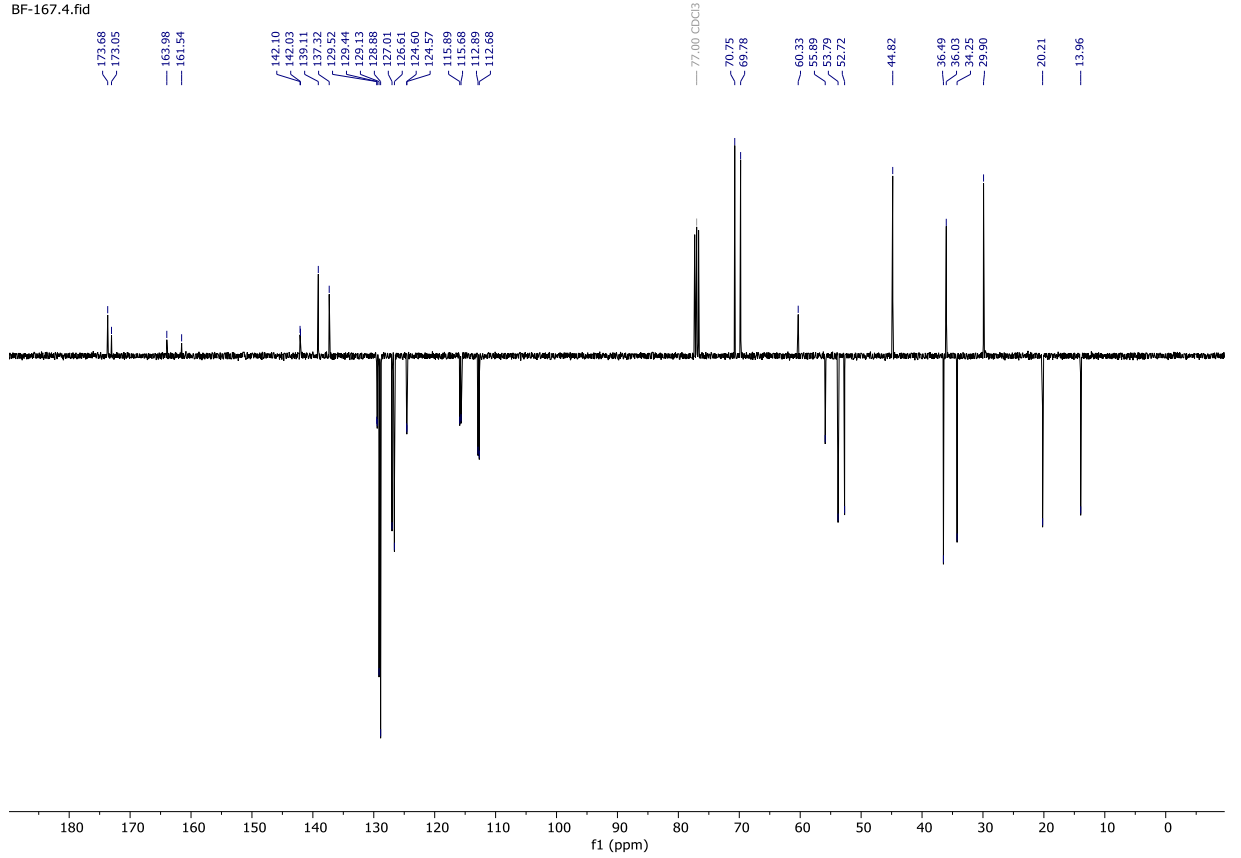

BF-167.3.fid

— 114.07

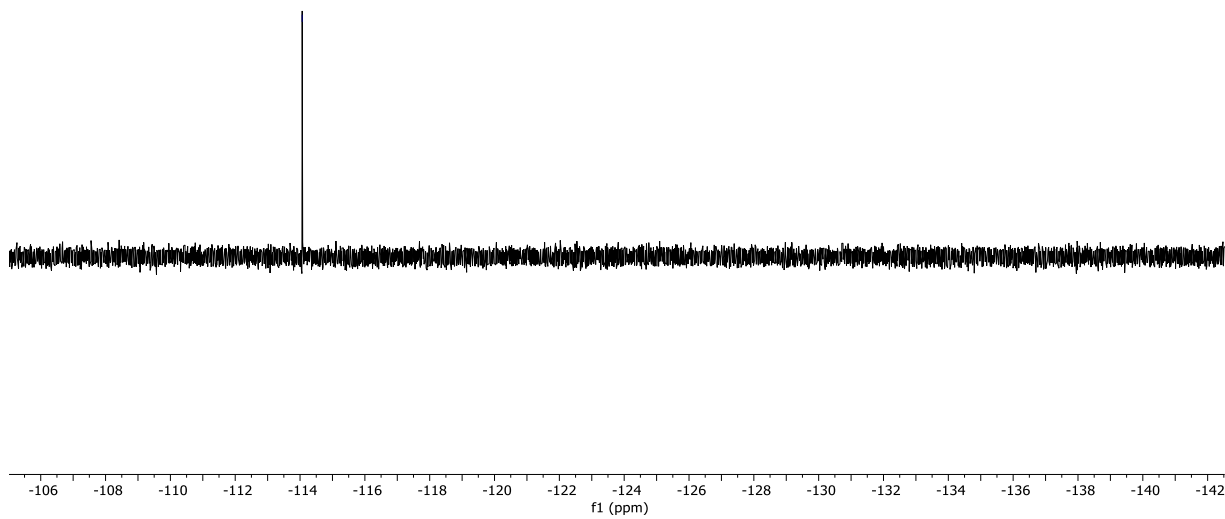

17f

BF181.1.fid

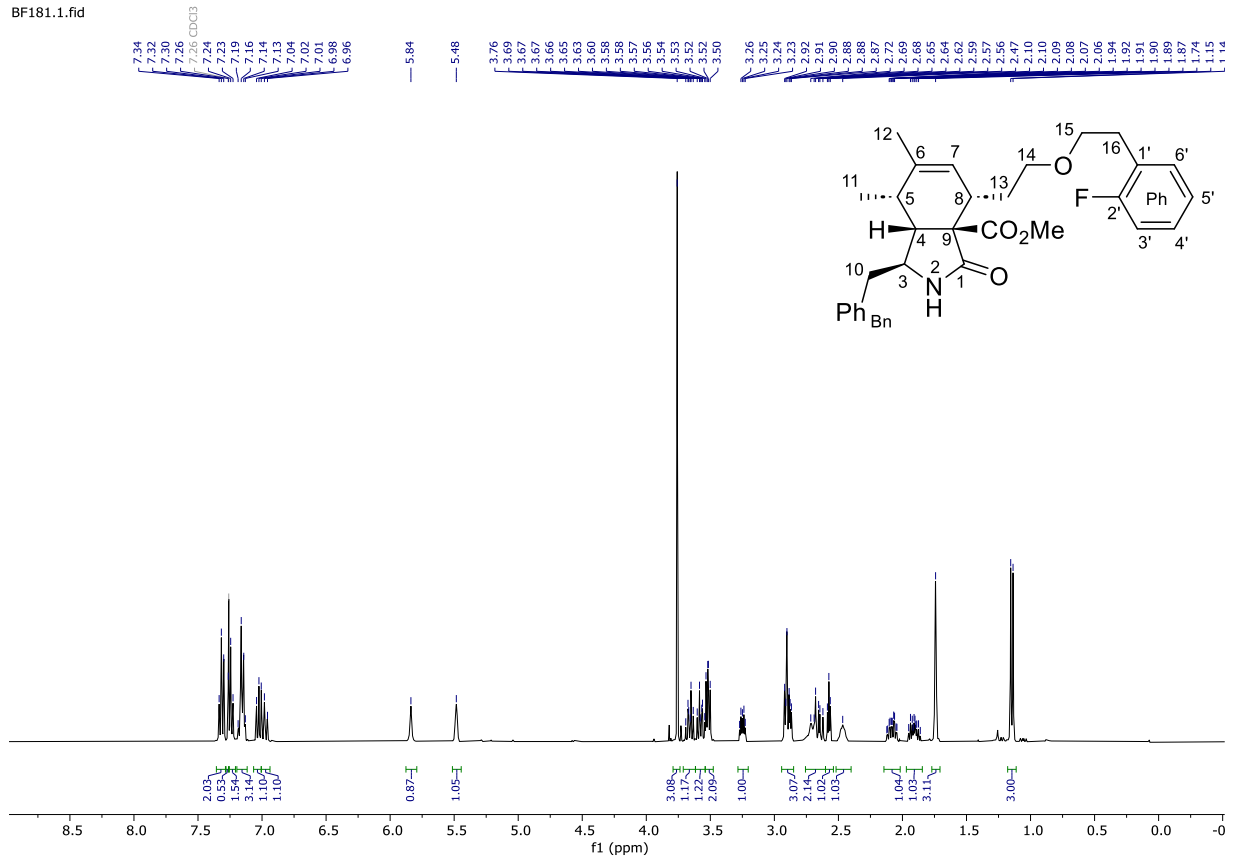

BF181.2.fid

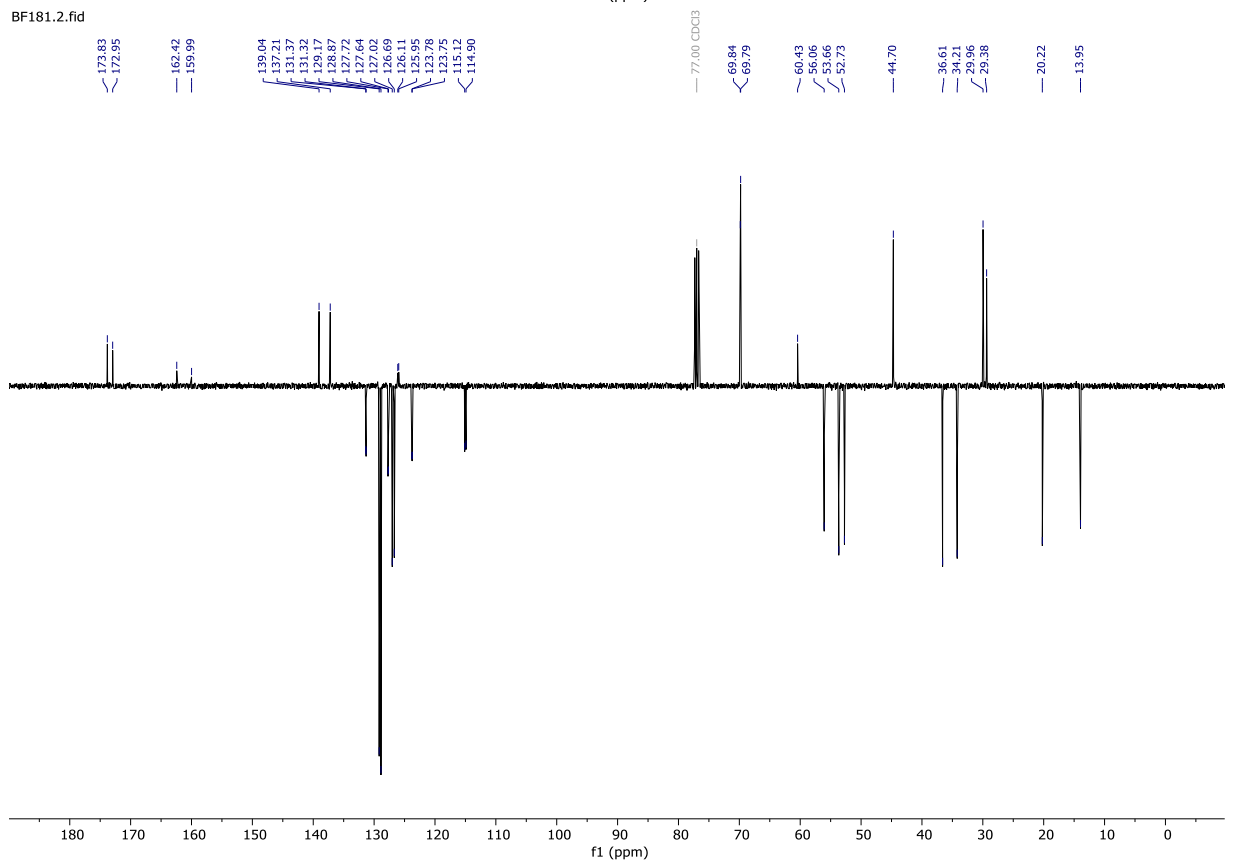

BF181.6.fid

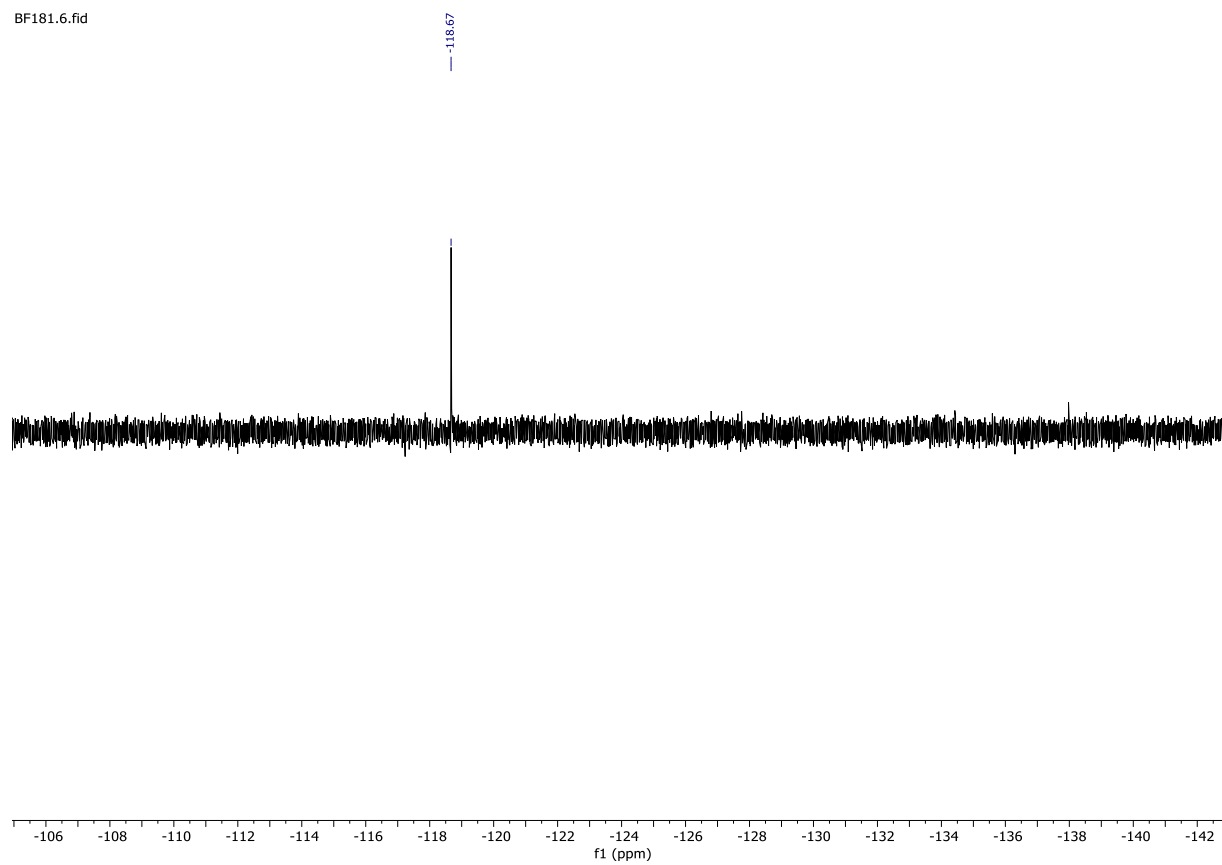

17g

BF-165.1.fid

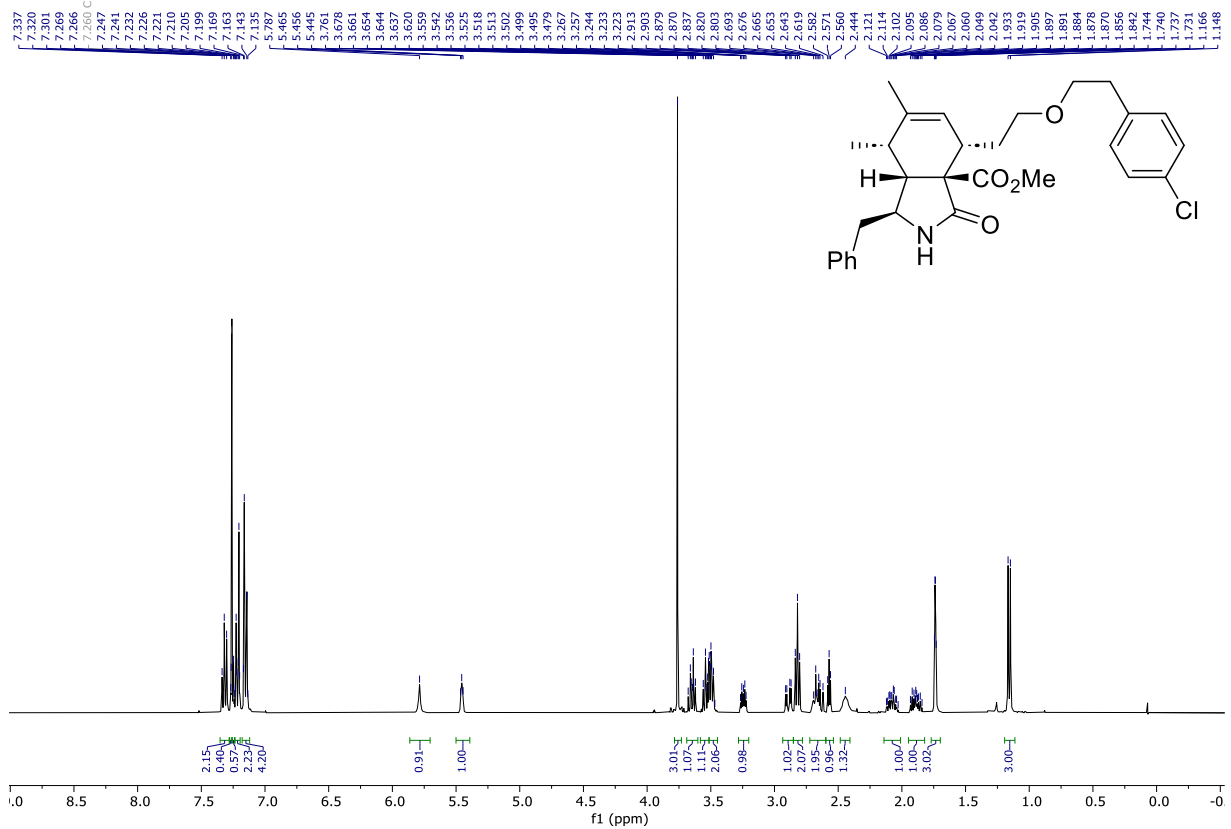

BF-165.3.fid

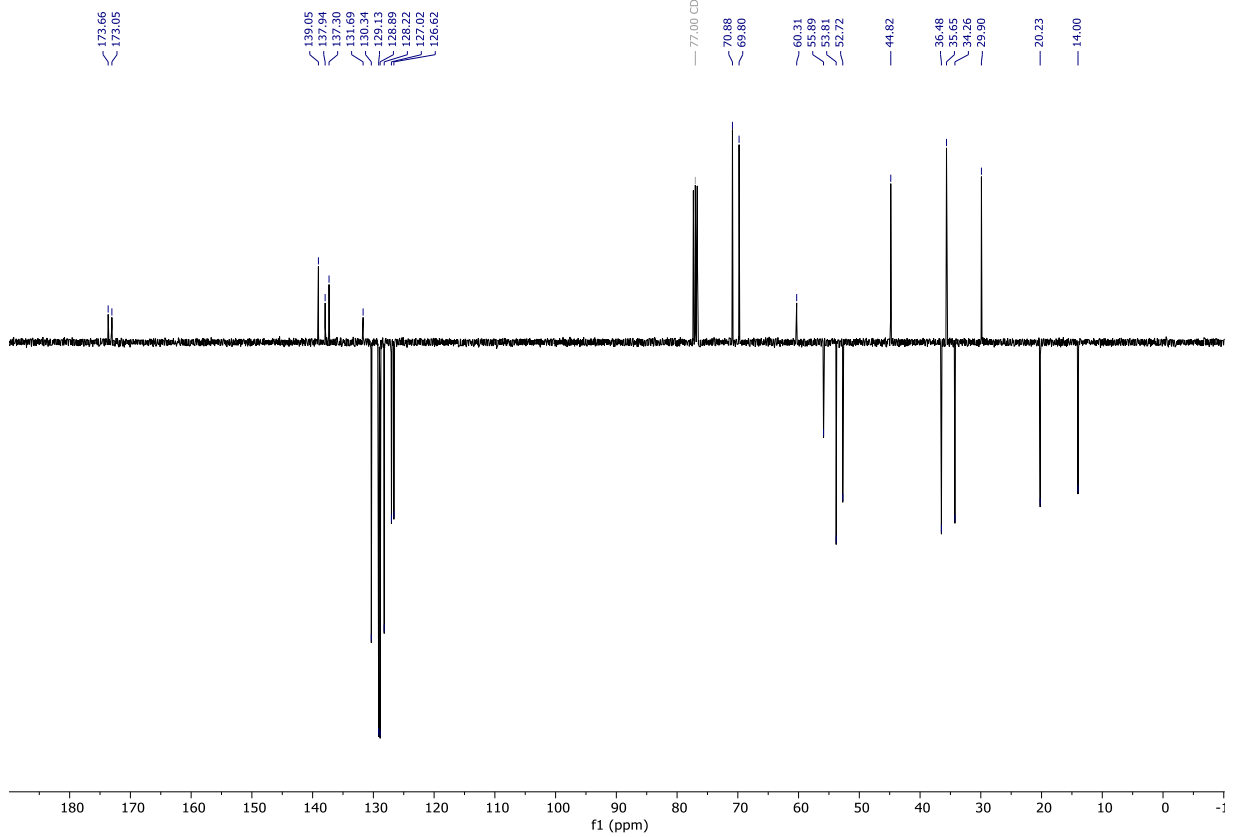

# 17h

BF139.1.fid

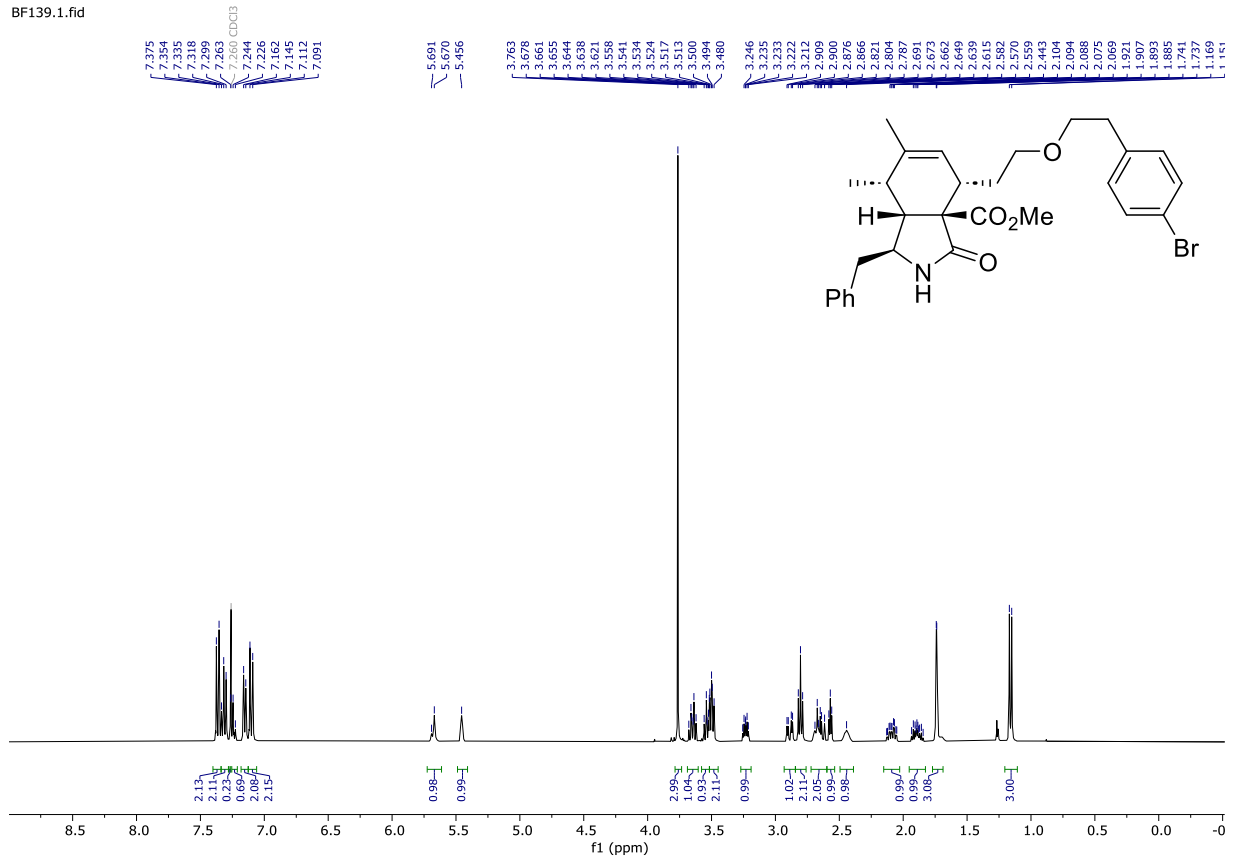

BF139.3.fid

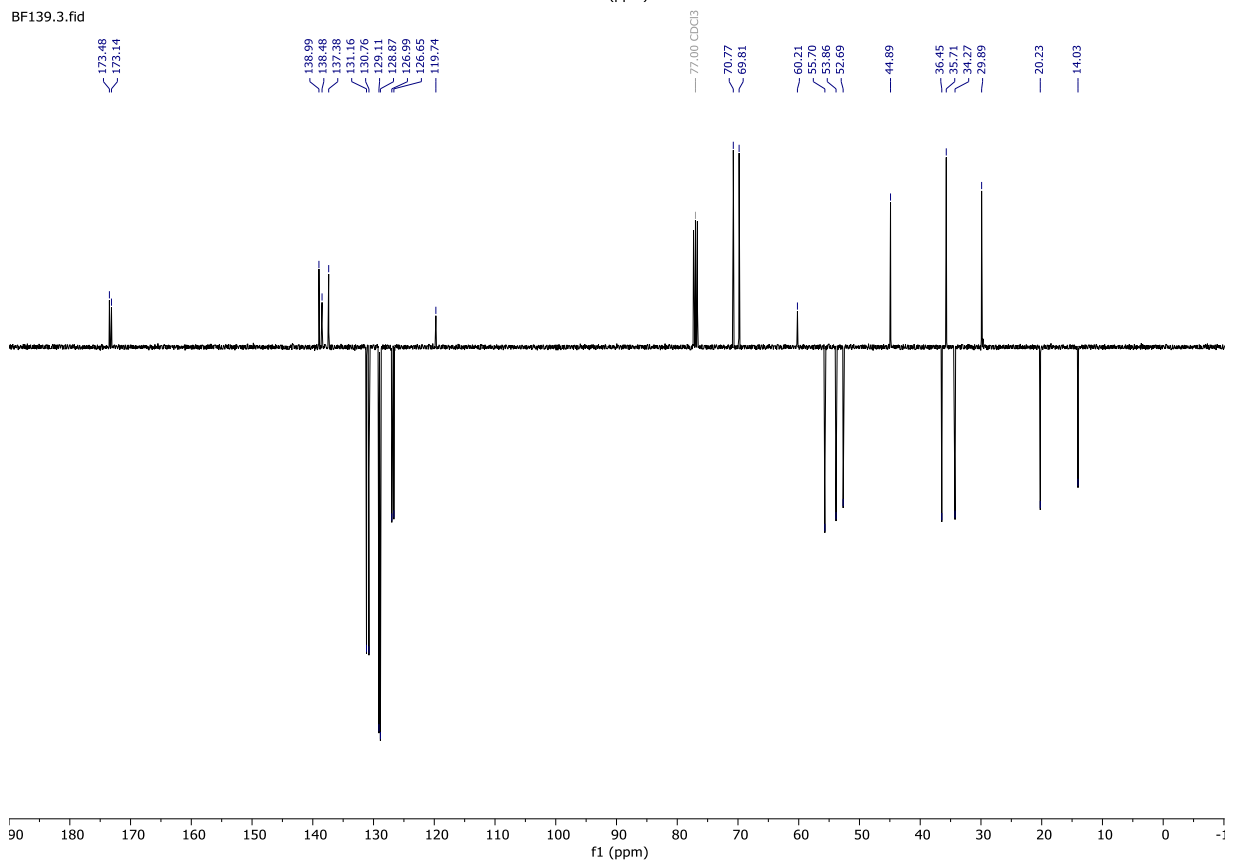

17i

BF140.1.fid

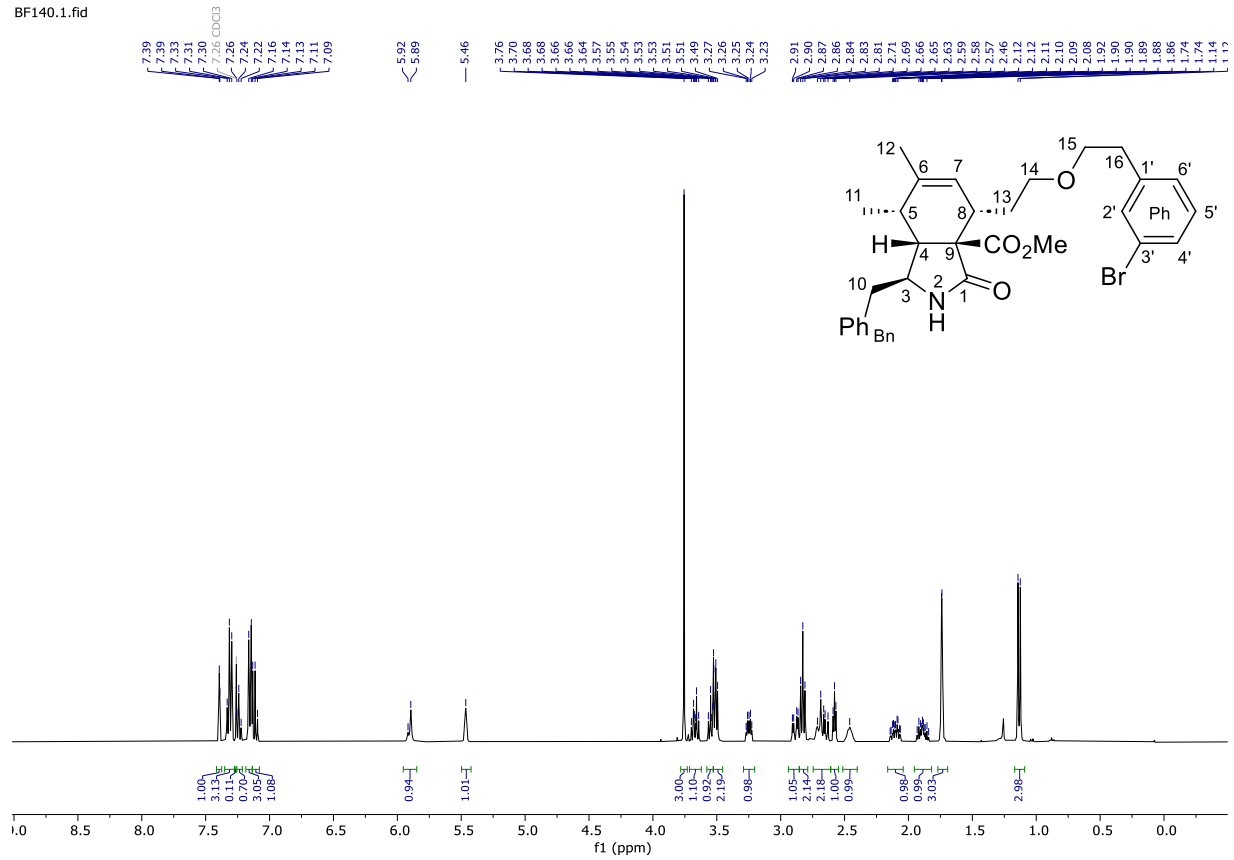

BF140.3.fid

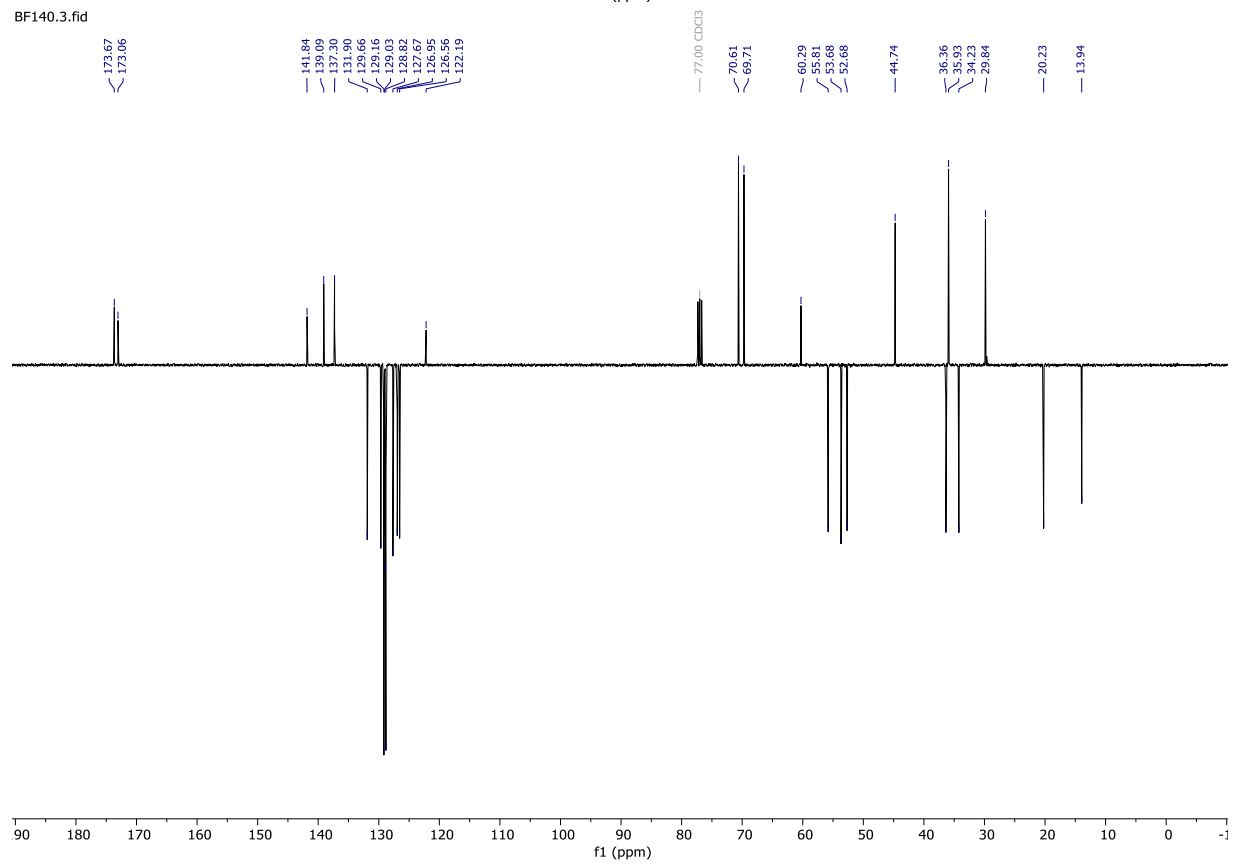





19

PAP139

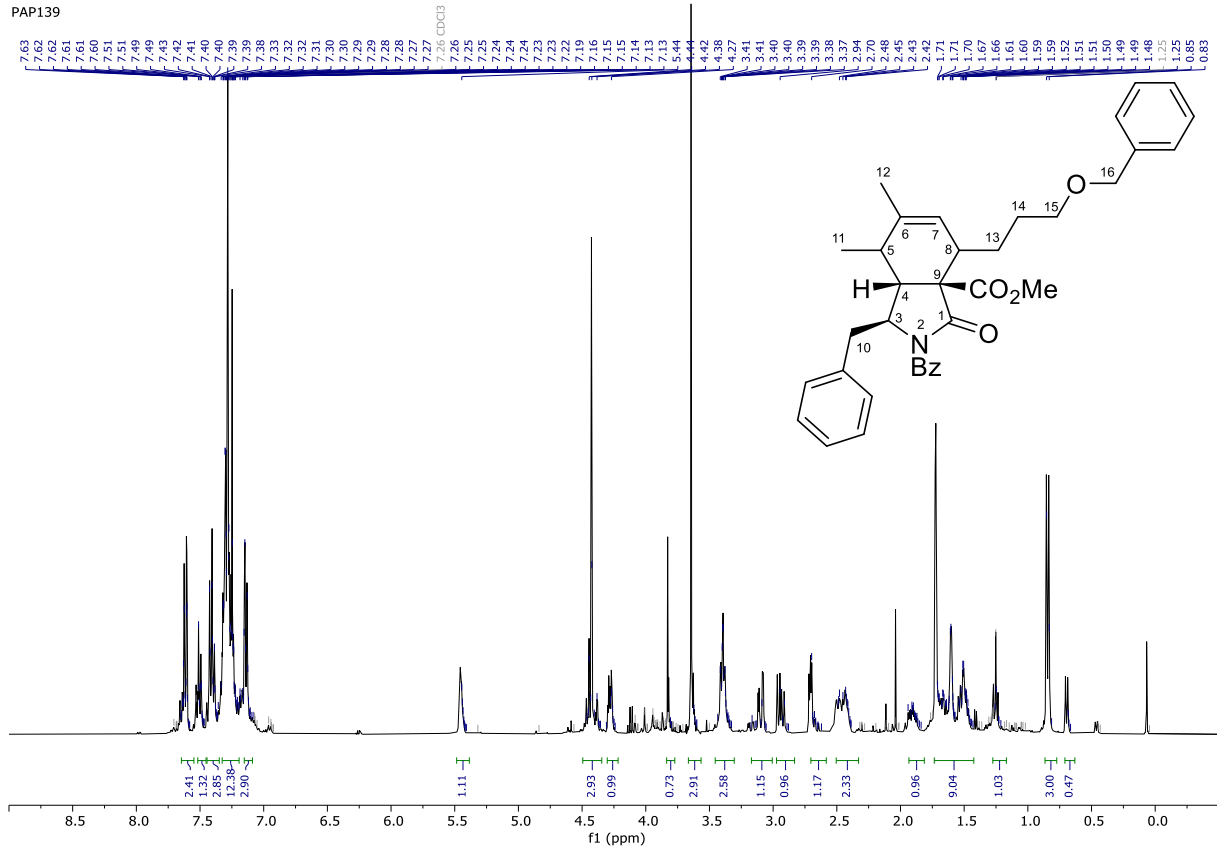

PAP139

Perlikova APT Experiment

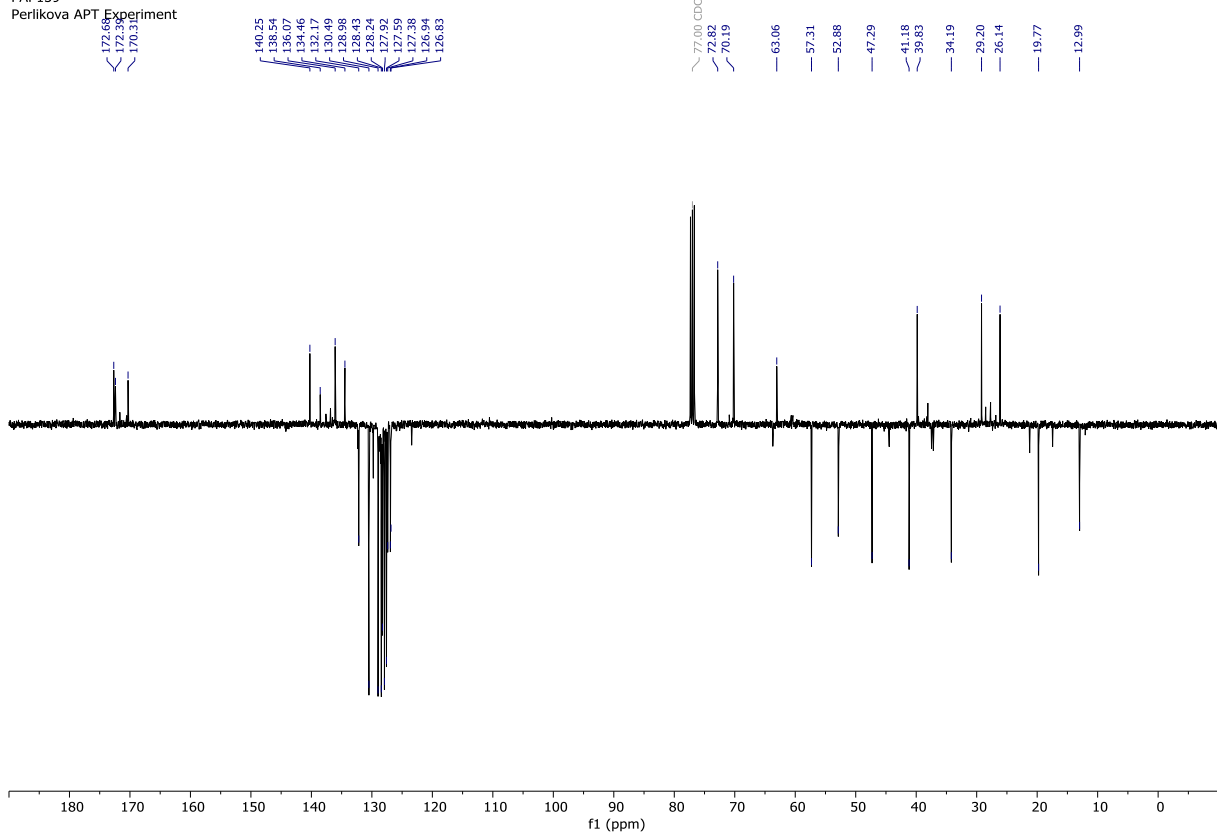

20

PAP144

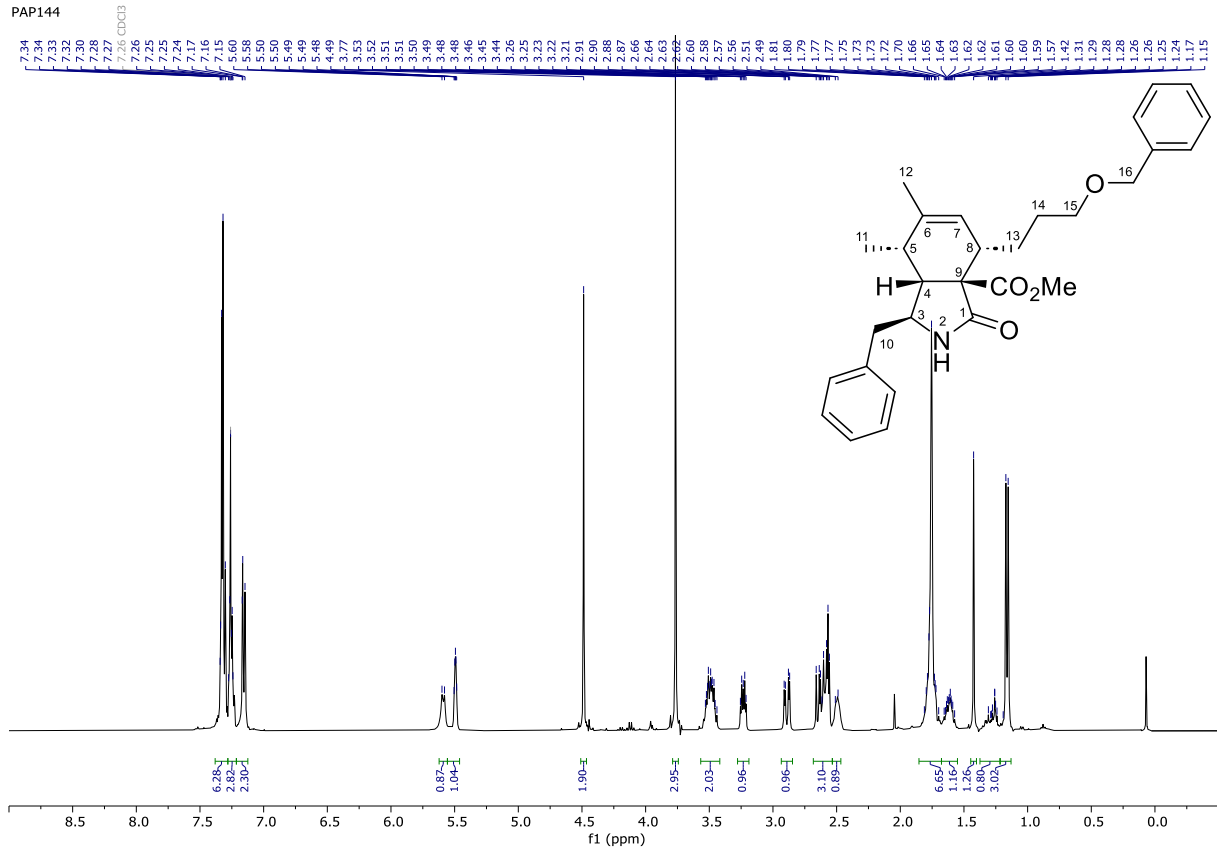

PAP144  
Perikova APT Experiment

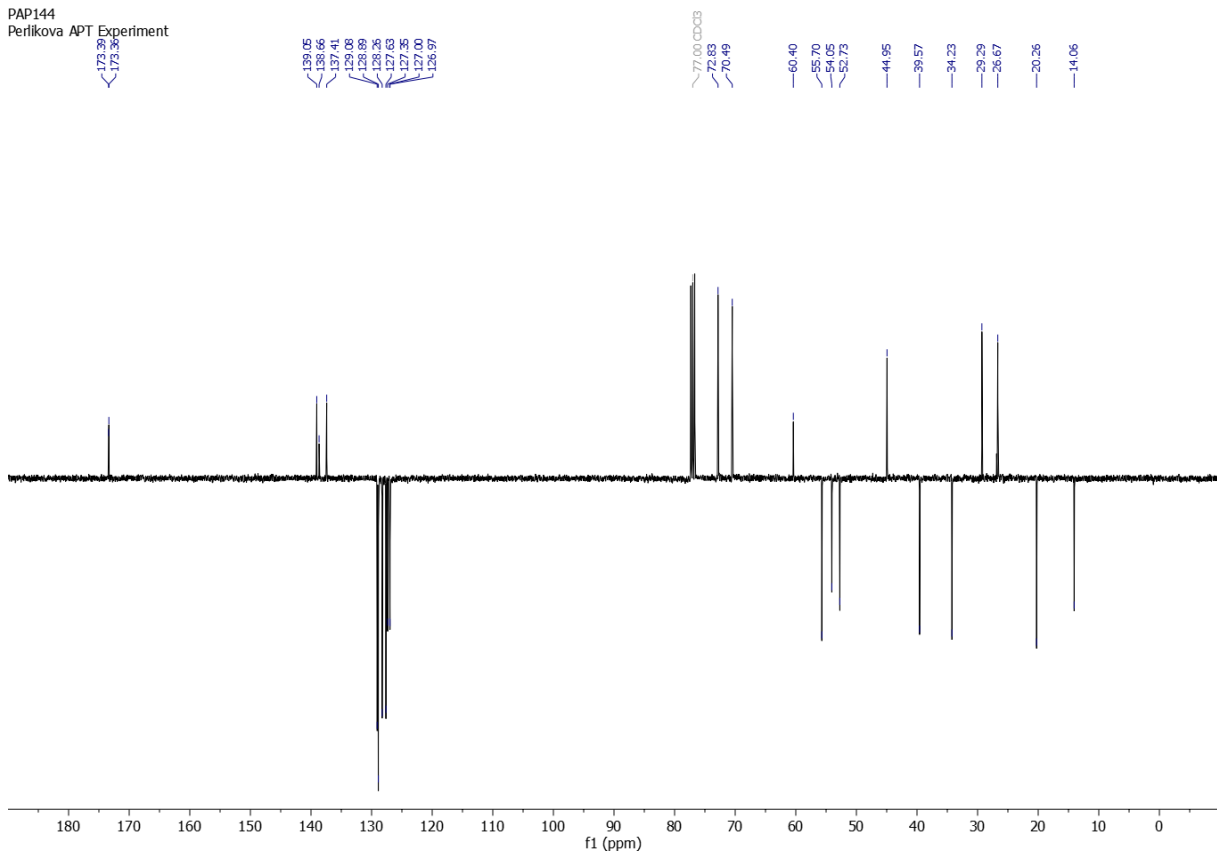

# 21a

DD-BF-296

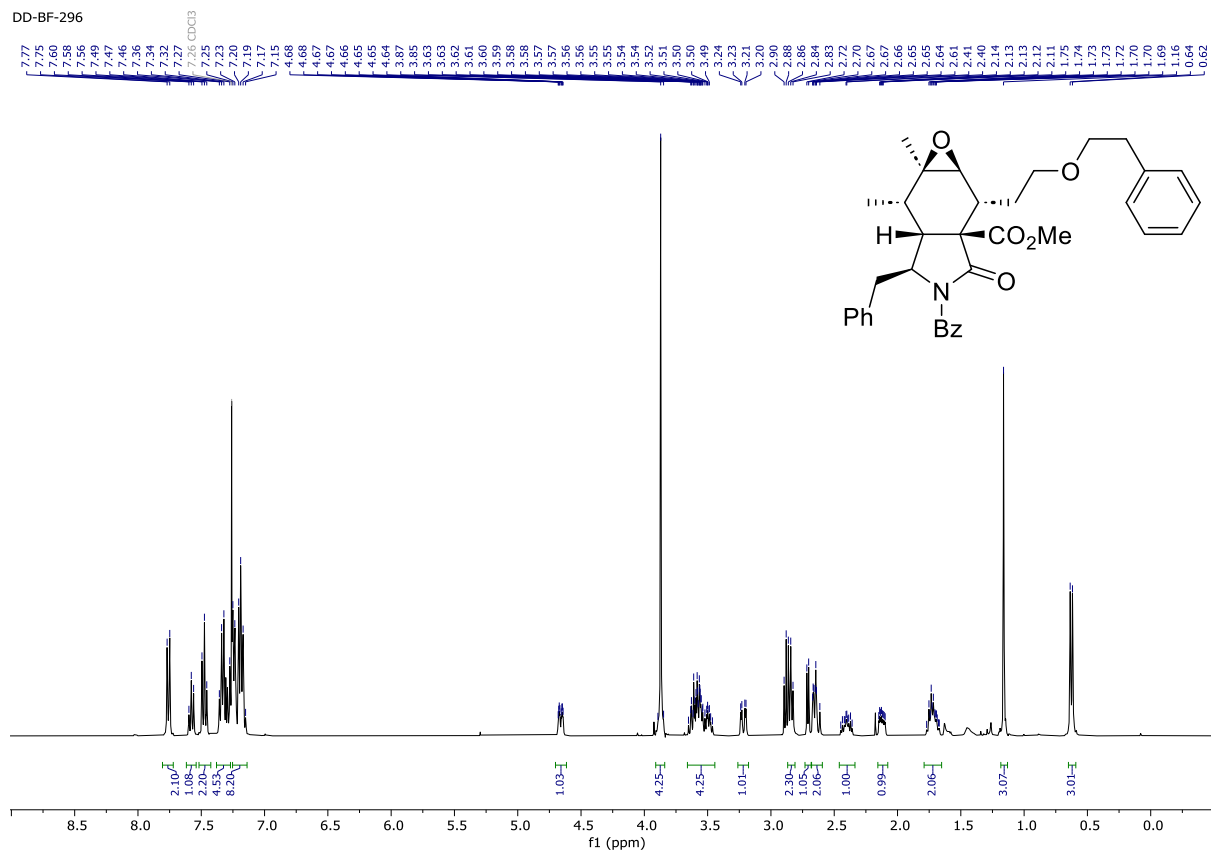

DD-BF-296

Perlikova APT Experiment

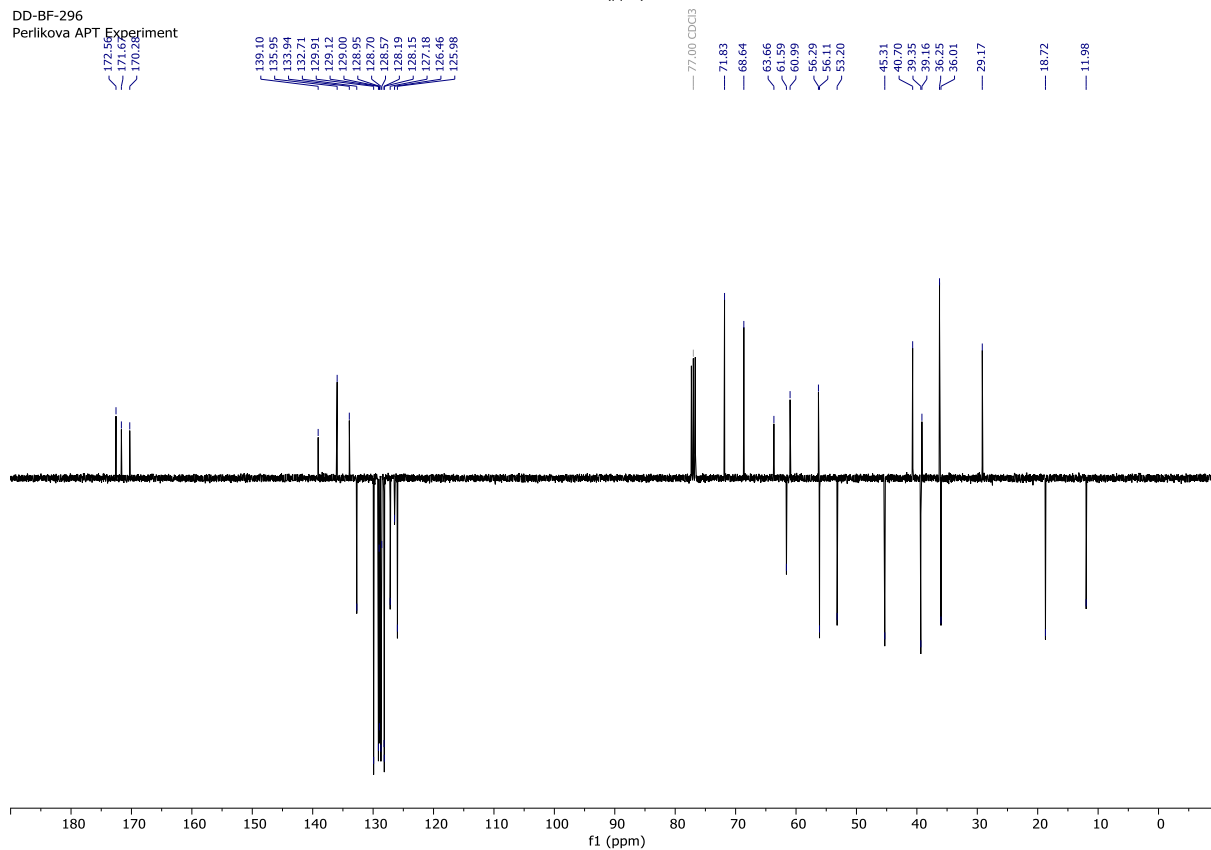

21b

BF289-2F

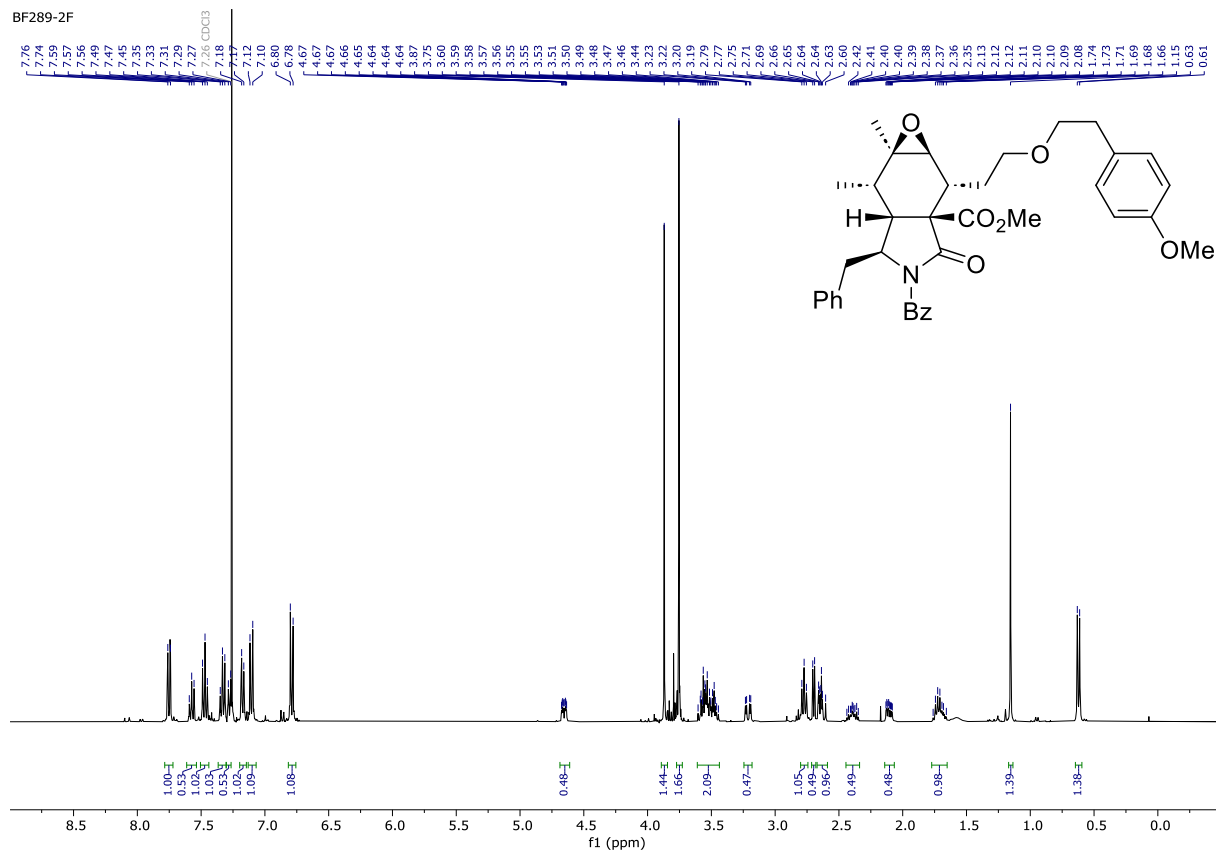

BF289-2F

Perlikova APT Experiment

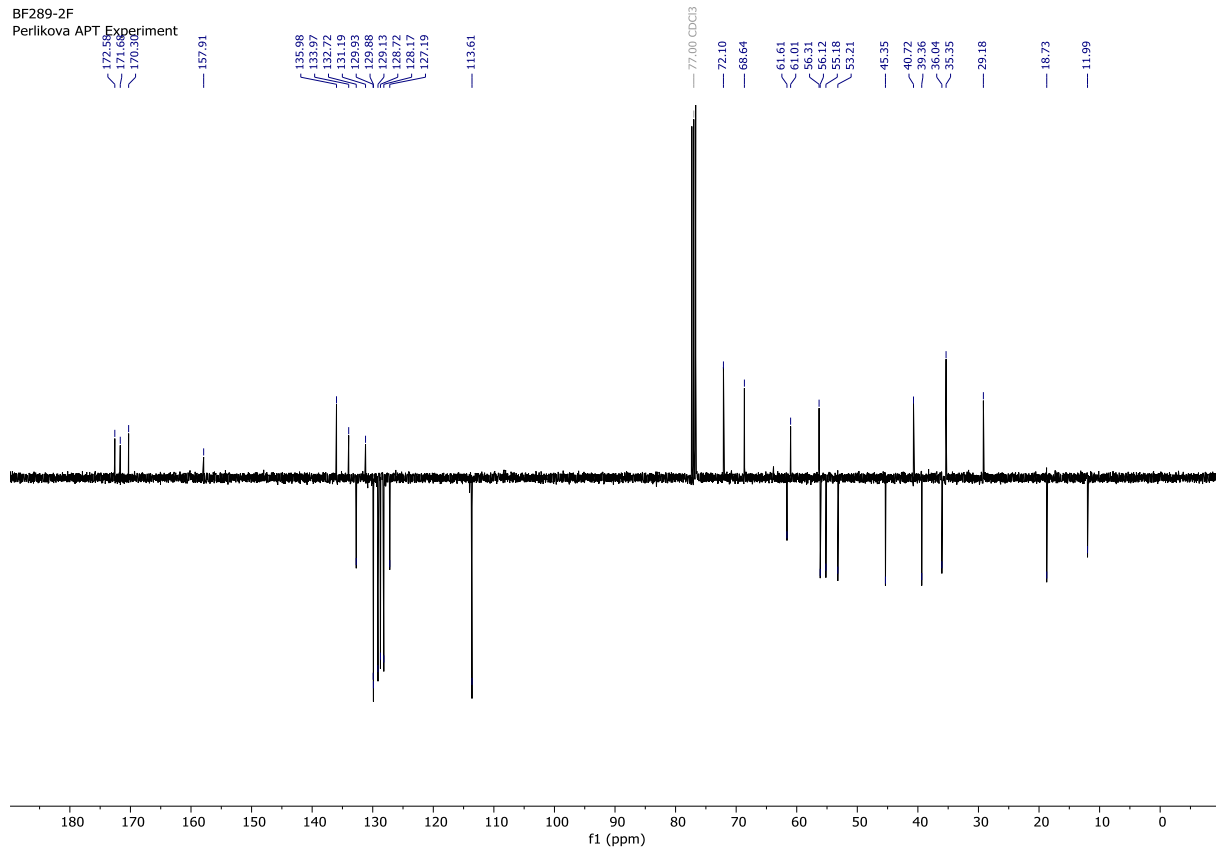

# 21h

BF288-2F

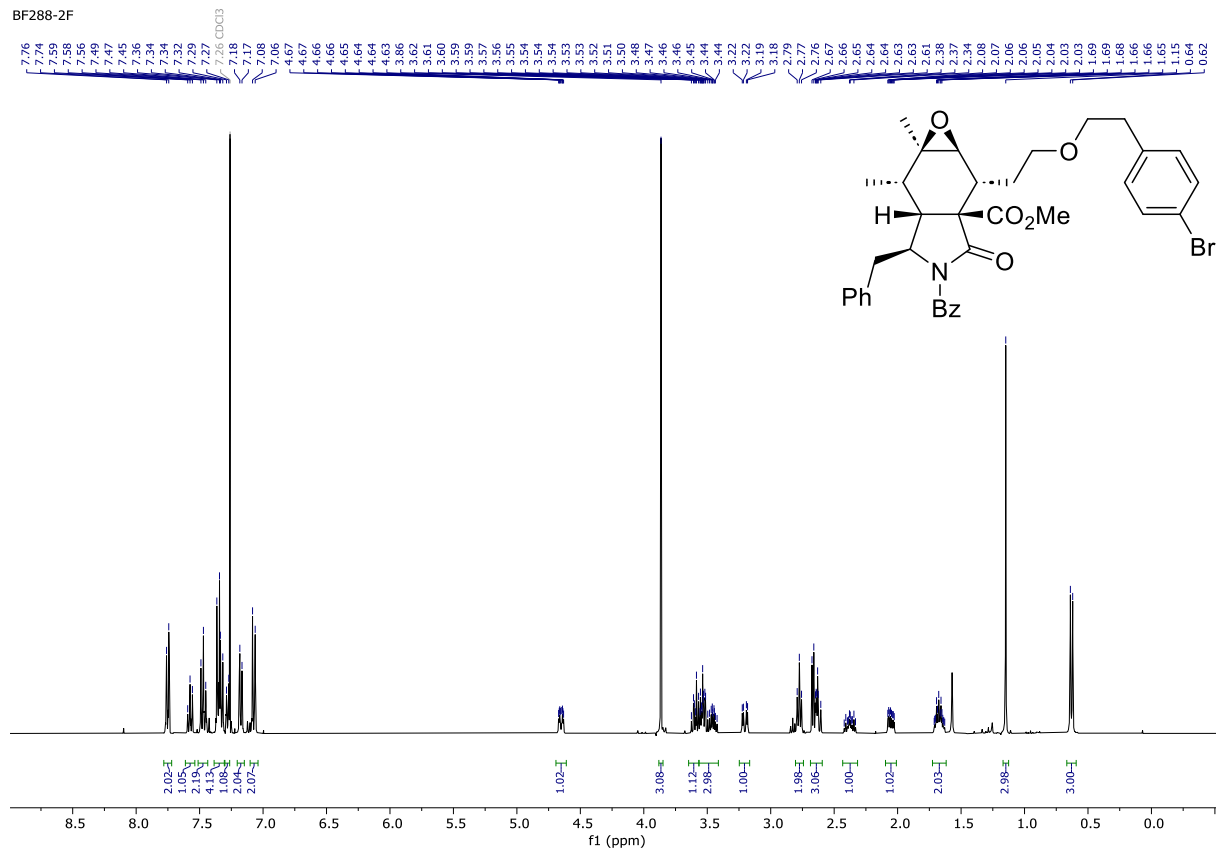

BF288-2F

Perlikova APT Experiment

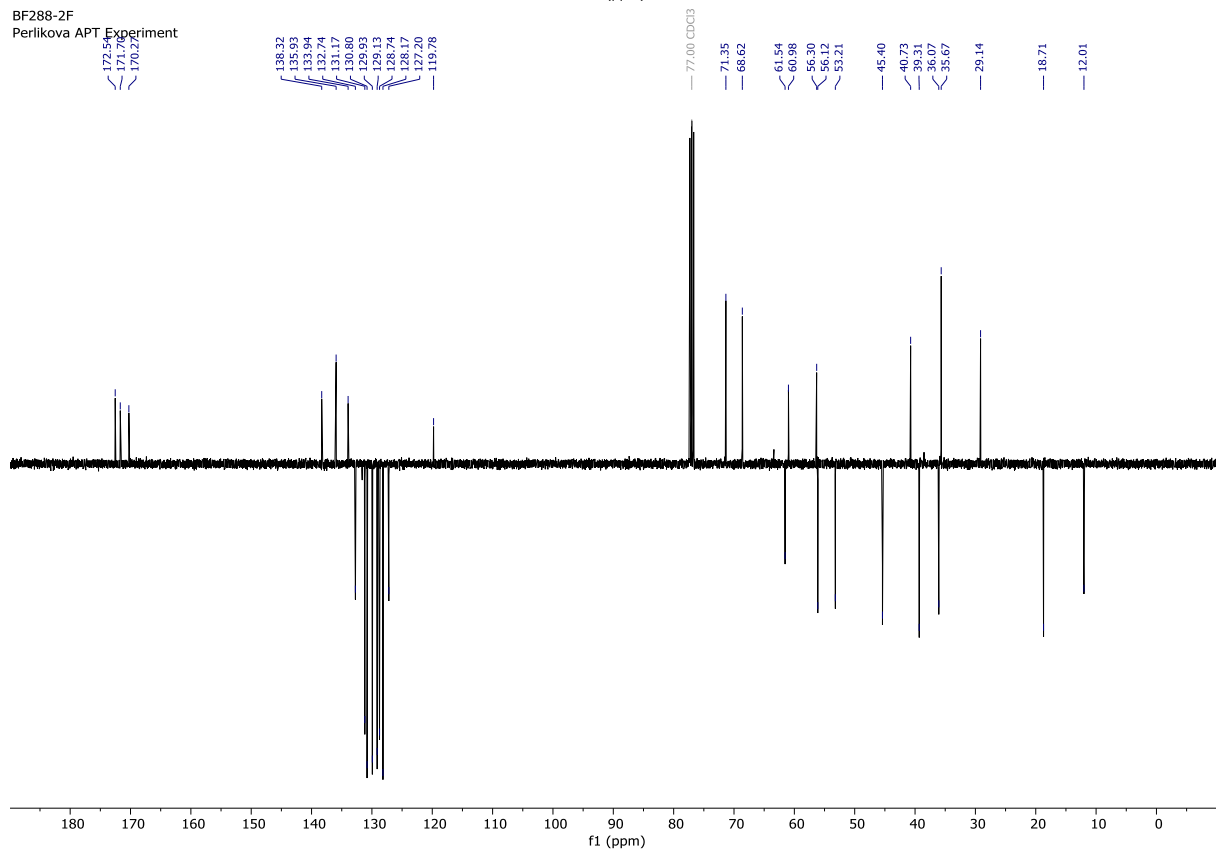

22a

BF141.1.fid

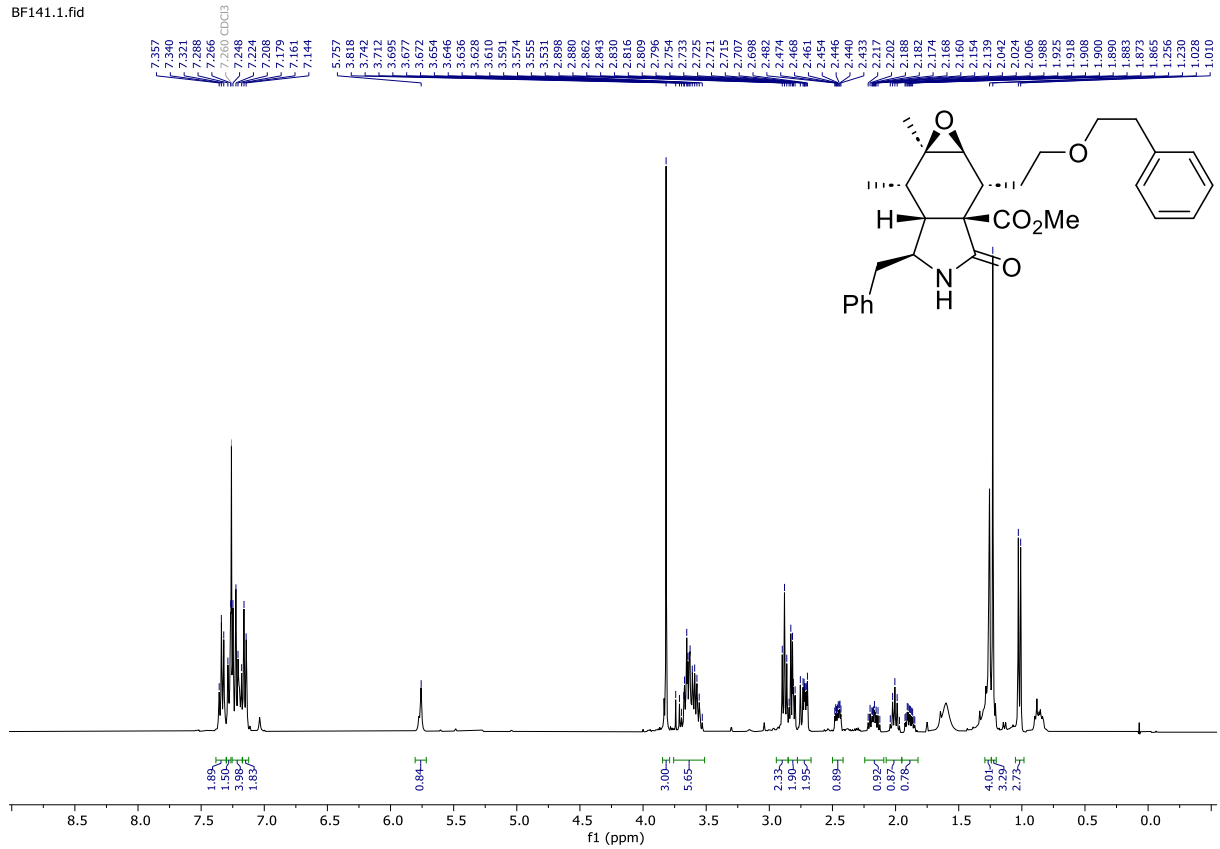

BF141.2.fid

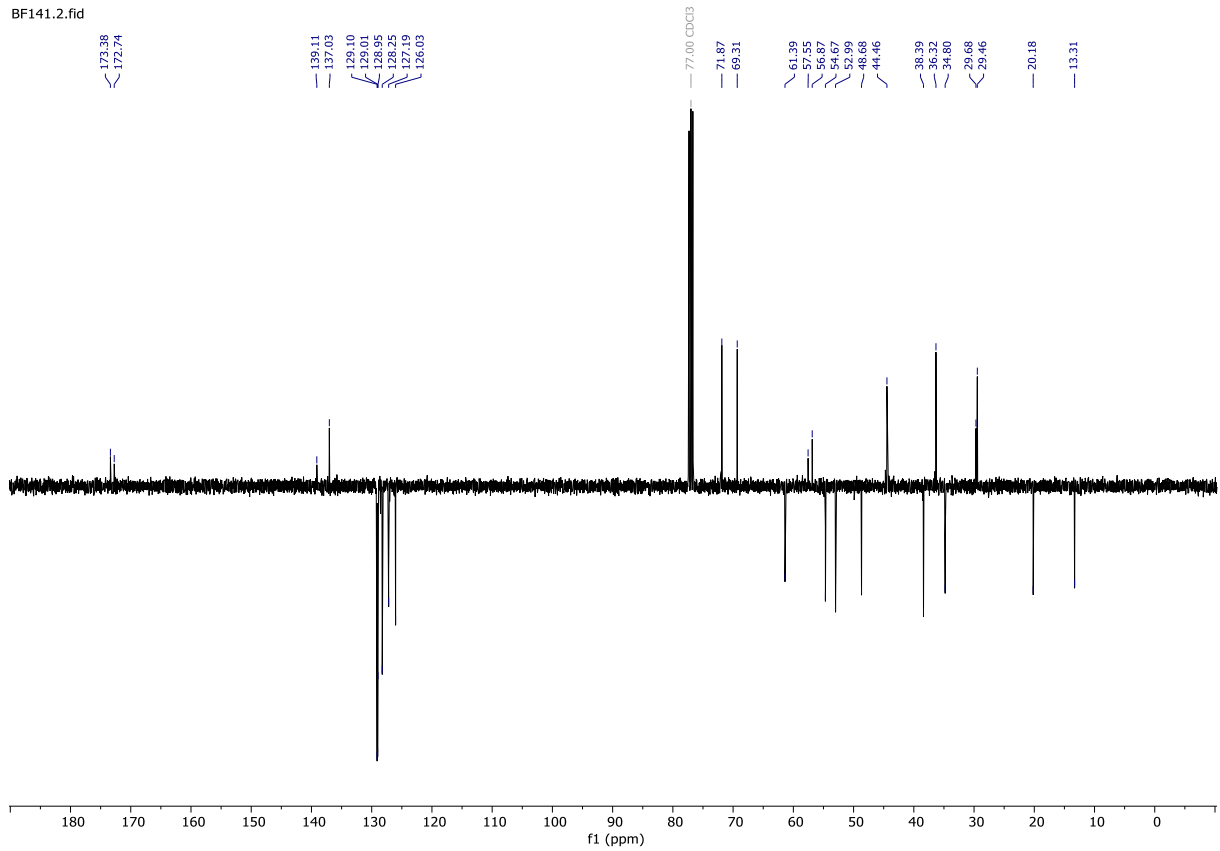







23a

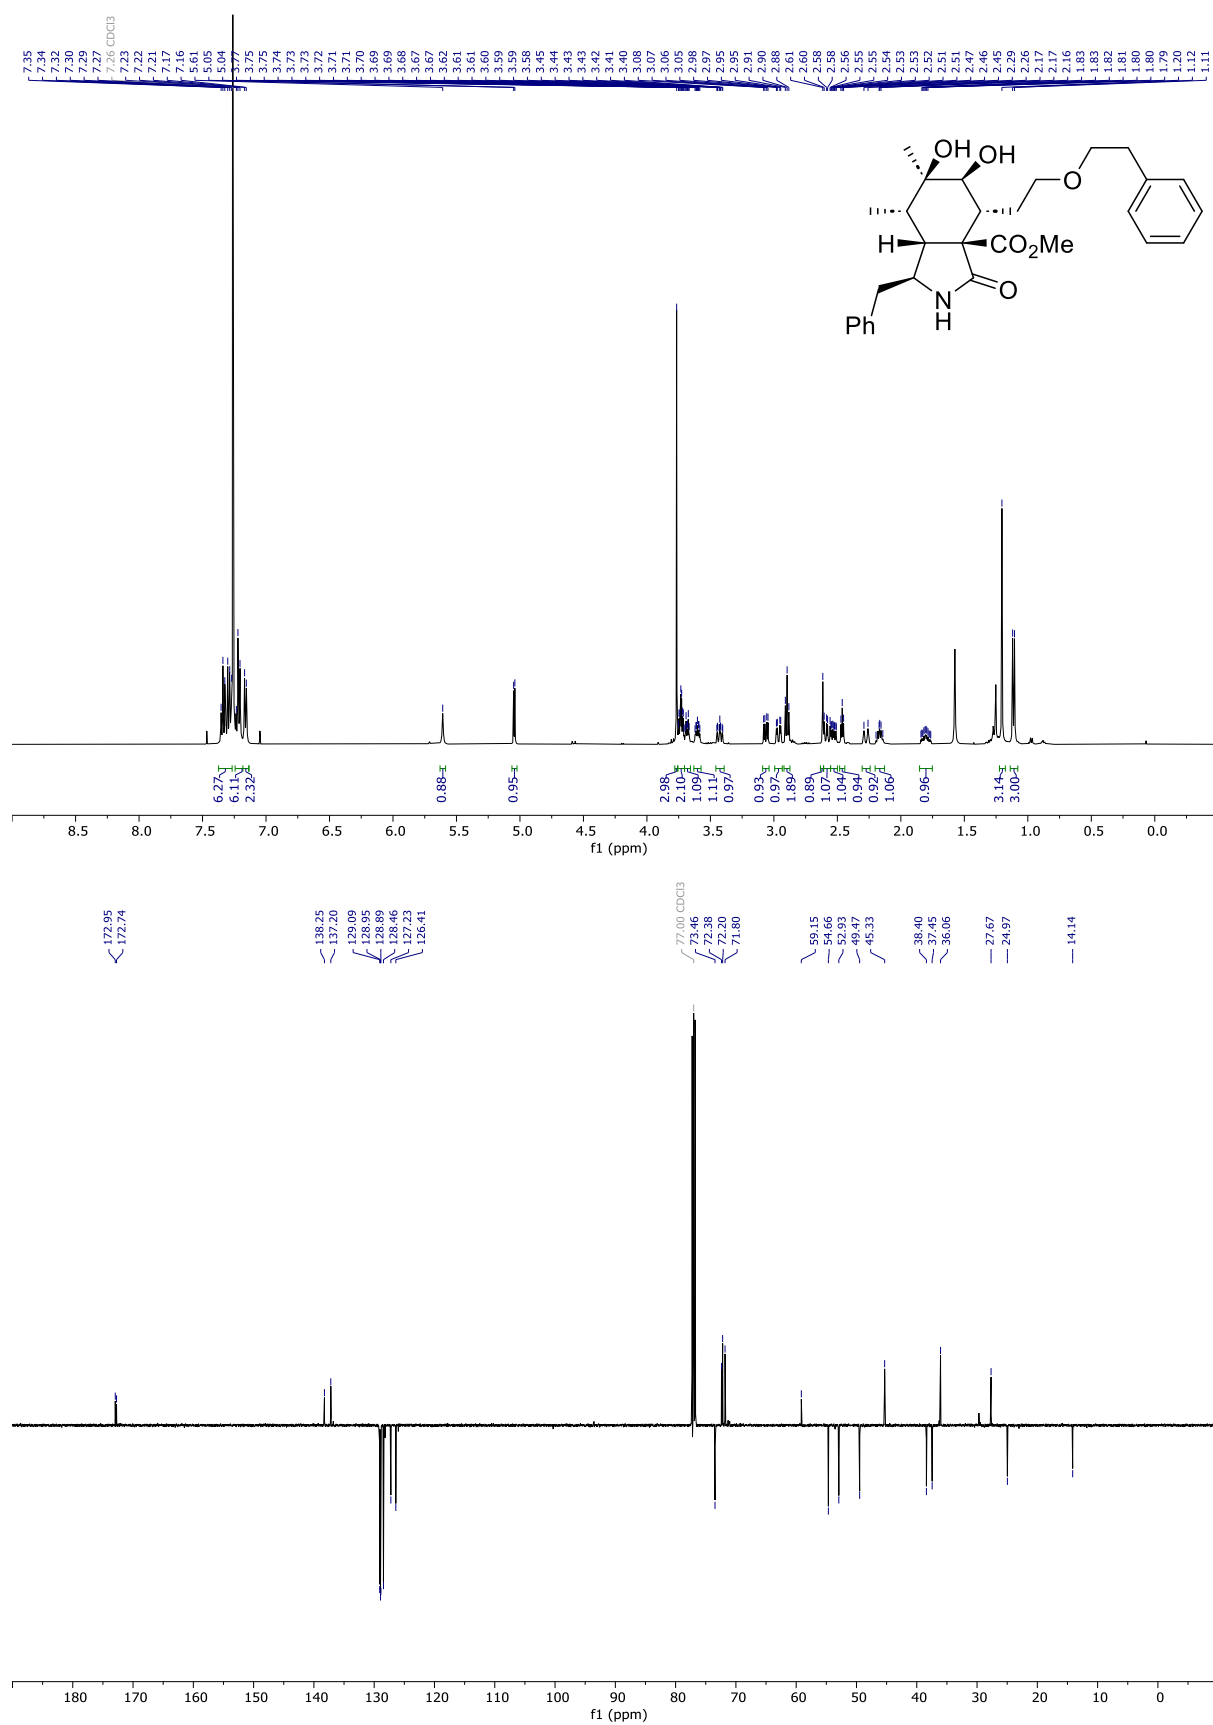

# 23b

BF291

7.35  
7.33  
7.31  
7.28  
7.26 CDCl<sub>3</sub>  
7.24  
7.22  
7.20  
7.18  
7.15  
7.13  
7.11  
7.09  
6.86  
6.85  
6.83  
6.81  
6.85  
3.78  
3.75  
3.71  
3.69  
3.69  
3.67  
3.66  
3.64  
3.63  
3.62  
3.62  
3.61  
3.60  
3.59  
3.59  
3.44  
3.44  
3.42  
3.42  
3.41  
3.39  
3.38  
3.38  
3.08  
3.05  
2.98  
2.97  
2.94  
2.93  
2.93  
2.85  
2.83  
2.81  
3.18  
3.15  
3.15  
2.62  
2.60  
2.59  
2.56  
2.56  
2.56  
2.54  
2.54  
2.53  
2.53  
2.51  
2.51  
2.47  
2.46  
2.46  
2.27  
2.27  
2.24  
2.20  
2.20  
2.19  
2.19  
2.17  
2.17  
2.15  
2.15  
2.14  
2.14  
1.84  
1.83  
1.82  
1.81  
1.80  
1.79  
1.78  
1.77  
1.76  
1.75  
1.75  
1.11  
1.09

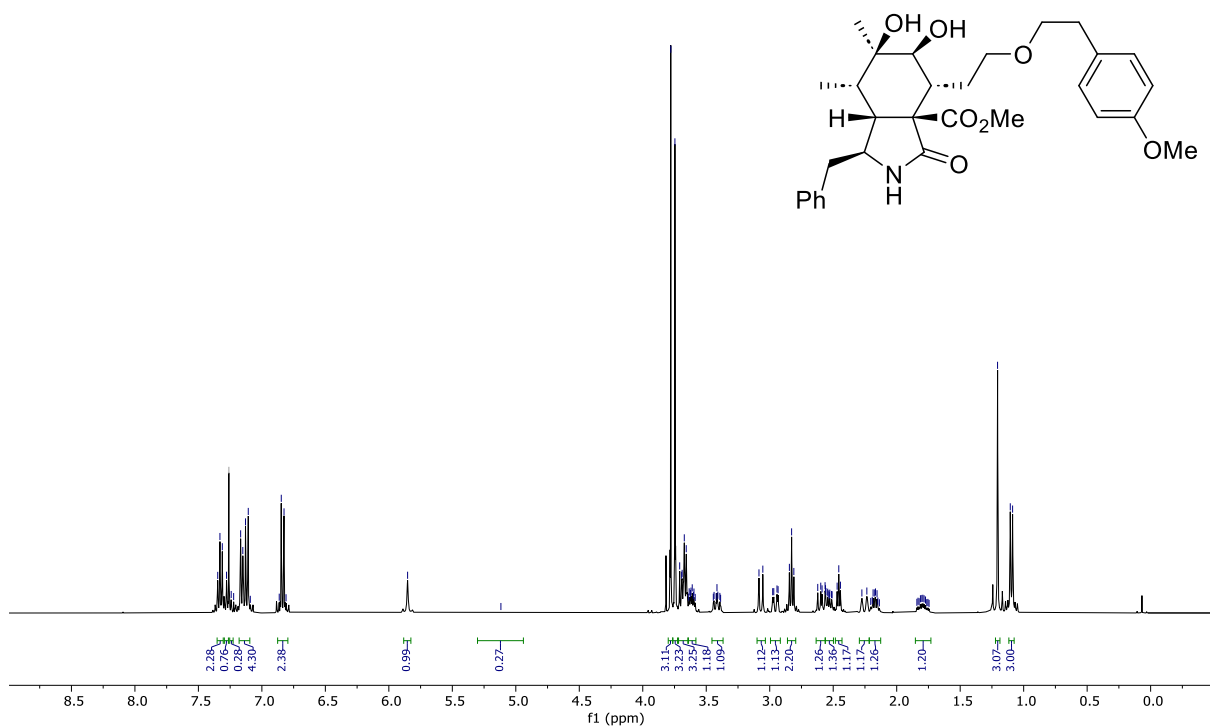

BF291  
Perlikova APT Experiment

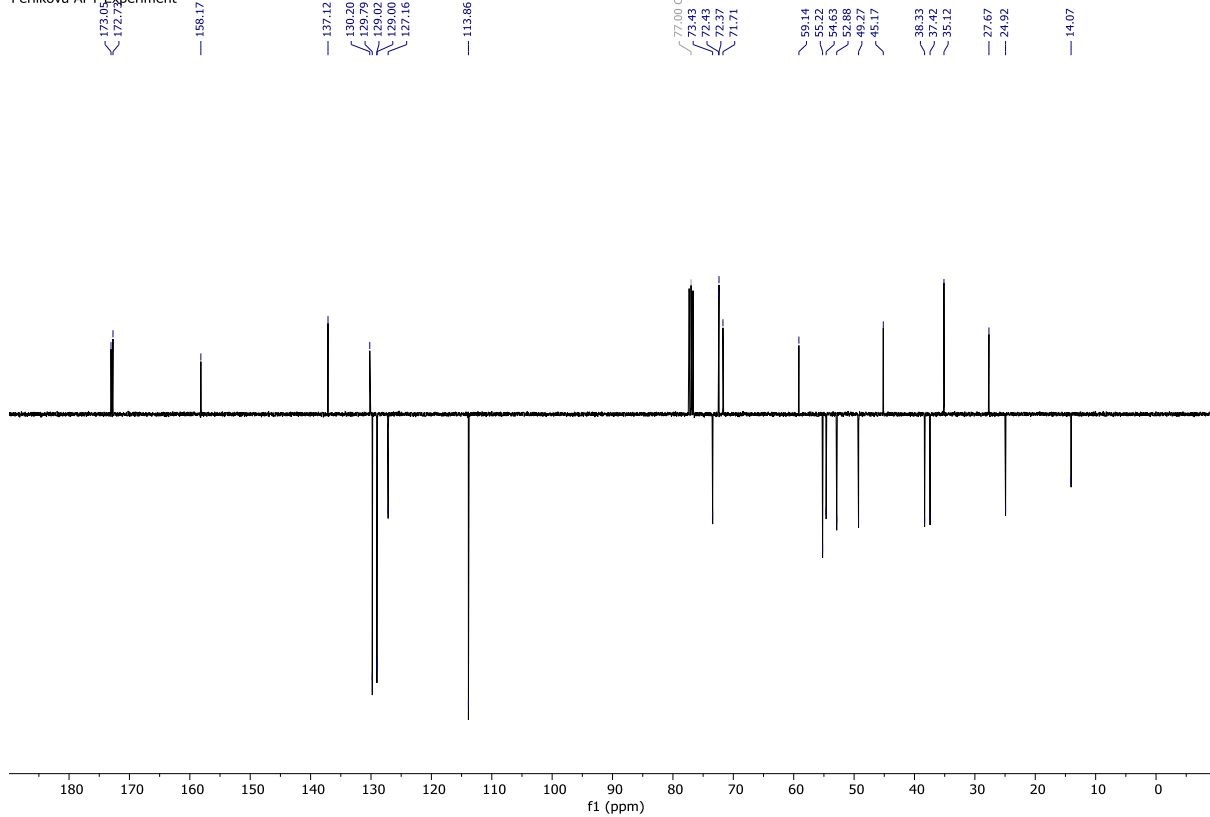

# 23h

BF265-2-2F.1.fid

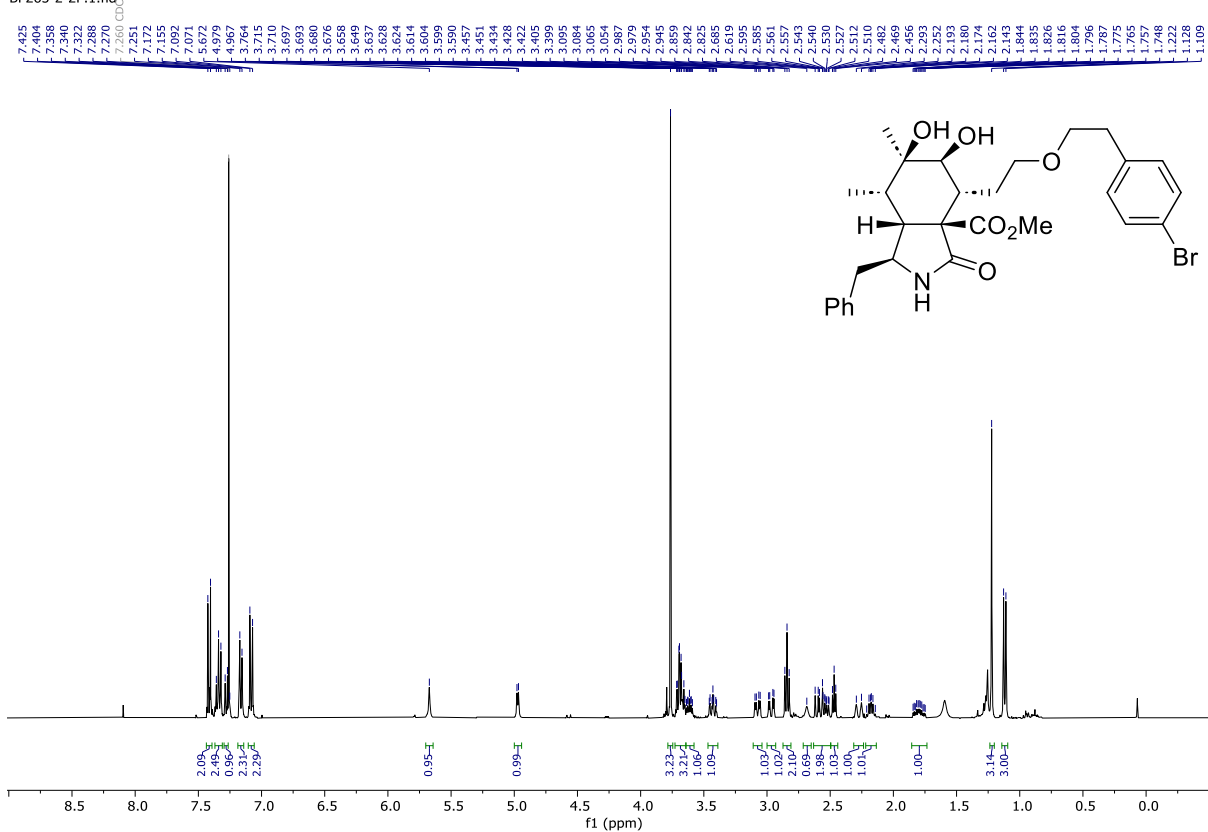

BF290  
Perlikova APT Experiment

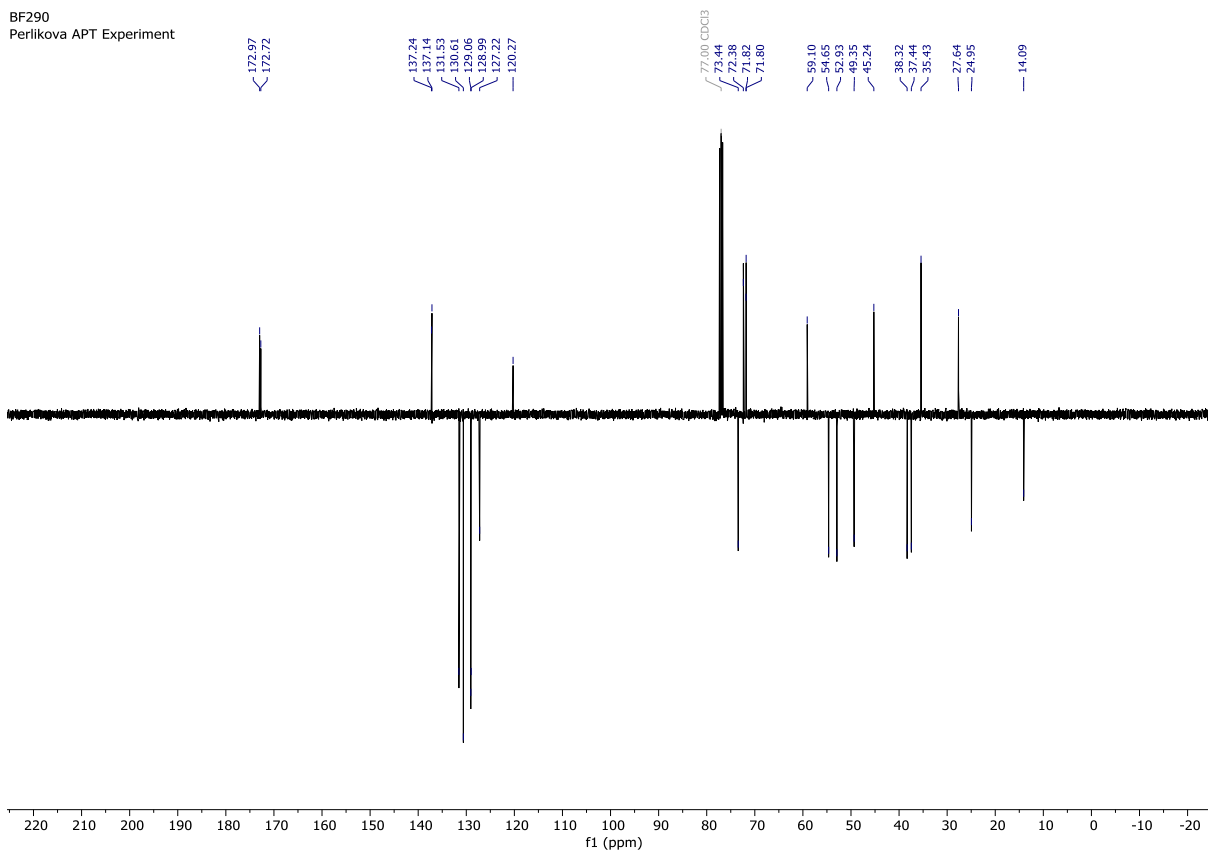

BF-299-HPLC-910

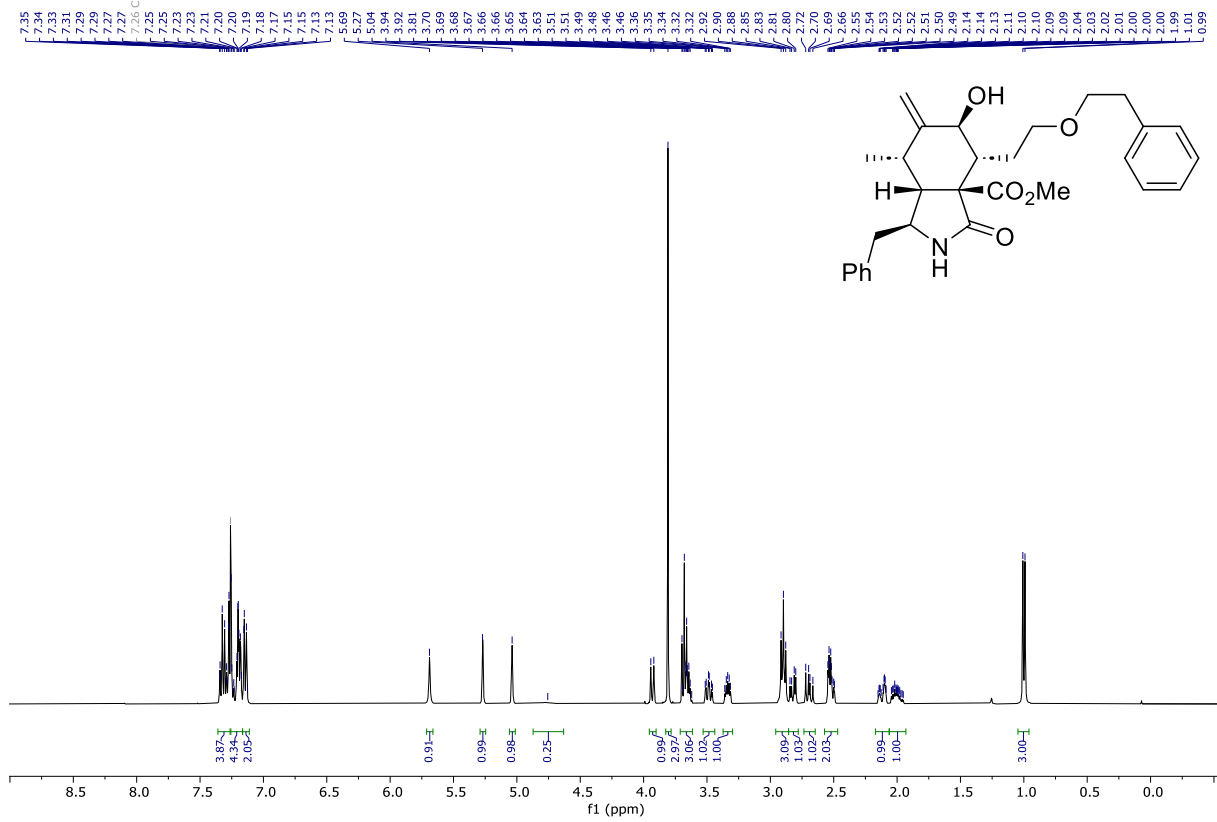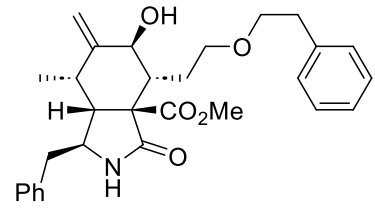

BF-299-HPLC-910  
Perlikova APT Experiment

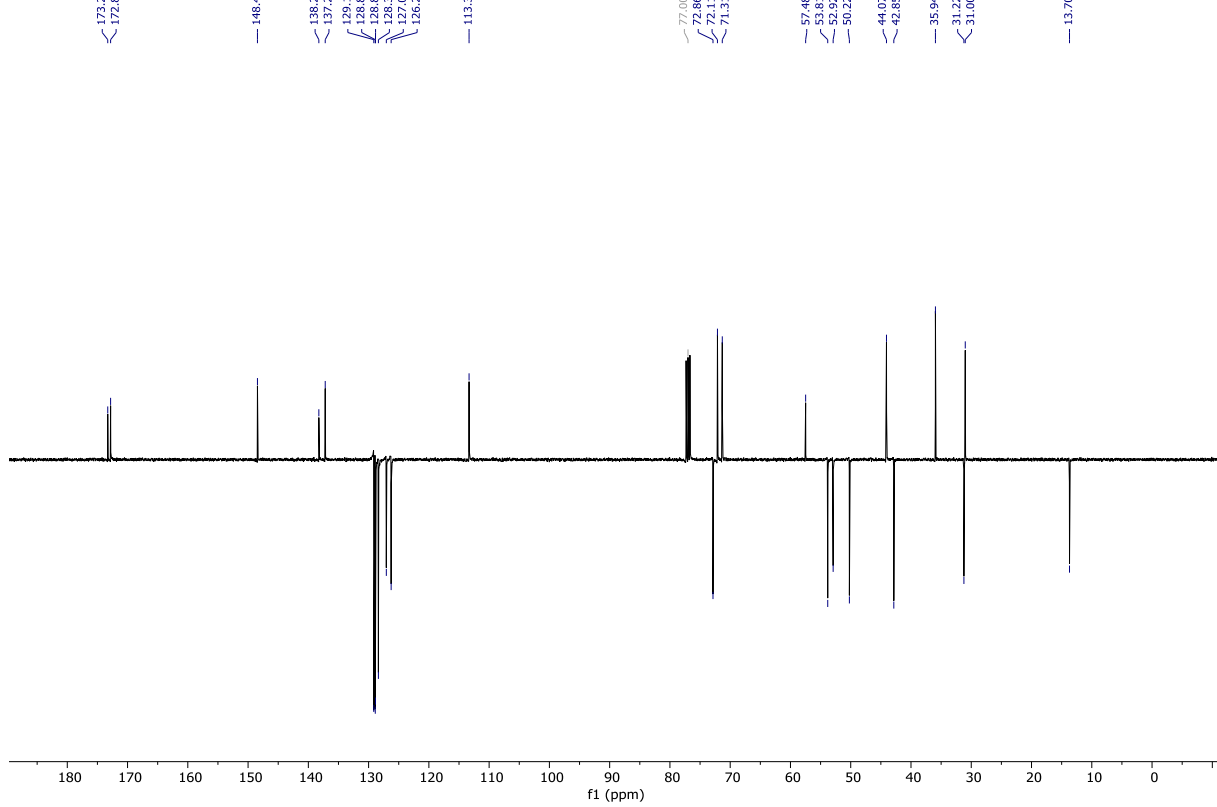

BF-22-365\_HPLC-f8

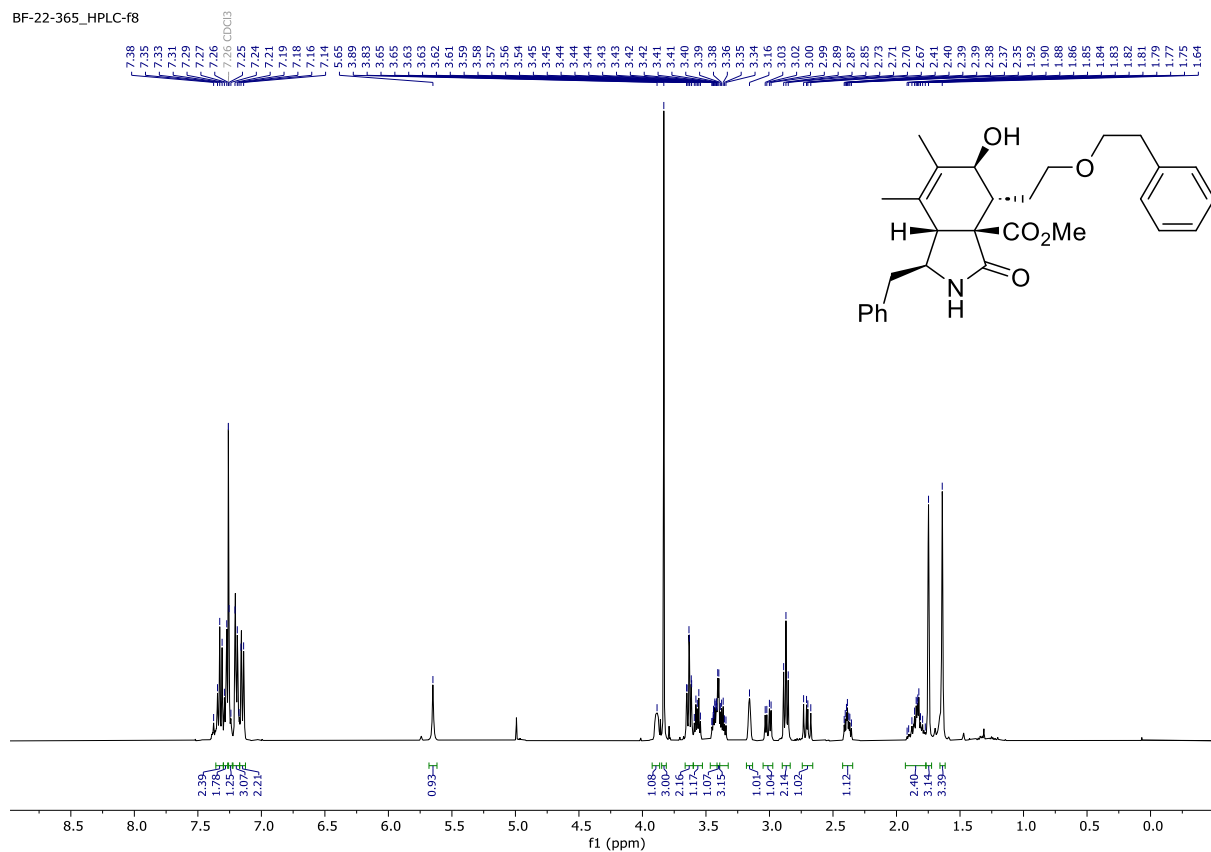

BF-22-365\_HPLC-f8-APT

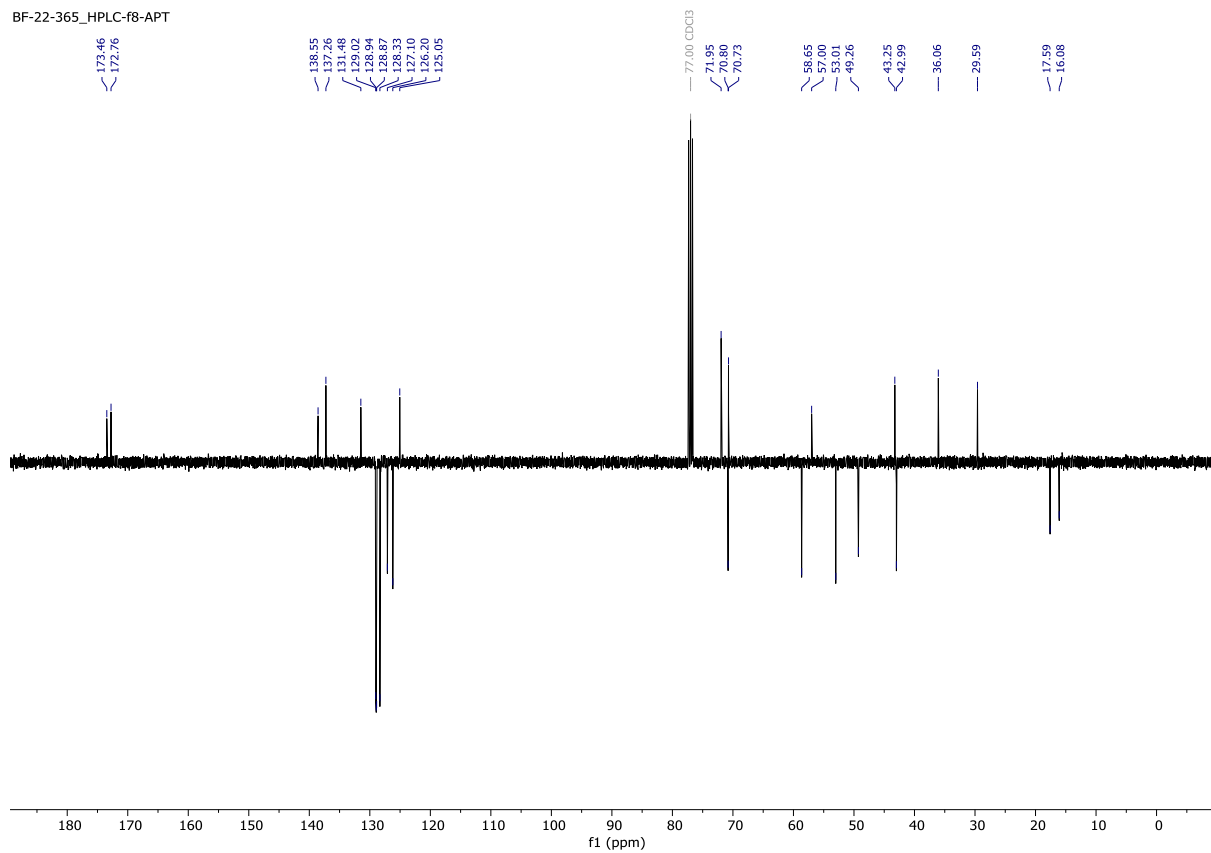

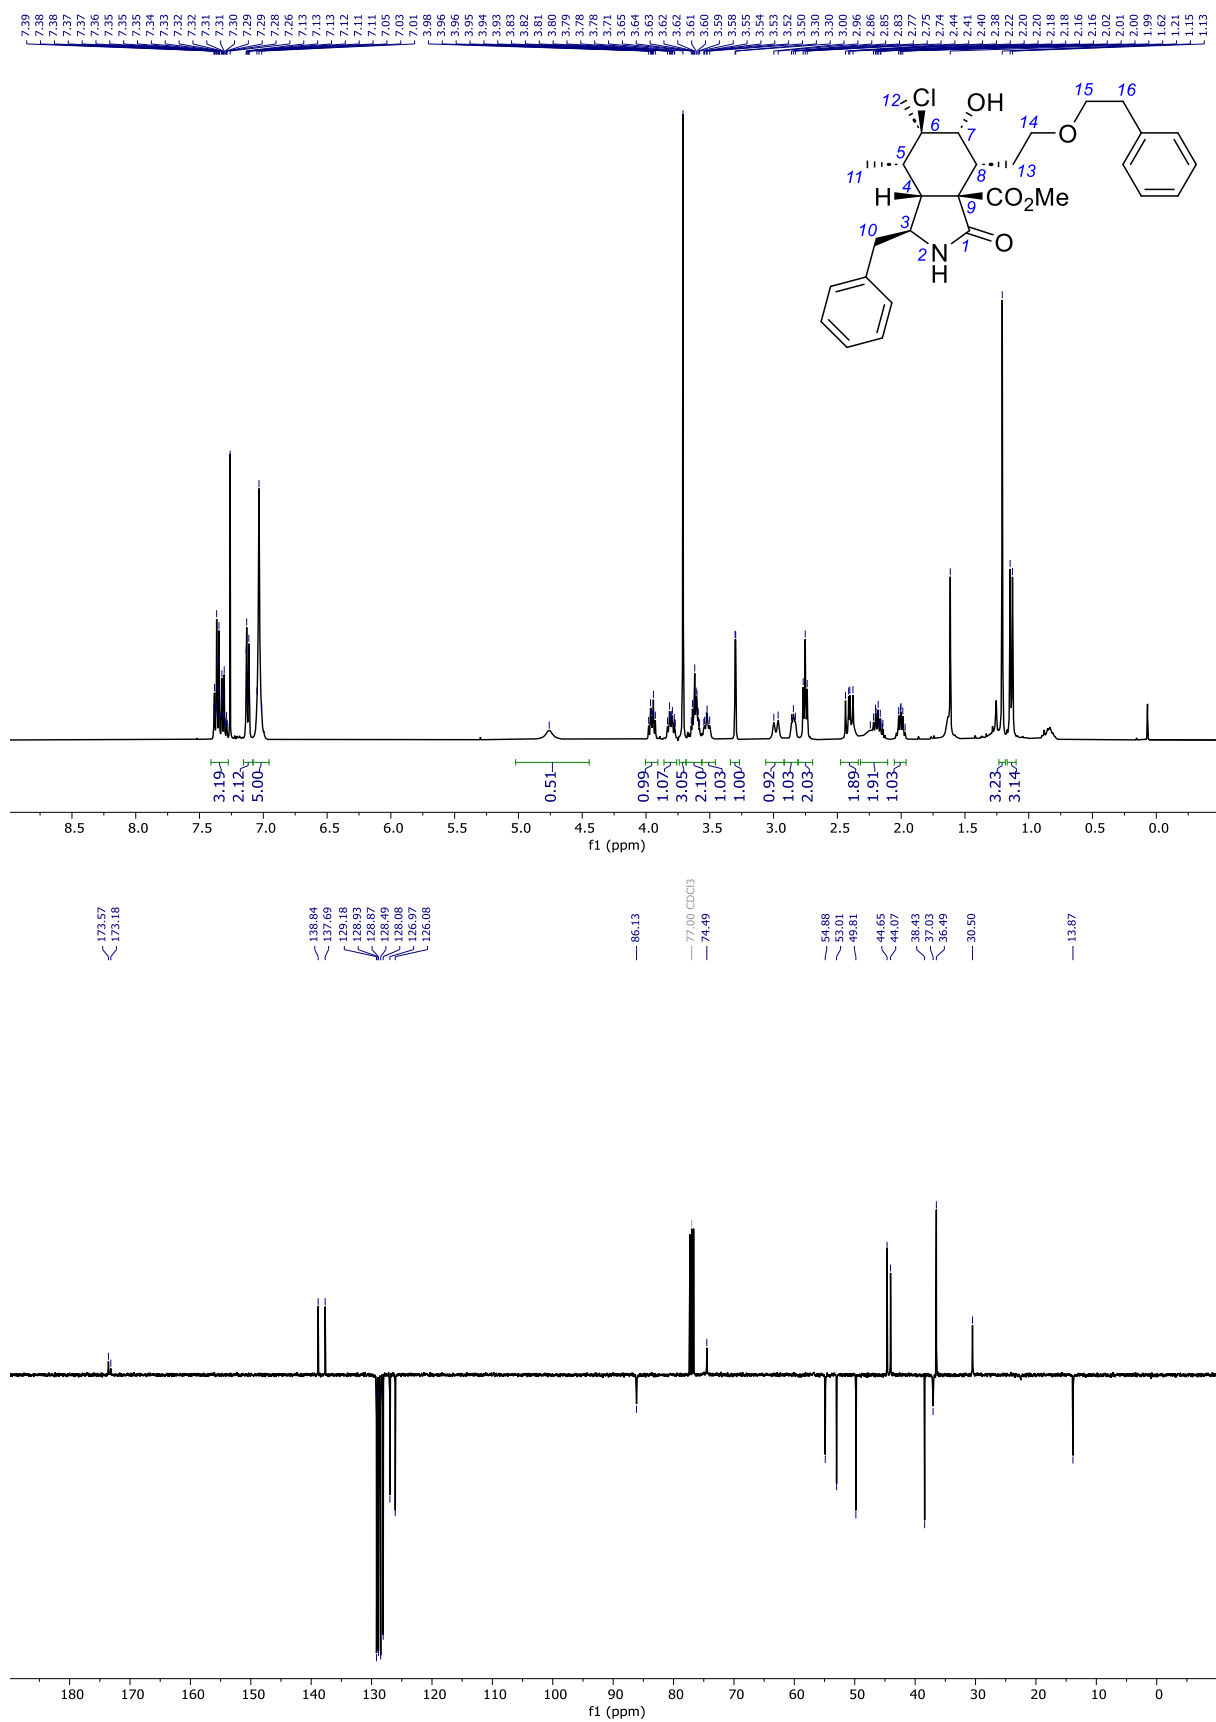

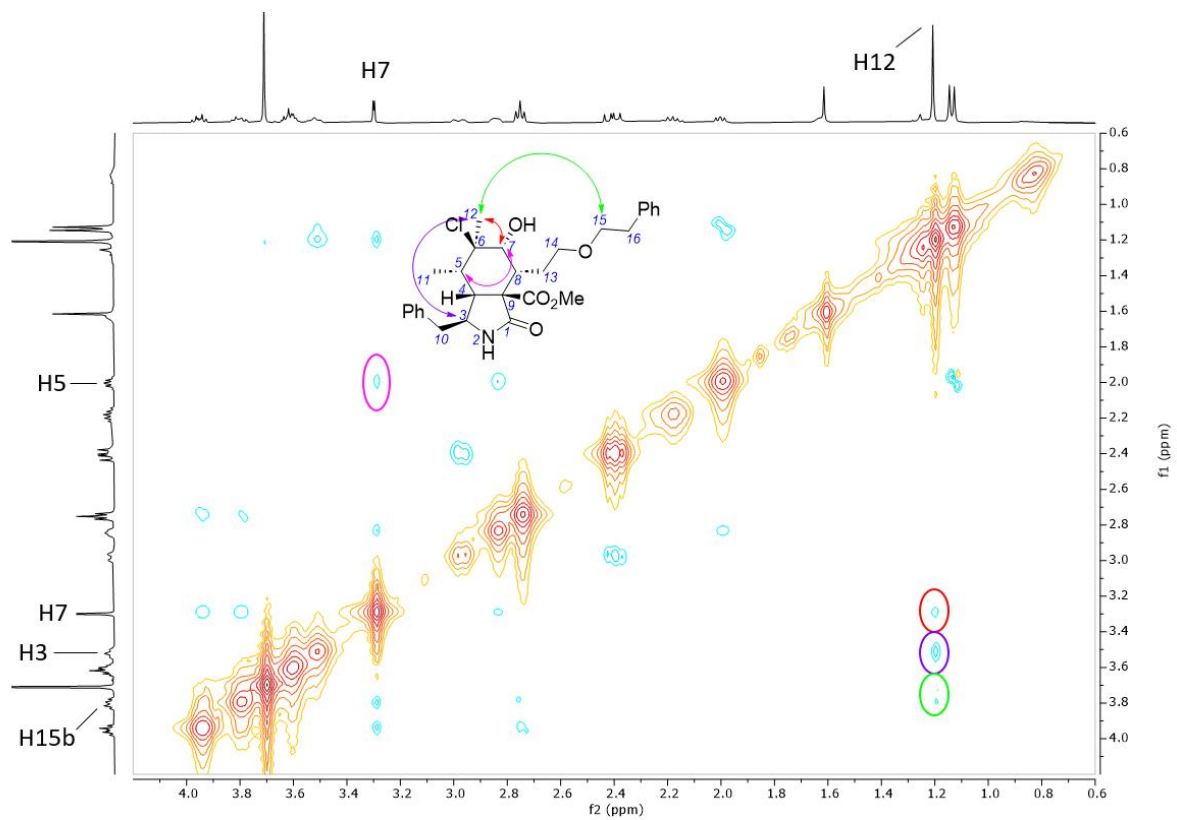



BF-378-51p

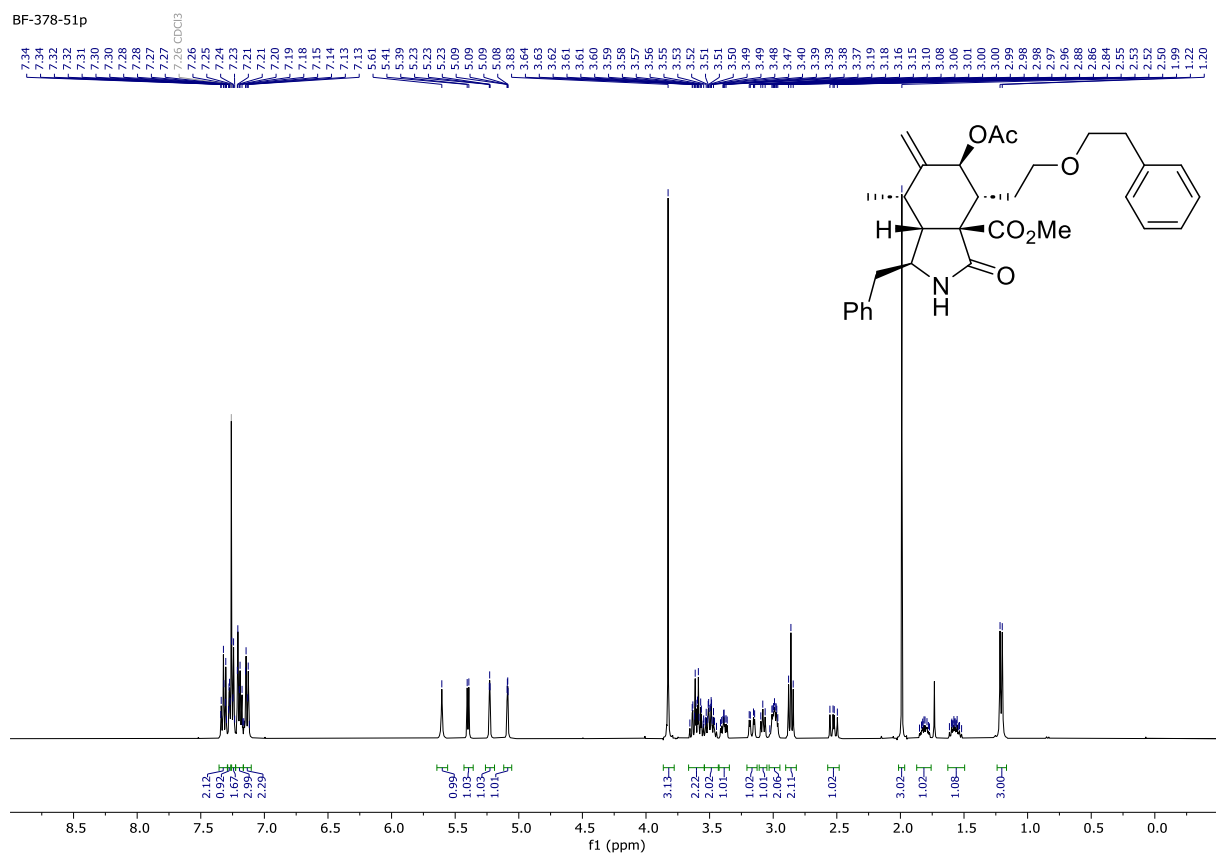

BF-378-51p

Perlikova APT Experiment

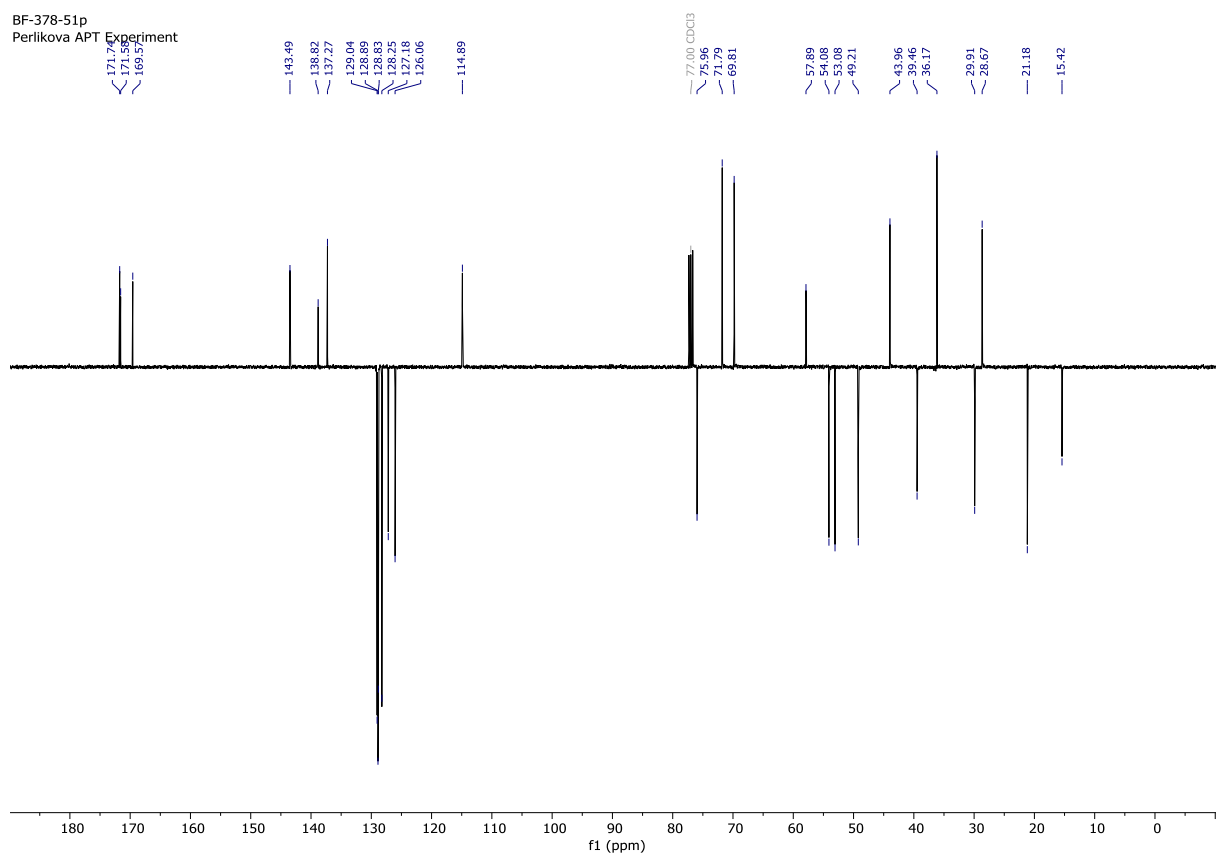

BF-22-378\_HPLC-56

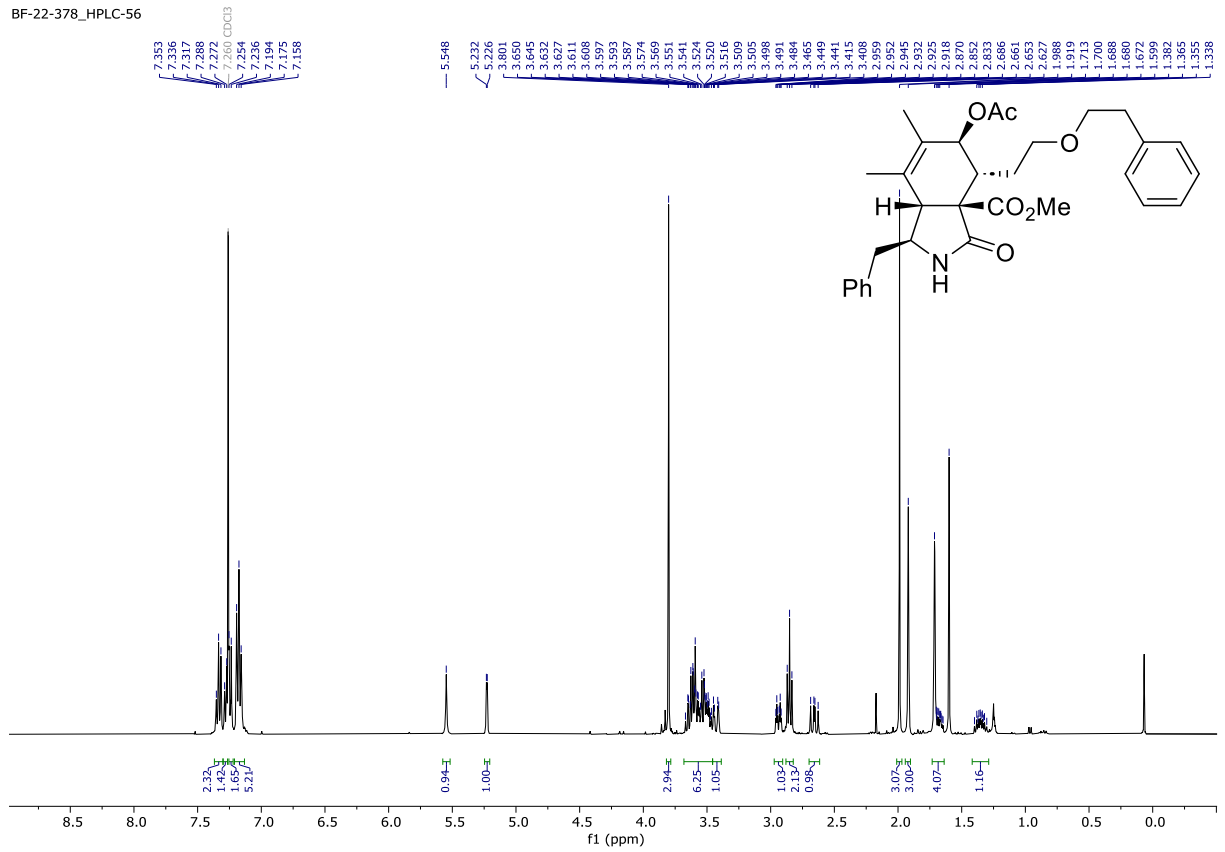

BF378-56  
Perlikova APT Experiment

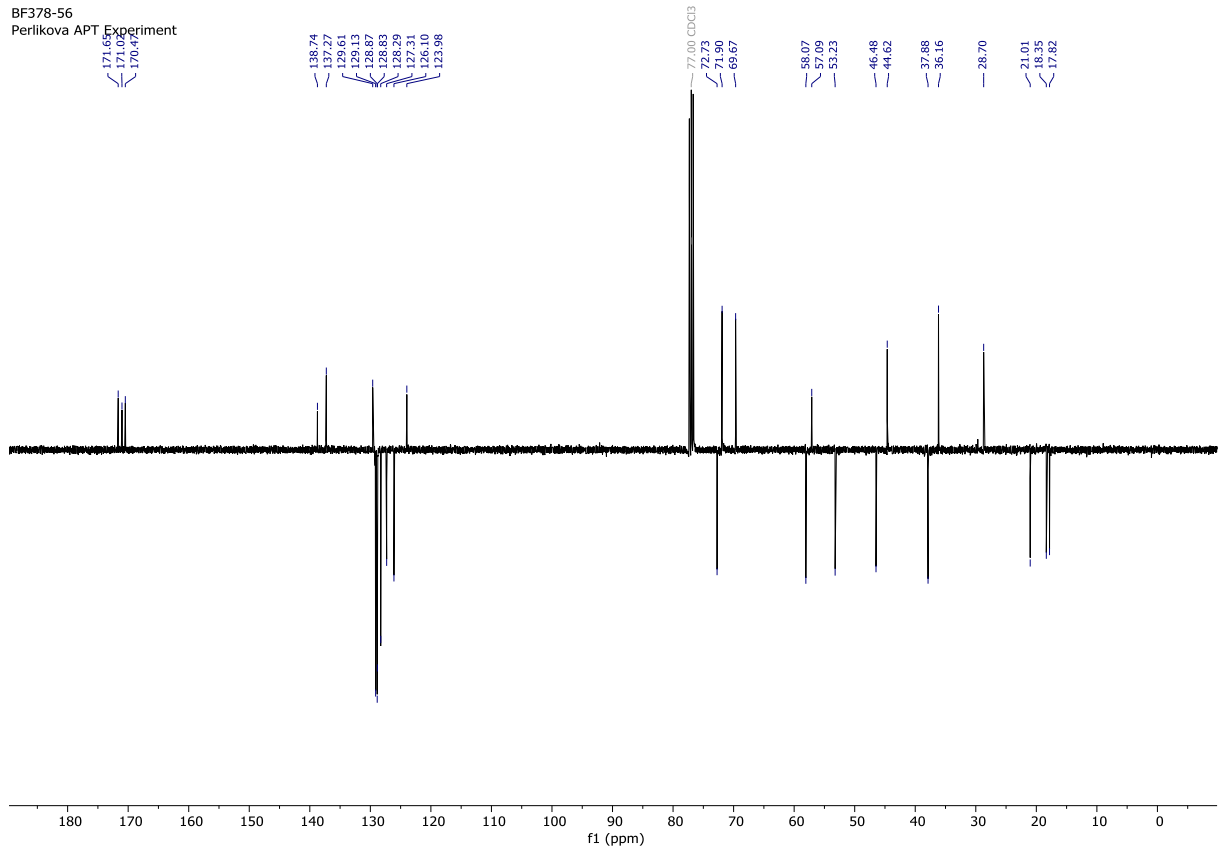

BF298-2F

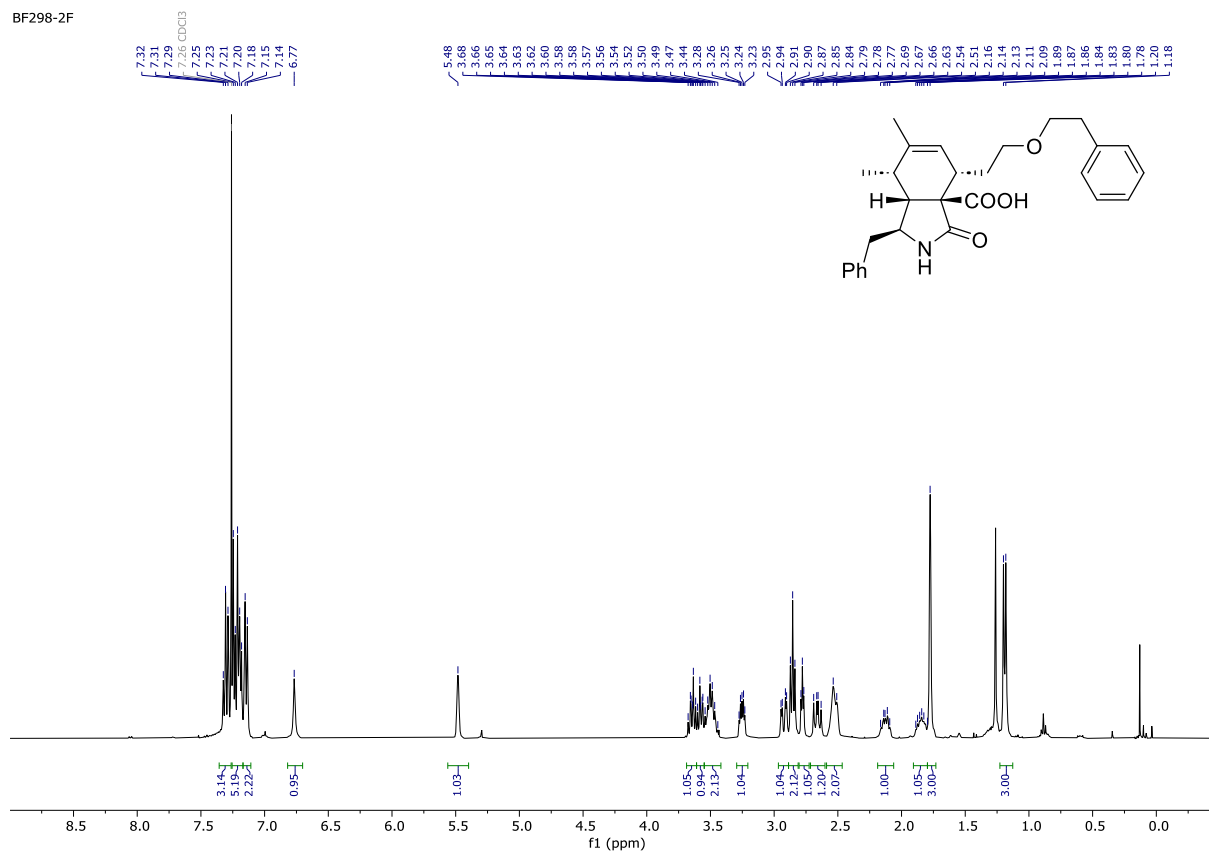BF298-2F  
Perlikova APT Experiment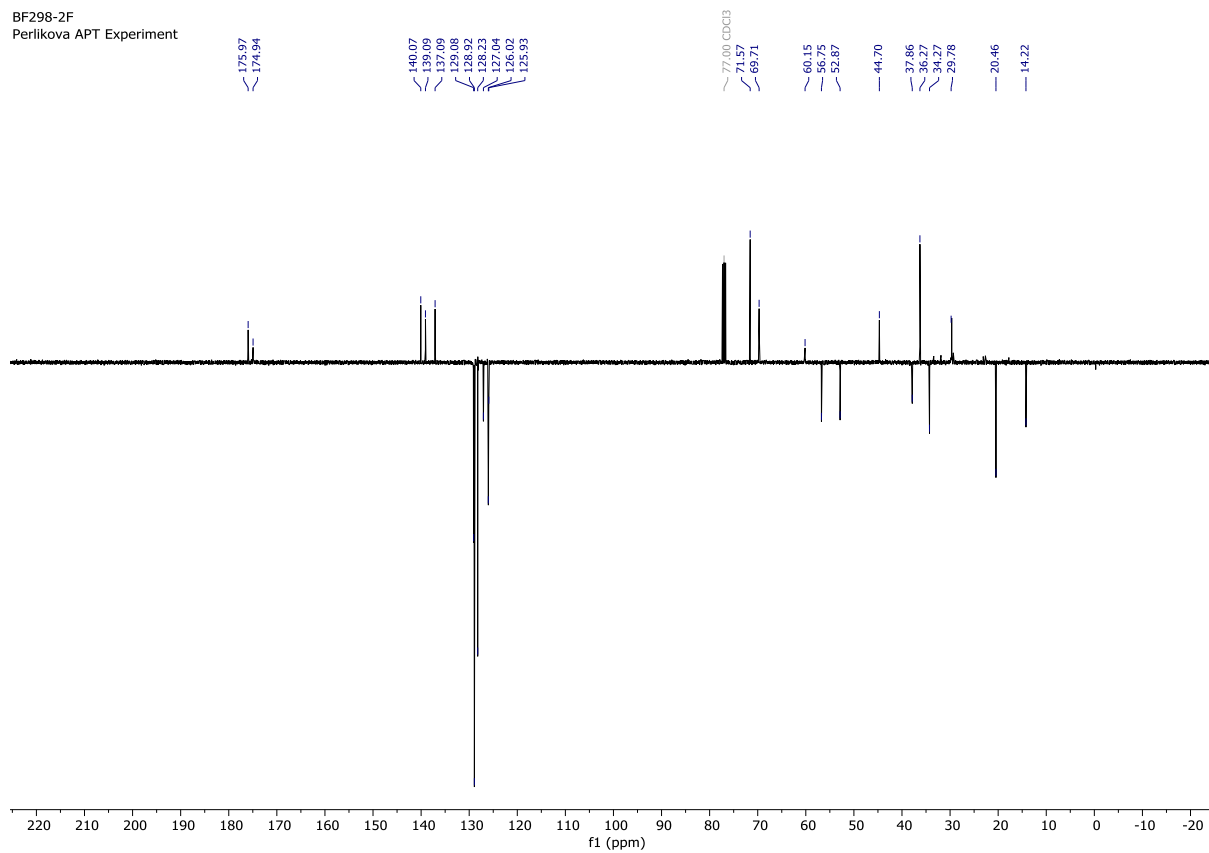

BF247.1.fid

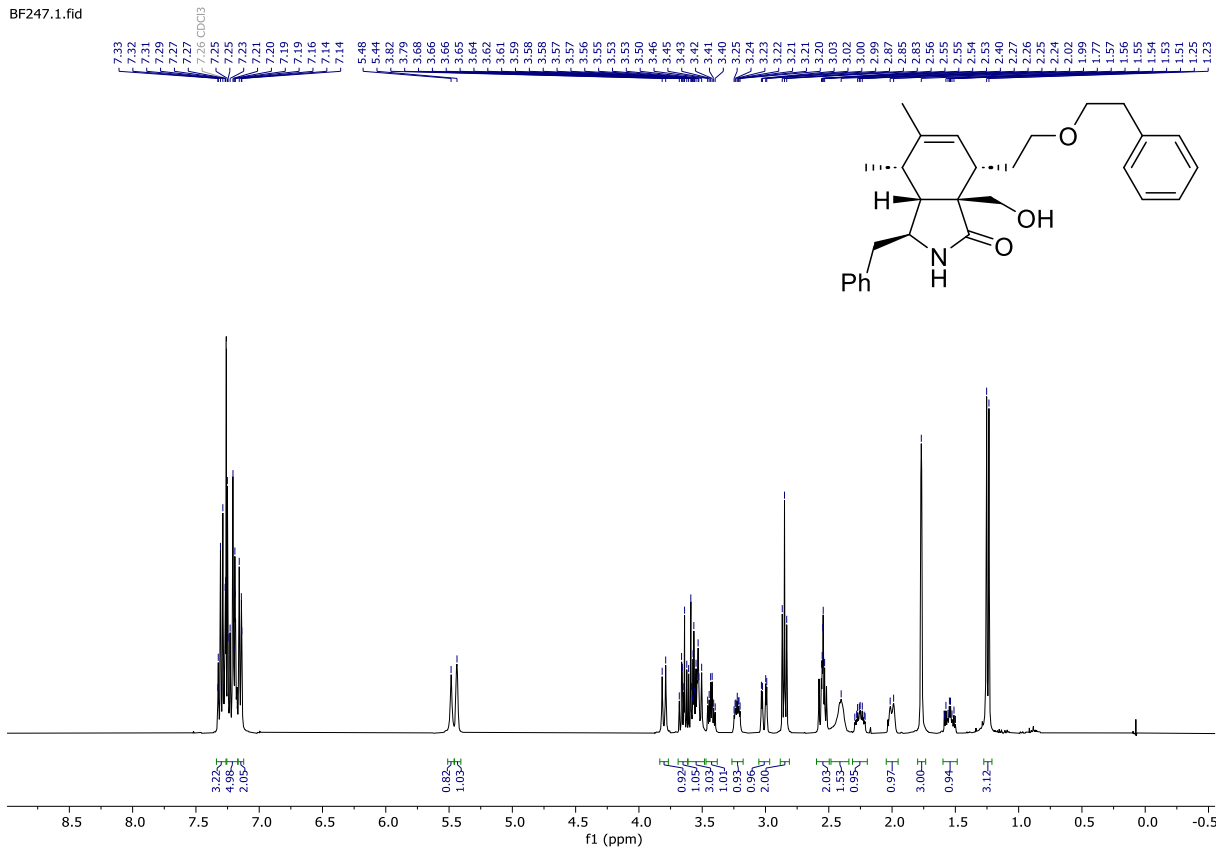

BF247.2.fid

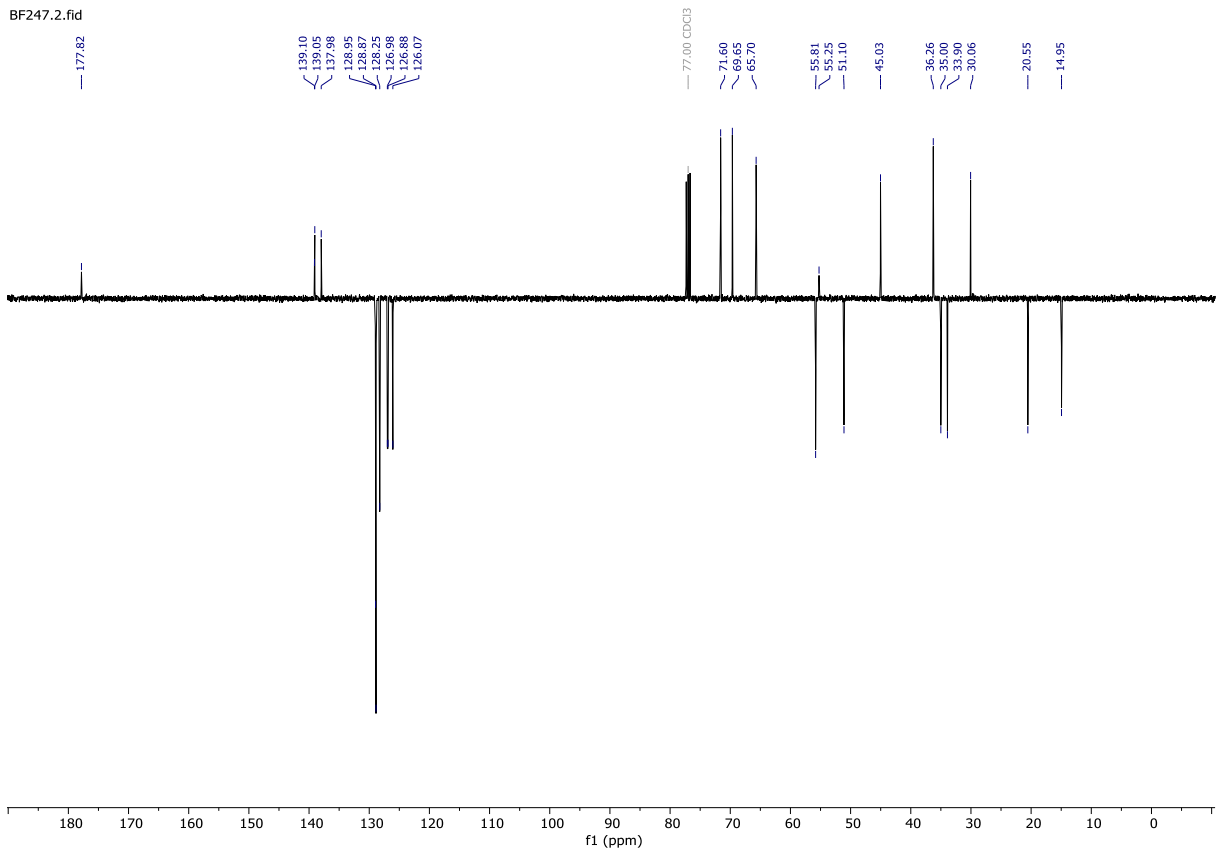

Supplement: d3md00535f1.pdf [file d3md00535f1.pdf]
